# Supplementary material for: The Role of Social Determinants of Health in Cardiovascular Diseases: An Umbrella Review
Source: PubMed Central journal article supplement — J Am Heart Assoc. 2023 Jun 22;12(13):e029765. doi: 10.1161/JAHA.123.029765 (PMC10356094; doi:10.1161/jaha.123.029765), 2023-06-22
Supplement: JAH3-12-e029765-s001.pdf [file JAH3-12-e029765-s001.pdf]

# Supplemental Material

## Data S1.

### Supplemental Results: Full narration of findings

#### Factors relating to economic stability and CVD

**Composite SES:** Findings from systematic reviews without meta-analysis showed that lower composite SES was associated with a higher risk of composite CVD<sup>61</sup> and mortality from CVD.<sup>24</sup> When examined by subtype of CVD, lower composite SES was associated with a higher risk of stroke,<sup>24</sup> coronary artery disease,<sup>24</sup> heart failure,<sup>74</sup> heart disease,<sup>43</sup> myocardial infarction,<sup>24</sup> and cardiomyopathy.<sup>42</sup> Of the systematic review without meta-analysis findings, only a study by Allan et al.<sup>75</sup> reported an inconsistent relationship between lower SES and atrial fibrillation (**Figure S1**). Of the three systematic reviews with meta-analysis,<sup>71-73</sup> two of them reported that lower composite SES was associated with a higher risk of stroke<sup>73</sup> (pooled hazard ratio (HR)=1.31; 95%CI: 1.16, 1.48, I<sup>2</sup>= 48% and p = 0.02) and stroke mortality<sup>71</sup> (pooled RR=1.31; 95%CI: 1.16, 1.48, I<sup>2</sup>=69.5% and p=0.001). Besides, the overall lower SES (combined education, occupation, income, and composite SES), as compared with the higher SES, was associated with a higher risk of stroke mortality<sup>71</sup> (pooled OR=1.39 (95% CI, 1.31, 1.48, I<sup>2</sup> = 89.9% and p= 0.001). The other systematic review with meta-analysis reported that subjective social status, adjusted for objective socioeconomic status, was not significantly associated with coronary artery disease (pooled odds ratio (OR)=1.12; 95%CI: 0.52, 2.16, I<sup>2</sup>=0.0% and p=0.509).<sup>72</sup>

**Education:** Two systematic reviews without meta-analysis found an inconsistent association between education and composite CVD<sup>83</sup> and atrial fibrillation,<sup>82</sup> and two systematic reviews without meta-analysis<sup>61, 62</sup> revealed that the risk of ischemic heart disease was higher among lower education group (**Figure S1**). When we take into account systematic reviews with meta-analysis, two of them (one meta-analysis<sup>81</sup> reported a separate effect size for male and female) indicated that having a lower educational level was significantly associated with composite CVD, pooled OR ranges from 1.2-1.50.<sup>80, 81</sup> Lower education level was also significantly associated with a higher risk of composite CVD mortality,<sup>76, 80</sup> stroke<sup>78, 80, 81</sup> and stroke mortality<sup>71</sup>, coronary artery disease,<sup>80, 81</sup> and acute myocardial infarction<sup>79</sup> (**Figure S2**).

**Occupation/employment:** In all systematic reviews without meta-analysis, except one that showed a non-significant association between occupation and composite CVD,<sup>83</sup> lower occupation or unemployment status was significantly associated with higher risks of composite CVD<sup>61, 84</sup> and CVD mortality,<sup>61, 84</sup> angina pectoris,<sup>61</sup> acute myocardial infarction,<sup>61</sup> stroke,<sup>61, 84</sup> ischemic heart disease,<sup>62, 84</sup> and atrial fibrillation<sup>82</sup> (**Figure S1**). As shown in the forest plot (**Figure S3**), the results of systematic reviews with meta-analysis evaluated that

having lowest occupation level was associated with CVD and CVD mortality (effect estimates >1 in all studies). The findings were significant in five studies and they all revealed increased risk of composite CVD,<sup>81</sup> stroke mortality,<sup>71</sup> acute myocardial infarction,<sup>79</sup> and heart failure<sup>77</sup> among people with the lower occupational status (**Figure S3**).

**Income:** Two systematic reviews without meta-analysis found an increased risk of composite CVD mortality,<sup>61</sup> myocardial infarction,<sup>61</sup> and cardiomyopathy.<sup>42</sup> However, one systematic review without meta-analysis found an inconsistent finding for an association between a lower level of income and the risk of atrial fibrillation<sup>82</sup> (**Figure S1**). Looking at the findings from systematic reviews with meta-analysis, all revealed that lower income level was associated with higher risks of CVD. Of these, the majority found a significant association. A lower level of income was significantly associated with a higher risk of CVD mortality<sup>76, 80</sup> and stroke mortality,<sup>71</sup> risk of stroke (borderline significant),<sup>80</sup> coronary artery disease,<sup>80</sup> acute myocardial infarction,<sup>79</sup> and heart failure<sup>77</sup> (**Figure S4**).

**Job insecurity:** Two systematic reviews without meta-analysis found a non-significant high risk, as well as insufficient evidence of association between job insecurity and ischemic heart disease.<sup>66, 86</sup> One systematic review without meta-analysis also found a non-significant positive association between self-reported job insecurity at baseline and incident coronary heart disease<sup>87</sup> (**Figure S1**). Besides, a finding from one systematic review with meta-analysis (the only identified meta-analysis) revealed a modest association between perceived job insecurity and incident coronary heart disease (pooled relative risk (RR)=1.19; 95%CI: 1.00, 1.42, I<sup>2</sup> = 24.6%, and P=0.170).<sup>85</sup>

**Food insecurity and homelessness/household instability:** According to findings from a systematic review without meta-analysis, composite CVD, CVD mortality, heart failure, coronary heart disease, and myocardial infarction were significantly higher among food-insecure individuals.<sup>57</sup> This review also reported an increased risk of composite CVD and CVD mortality, but not significant for CVD subtypes, among individuals with housing insecurity<sup>57</sup> (**Figure S1**). Additionally, a systematic review with meta-analysis<sup>88</sup> found a strong significant positive association between homelessness and composite CVD (pooled OR=2.96; 95%CI: 2.80, 3.13, I<sup>2</sup> = 99.1 % and P<0.001).

### **Factors relating to social and community context and CVD**

**Poor social support:** According to a systematic review without meta-analysis by Barth et al.,<sup>67</sup> low structural social support was not significantly associated with myocardial infarction (RR ranges from 1.01 to 1.2). However, low functional social support was associated with the incidence of myocardial infarction (RR range from 1.00 to 2.23). There was a significantly

higher risk of developing ischemic heart disease among those with lack of social support in both males and females.<sup>66</sup> There was also a higher risks of coronary heart disease among people with lack of social support<sup>63</sup> (**Figure S1**). According to findings from systematic reviews with meta-analysis, lack of social support had no a statistically significant association with composite CVD and CVD mortality.<sup>90</sup> A study by Freak-Poli et al.<sup>68</sup> also revealed a non-significant association between social support and composite CVD, stroke, and coronary heart disease. However, there was a statistically significant association between lack of social support and stroke<sup>66, 89</sup> (**Figure S4**).

**Loneliness and/or social isolation:** High loneliness and social isolation were associated with an increased risk of incident coronary heart disease,<sup>91</sup> heart disease,<sup>60</sup> and stroke.<sup>91, 60</sup> However, a non-significant association between loneliness and mortality from ischemic heart disease was also reported<sup>91</sup> (**Figure S1**). Systematic reviews with meta-analysis, as stated in the forest plot (**Figure S4**), revealed a statistically significant association between social isolation and loneliness and increased risk of coronary heart disease and stroke.<sup>25</sup>

**Social capital (social role, social cohesion, and social network):** According to a systematic review without meta-analysis by Chin et al.,<sup>92</sup> fewer social role were linked to higher composite CVD and CVD mortality. However, there was no statistically significant association between the social capital index (social cohesion and social network) and composite CVD mortality<sup>93, 94</sup> (**Figure S1**). One systematic review with meta-analysis evaluated interpersonal-level resilience resources (social networks) and found that social network was associated with lower odds of stroke, coronary heart disease, and CVD mortality (the finding was significant for CVD mortality only).<sup>57</sup> It also examined neighbourhood-level resilience resources (perceived social cohesion) and found perceived social cohesion as an important factor for lower odds of stroke and coronary heart disease, however, the findings were not statistically significant (**Figure S4**).

**Discrimination:** Only one systematic review without meta-analysis examined the association between discrimination and CVD and found men and women who self-reported lifetime racial discrimination had a greater risk of incident composite CVD and CVD mortality than those reporting no lifetime racial discrimination. It was also associated with a greater likelihood of reporting myocardial infarction, angina, and stroke<sup>56</sup> (**Figure S1**).

**Ethnicity and/or race:** The identified systematic reviews without meta-analysis revealed being in a certain race or ethnic group was associated with a higher risk of CVD.<sup>42, 75, 98</sup> As compared to Whites; Asians, Chinses, African-Americans, Hispanics, and Non-Hispanic Blacks had a statistically significant lower risk for atrial fibrillation.<sup>75</sup> Mortality due to ischemic

heart disease was lower among Afro-Caribbean as compared to Caucasians.<sup>98</sup> However, one systematic review without meta-analysis found an inconsistent and no evidence of race-based disparities in CVD<sup>50</sup> (**Figure S1**). Systematic reviews with meta-analysis also examined the link between ethnicity and CVD. A review by Ezzatvar et al.<sup>69</sup> revealed that Hispanic Americans had reduced risks of composite CVD, coronary artery disease, stroke, and heart failure than White people. Two systematic reviews with meta-analysis also revealed a lower risk of coronary heart disease<sup>69</sup> and Atrial fibrillation<sup>51</sup> among Blacks as compared to Whites. A lower risk of composite CVD mortality among Hispanics compared to non-Hispanics was also reported.<sup>55</sup> Besides, Chinese had a lower risk of coronary artery disease as compared to whites and south Asians, respectively.<sup>97</sup> Furthermore, as compared to Caucasians and White Europeans, Asians had a lower risk of peripheral arterial diseases<sup>47, 96</sup> (**Figure S6**).

### **Factors relating to early childhood development and CVD**

**Adverse childhood events:** Adversity during childhood was associated with a higher risk of composite CVD, coronary heart disease, stroke, and heart failure, with additional adversity increased the risk by 30%-70%.<sup>102</sup> Violence during childhood was associated with a higher risk of later life CVD (ischemic heart disease, myocardial infarction, and stroke).<sup>106</sup> One systematic review without meta-analysis also found a dose-response relationship between childhood adverse exposures and ischemic heart disease<sup>48</sup> (**Figure S1**). Considering findings from systematic reviews with meta-analysis, being exposed to adverse events during childhood was significantly associated with adulthood composite CVD,<sup>104</sup> myocardial infarction,<sup>105</sup> and ischemic heart disease.<sup>52</sup> Besides, being exposed to childhood abuse and neglect was associated with a higher risk of composite CVD<sup>53, 103</sup> and ischemic heart disease,<sup>103</sup> respectively. Furthermore, there was a borderline significant association between childhood neglect and a higher risk of later life stroke<sup>103</sup> (**Figure S7**).

**Childhood SES:** From the majority of systematic reviews without meta-analysis findings, lower childhood SES were associated with a higher risk of composite CVD,<sup>65, 102</sup> coronary heart disease,<sup>102</sup> and stroke,<sup>101, 102</sup> but not associated with heart failure.<sup>101</sup> Besides, CVD mortality,<sup>64, 102</sup> coronary heart disease mortality,<sup>64</sup> and mortality from stroke<sup>64</sup> were higher among adults with poor childhood SES. However, two systematic reviews without meta-analysis reported an inconsistent and null, respectively, association between childhood SES and CVD (coronary heart disease and heart disease)<sup>99, 100</sup> (**Figure S1**). When we consider the finding from systematic review with meta-analysis, lower childhood SES was associated with higher risks of stroke<sup>78</sup> (pooled HR= 1.31; 95%CI: 1.03, 1.68 and pooled OR= 1.28; 95%CI: 1.12, 1.46) (**Figure S7**).

## **Factors relating to neighbourhood and built environment and CVD**

**Violence during adulthood:** Findings from the majority of systematic reviews without meta-analysis revealed that intimate partner violence was associated with an increased risk of CVD.<sup>54, 108, 109</sup> Besides, sexual abuse in the military was significantly associated with being treated for a myocardial infarction but not being treated for a stroke.<sup>59</sup> However, one systematic review without meta-analysis found a mixed finding (null and increased risk) between adulthood violence and myocardial infarction, coronary heart disease, myocardial infarction, and stroke<sup>106</sup> (**Figure S1**). A systematic review with meta-analysis also reported a mixed finding with different measures of association.<sup>107</sup> It revealed that the hazard of having composite CVD was 1.32 times higher among individuals with a history of sexual violence as compared to their counterparts. However, using OR as a measure of association, a history of sexual violence was not significantly associated with CVD (**Figure S8**).

**Conflict:** A systematic review without meta-analysis found that there was a significant association between armed conflict and an increased risk of mortality from chronic ischemic heart disease and heart disease<sup>70</sup> but not mortality due to stroke<sup>70</sup>. The same study also revealed no significant association between armed conflict and myocardial infarction, ischemic heart disease, and angina pectoris. In addition, conflict had an inconsistent association with heart disease and stroke<sup>70</sup> (**Figure S1**).

**Environmental attributes:** A systematic review without meta-analysis revealed that there was a significant positive association between environmental attributes (proximity to a major road, reduced access to food stores, no recreational areas, and increased access to fast-food restaurants, far from a healthcare facility, and high traffic density) and coronary heart disease, myocardial infarction, heart failure, stroke, and angina.<sup>110</sup> Besides, fast food restaurant availability was found as a significant factor for stroke.<sup>49</sup> However, food environments, assessed among adults with low SES, such as access to grocery stores, and fast food restaurants were not associated with coronary heart disease<sup>49</sup> (**Figure S1**).

**Neighbourhood SES:** One systematic review without meta-analysis studied the association between neighbourhood SES and the incidence of stroke.<sup>26</sup> This study found that a higher neighbourhood disadvantage was associated with a higher risk of stroke, however, the findings were not statistically significant (**Figure S1**). Additionally, three systematic reviews with meta-analysis report that neighbourhood socioeconomic disadvantage was associated with a higher risk of CVD mortality, incidence of heart failure, coronary heart disease, and stroke.<sup>77, 81, 111</sup> Of these, one considers male and female participants separately and found a similar significant finding<sup>81</sup> (**Figure S8**).

**Table S1. PRIOR Checklist**

| Section Topic        | #  | Item                                                                                                                                                                                                                                                                 | Location reported (Page number)                                          |
|----------------------|----|----------------------------------------------------------------------------------------------------------------------------------------------------------------------------------------------------------------------------------------------------------------------|--------------------------------------------------------------------------|
| <b>TITLE</b>         |    |                                                                                                                                                                                                                                                                      |                                                                          |
| Title                | 1  | Identify the report as an overview of reviews.                                                                                                                                                                                                                       | 1                                                                        |
| <b>ABSTRACT</b>      |    |                                                                                                                                                                                                                                                                      |                                                                          |
| Abstract             | 2  | Provide a comprehensive and accurate summary of the purpose, methods, and results of the overview of reviews.                                                                                                                                                        | 2                                                                        |
| <b>INTRODUCTION</b>  |    |                                                                                                                                                                                                                                                                      |                                                                          |
| Rationale            | 3  | Describe the rationale for conducting the overview of reviews in the context of existing knowledge.                                                                                                                                                                  | 6; in the last paragraph of the introduction section                     |
| Objectives           | 4  | Provide an explicit statement of the objective(s) or question(s) addressed by the overview of reviews.                                                                                                                                                               | 6; last paragraph last sentence of the introduction section              |
| <b>METHODS</b>       |    |                                                                                                                                                                                                                                                                      |                                                                          |
| Eligibility criteria | 5a | Specify the inclusion and exclusion criteria for the overview of reviews. If supplemental primary studies were included, this should be stated, with a rationale.                                                                                                    | 6 and 7                                                                  |
|                      | 5b | Specify the definition of 'systematic review' as used in the inclusion criteria for the overview of reviews.                                                                                                                                                         | 7                                                                        |
| Information sources  | 6  | Specify all databases, registers, websites, organizations, reference lists, and other sources searched or consulted to identify systematic reviews and supplemental primary studies (if included). Specify the date when each source was last searched or consulted. | 8                                                                        |
| Search strategy      | 7  | Present the full search strategies for all databases, registers and websites, such that they could be reproduced. Describe any search filters and limits applied.                                                                                                    | Table S2                                                                 |
| Selection process    | 8a | Describe the methods used to decide whether a systematic review or supplemental primary study (if included) met the inclusion criteria of the overview of reviews.                                                                                                   | 7, 8, and Figure 2                                                       |
|                      | 8b | Describe how overlap in the populations, interventions, comparators, and/or outcomes of systematic reviews was identified and managed during study selection.                                                                                                        | N/A; limitation of the review and it is stated in the limitation section |

|                                                            |     |                                                                                                                                                                                                                                                                                                                   |                                                            |
|------------------------------------------------------------|-----|-------------------------------------------------------------------------------------------------------------------------------------------------------------------------------------------------------------------------------------------------------------------------------------------------------------------|------------------------------------------------------------|
|                                                            |     |                                                                                                                                                                                                                                                                                                                   | (page 25)                                                  |
| Data collection process                                    | 9a  | Describe the methods used to collect data from reports.                                                                                                                                                                                                                                                           | 8                                                          |
|                                                            | 9b  | If applicable, describe the methods used to identify and manage primary study overlap at the level of the comparison and outcome during data collection. For each outcome, specify the method used to illustrate and/or quantify the degree of primary study overlap across systematic reviews.                   | N/A                                                        |
|                                                            | 9c  | If applicable, specify the methods used to manage discrepant data across systematic reviews during data collection.                                                                                                                                                                                               | N/A                                                        |
| Data items                                                 | 10  | List and define all variables and outcomes for which data were sought. Describe any assumptions made and/or measures taken to identify and clarify missing or unclear information.                                                                                                                                | 6, 7, 12, and 13                                           |
| Risk of bias assessment                                    | 11a | Describe the methods used to <u>assess</u> risk of bias or methodological quality of the included systematic reviews.                                                                                                                                                                                             | 9                                                          |
|                                                            | 11b | Describe the methods used to <u>collect</u> data on (from the systematic reviews) and/or <u>assess</u> the risk of bias of the primary studies included in the systematic reviews. Provide a justification for instances where flawed, incomplete, or missing assessments are identified but not re-assessed.     | Collected from systematic reviews and reported in Table S4 |
|                                                            | 11c | Describe the methods used to <u>assess</u> the risk of bias of supplemental primary studies (if included).                                                                                                                                                                                                        | N/A                                                        |
| Synthesis methods                                          | 12a | Describe the methods used to summarize or synthesize results and provide a rationale for the choice(s).                                                                                                                                                                                                           | 9 and 10                                                   |
|                                                            | 12b | Describe any methods used to explore possible causes of heterogeneity among results.                                                                                                                                                                                                                              | N/A                                                        |
|                                                            | 12c | Describe any sensitivity analyses conducted to assess the robustness of the synthesized results.                                                                                                                                                                                                                  | N/A                                                        |
| Reporting bias assessment                                  | 13  | Describe the methods used to <u>collect</u> data on (from the systematic reviews) and/or <u>assess</u> the risk of bias due to missing results in a summary or synthesis (arising from reporting biases at the levels of the systematic reviews, primary studies, and supplemental primary studies, if included). | N/A                                                        |
| Certainty assessment                                       | 14  | Describe the methods used to <u>collect</u> data on (from the systematic reviews) and/or <u>assess</u> certainty (or confidence) in the body of evidence for an outcome.                                                                                                                                          | N/A (reason stated in data synthesis section; page 10)     |
| <b>RESULTS</b>                                             |     |                                                                                                                                                                                                                                                                                                                   |                                                            |
| Systematic review and supplemental primary study selection | 15a | Describe the results of the search and selection process, including the number of records screened, assessed for eligibility, and included in the overview of reviews, ideally with a flow diagram.                                                                                                               | 11 and Figure 2                                            |
|                                                            | 15b | Provide a list of studies that might appear to meet the inclusion criteria, but were excluded, with the main reason for exclusion.                                                                                                                                                                                | Supplementary Table S3                                     |



|                                                                                       |     |                                                                                                                                                                                                                                                                                                                                                                                |                                                            |
|---------------------------------------------------------------------------------------|-----|--------------------------------------------------------------------------------------------------------------------------------------------------------------------------------------------------------------------------------------------------------------------------------------------------------------------------------------------------------------------------------|------------------------------------------------------------|
| Characteristics of systematic reviews and supplemental primary studies                | 16  | Cite each included systematic review and supplemental primary study (if included) and present its characteristics.                                                                                                                                                                                                                                                             | 11, Table 1, and Table S4                                  |
| Primary study overlap                                                                 | 17  | Describe the extent of primary study overlap across the included systematic reviews.                                                                                                                                                                                                                                                                                           | N/A; limitation of the study                               |
| Risk of bias in systematic reviews, primary studies, and supplemental primary studies | 18a | Present assessments of risk of bias or methodological quality for each included systematic review.                                                                                                                                                                                                                                                                             | 13, 14, and Table S6                                       |
|                                                                                       | 18b | Present assessments ( <i>collected</i> from systematic reviews or <i>assessed</i> anew) of the risk of bias of the primary studies included in the systematic reviews.                                                                                                                                                                                                         | Table S4                                                   |
|                                                                                       | 18c | Present assessments of the risk of bias of supplemental primary studies (if included).                                                                                                                                                                                                                                                                                         | N/A                                                        |
| Summary or synthesis of results                                                       | 19a | For all outcomes, summarize the evidence from the systematic reviews and supplemental primary studies (if included). If meta-analyses were done, present for each the summary estimate and its precision and measures of statistical heterogeneity. If comparing groups, describe the direction of the effect.                                                                 | 14-18 and Table 2; Supplementary result, and Figures S1-S8 |
|                                                                                       | 19b | If meta-analyses were done, present results of all investigations of possible causes of heterogeneity.                                                                                                                                                                                                                                                                         | N/A                                                        |
|                                                                                       | 19c | If meta-analyses were done, present results of all sensitivity analyses conducted to assess the robustness of synthesized results.                                                                                                                                                                                                                                             | N/A                                                        |
| Reporting biases                                                                      | 20  | Present assessments ( <i>collected</i> from systematic reviews and/or <i>assessed</i> anew) of the risk of bias due to missing primary studies, analyses, or results in a summary or synthesis (arising from reporting biases at the levels of the systematic reviews, primary studies, and supplemental primary studies, if included) for each summary or synthesis assessed. | N/A                                                        |
| Certainty of evidence                                                                 | 21  | Present assessments ( <i>collected</i> or <i>assessed</i> anew) of certainty (or confidence) in the body of evidence for each outcome.                                                                                                                                                                                                                                         | N/A                                                        |
| <b>DISCUSSION</b>                                                                     |     |                                                                                                                                                                                                                                                                                                                                                                                |                                                            |
| Discussion                                                                            | 22a | Summarize the main findings, including any discrepancies in findings across the included systematic reviews and supplemental primary studies (if included).                                                                                                                                                                                                                    | 18-24                                                      |
|                                                                                       | 22b | Provide a general interpretation of the results in the context of other evidence.                                                                                                                                                                                                                                                                                              | 18-24                                                      |

|                                          |     |                                                                                                                                                                                                                                                                                                              |                                      |
|------------------------------------------|-----|--------------------------------------------------------------------------------------------------------------------------------------------------------------------------------------------------------------------------------------------------------------------------------------------------------------|--------------------------------------|
|                                          | 22c | Discuss any limitations of the evidence from systematic reviews, their primary studies, and supplemental primary studies (if included) included in the overview of reviews. Discuss any limitations of the overview of reviews methods used.                                                                 | 24-26                                |
|                                          | 22d | Discuss implications for practice, policy, and future research (both systematic reviews and primary research). Consider the relevance of the findings to the end users of the overview of reviews, e.g., healthcare providers, policymakers, patients, among others.                                         | 26 and 27                            |
| <b>OTHER INFORMATION</b>                 |     |                                                                                                                                                                                                                                                                                                              |                                      |
| Registration and protocol                | 23a | Provide registration information for the overview of reviews, including register name and registration number, or state that the overview of reviews was not registered.                                                                                                                                     | 6                                    |
|                                          | 23b | Indicate where the overview of reviews protocol can be accessed, or state that a protocol was not prepared.                                                                                                                                                                                                  | 6                                    |
|                                          | 23c | Describe and explain any amendments to information provided at registration or in the protocol. Indicate the stage of the overview of reviews at which amendments were made.                                                                                                                                 | 9 and 10                             |
| Support                                  | 24  | Describe sources of financial or non-financial support for the overview of reviews, and the role of the funders or sponsors in the overview of reviews.                                                                                                                                                      | 29                                   |
| Competing interests                      | 25  | Declare any competing interests of the overview of reviews' authors.                                                                                                                                                                                                                                         | 29                                   |
| Author information                       | 26a | Provide contact information for the corresponding author.                                                                                                                                                                                                                                                    | 1                                    |
|                                          | 26b | Describe the contributions of individual authors and identify the guarantor of the overview of reviews.                                                                                                                                                                                                      | N/A (based on the journal guideline) |
| Availability of data and other materials | 27  | Report which of the following are available, where they can be found, and under which conditions they may be accessed: template data collection forms; data collected from included systematic reviews and supplemental primary studies; analytic code; any other materials used in the overview of reviews. | N/A (based on the journal guideline) |

**Table S2. The search strategy used for the Medline database (August 02, 2022)**

| #  | Query                                                                                                                                                                                                                                                                                                                                                    | The number of articles found |
|----|----------------------------------------------------------------------------------------------------------------------------------------------------------------------------------------------------------------------------------------------------------------------------------------------------------------------------------------------------------|------------------------------|
| 1  | "Social Determinants of Health"/ or Socioeconomic Factors/ or Social Environment/ or social factors/ or Income/ or Residence Characteristics/ or Social Segregation/ or Poverty/ or unemployment/ or Occupations/ or job security/                                                                                                                       | 322,701                      |
| 2  | literacy/ or health literacy/ or educational status/ or health education/                                                                                                                                                                                                                                                                                | 126,842                      |
| 3  | food supply/ or famine/ or food deserts/ or food insecurity/ or food security/                                                                                                                                                                                                                                                                           | 15,941                       |
| 4  | social integration/ or social cohesion/ or social interaction/ or Social Support/                                                                                                                                                                                                                                                                        | 78,531                       |
| 5  | Environmental Exposure/ or environment/ or built environment/ or food environment/ or altitude/ or climate/                                                                                                                                                                                                                                              | 187,081                      |
| 6  | culturally competent care/ or health services accessibility/                                                                                                                                                                                                                                                                                             | 85,535                       |
| 7  | culture/ or acculturation/ or cultural characteristics/ or cultural diversity/                                                                                                                                                                                                                                                                           | 67,281                       |
| 8  | sociological factors/ or psychosocial deprivation/ or "ethnic and racial minorities"/ or minority groups/ or social capital/ or social change/ or social conditions/ or social environment/ or environmental attributes/ or social isolation/ or loneliness/ or social norms/ or sociodemographic factors/                                               | 110,749                      |
| 9  | Social Discrimination/ or Racism/ or ageism/ or systemic racism/ or sexism/ or racial groups/ or ethnicity/ or Adverse childhood experiences/                                                                                                                                                                                                            | 100,921                      |
| 10 | housing/ or housing for the elderly/ or public housing/ or refugee camps/ or Homeless Persons/                                                                                                                                                                                                                                                           | 30,408                       |
| 11 | crime/ or recidivism/ or sex offenses/ or violence/ or ethnic cleansing/ or genocide/                                                                                                                                                                                                                                                                    | 57,612                       |
| 12 | violence/ or domestic violence/ or gender-based violence/ or gun violence/ or intimate partner violence/ or spouse abuse/ or physical abuse/                                                                                                                                                                                                             | 51,876                       |
| 13 | homeless persons/ or homeless youth/ or vulnerable populations/ or working poor/ or social problems/ or minority groups/ or social marginalization/ or poverty areas/ or Cultural Deprivation/ or Medically Underserved Area/ or medical indigency/                                                                                                      | 64,390                       |
| 14 | (travel distance or residence).mp.                                                                                                                                                                                                                                                                                                                       | 84,547                       |
| 15 | (Disadvantaged or minorities or poverty or destitution or destitute or homeless* or marginali#ed or marginali#ation* or inequalities or inequities or Impoverish* or extremely poor or underpriv?leg* or unemployment or Illiteracy or Underserved or Indigency or Indigent).mp.                                                                         | 176,588                      |
| 16 | ((socioeconomic* or socio-economic* or economic* or financial* or social* or cultural* or education* or housing) adj1 (disadvantage or deprivation or insecur* or precarity or precarious* or vulnerab* or hardship* or inequit* or disparit* or isolat* or adversity or instabilit* or unstable or deprivation* or discrimination* or incarcerat*)).mp. | 43,907                       |
| 17 | ((poor* or Informal* or vulnerab* or insecure* or precarious* or overcrowd* or over-crowd* or unstabl*) adj (home? or housing or housed)).mp.                                                                                                                                                                                                            | 1,561                        |

|    |                                                                                                                                                                                                                                                                                                                                                                                                                                                                                                                                                                                                                                                              |           |
|----|--------------------------------------------------------------------------------------------------------------------------------------------------------------------------------------------------------------------------------------------------------------------------------------------------------------------------------------------------------------------------------------------------------------------------------------------------------------------------------------------------------------------------------------------------------------------------------------------------------------------------------------------------------------|-----------|
| 18 | ((ow* or lack* or "lack of" or limited or unstable or diminished) adj (socioeconomic or socio-economic* or economic* or income or literacy or education* or finances)).mp.                                                                                                                                                                                                                                                                                                                                                                                                                                                                                   | 1,968     |
| 19 | (working class* or blue collar worker* or migrant worker* or low skill* or unskilled worker* or newly arrived migrant* or new migrant* or working poor or job security).mp.                                                                                                                                                                                                                                                                                                                                                                                                                                                                                  | 5,925     |
| 20 | ((socioeconomic* or economic* or financial* or money or monetary) adj (challenge* or pressure* or strain* or stress* or cris#s)).mp.                                                                                                                                                                                                                                                                                                                                                                                                                                                                                                                         | 9,206     |
| 21 | (social determinant* or social preference* or social network* or social capital or social isolation or social participation or social support or social health or social environment* or geographic disparit* or socioeconomic determinant* or neighbo?rhood segregation* or neighbo?rhood deprivation* or neighbo?rhood status or neighbo?rhood effect* or racial disparit* or socioeconomic status* or Discrimination or stigmati?ation or economic recession or violence or loneliness or ethnic minorit* or social inequality* or food insecurity or supermarket or grocery or community engagement or community participation or social engagement).mp. | 496,921   |
| 22 | (child* socioeconomic adj (status* or position* or condition* or circumstance*)).mp.                                                                                                                                                                                                                                                                                                                                                                                                                                                                                                                                                                         | 557       |
| 23 | ((adverse childhood adj (development or experience*)) or early life stress *).mp.                                                                                                                                                                                                                                                                                                                                                                                                                                                                                                                                                                            | 4,123     |
| 24 | ((health care adj (quality or access*)) or quality of care).mp.                                                                                                                                                                                                                                                                                                                                                                                                                                                                                                                                                                                              | 60,262    |
| 25 | or/1-24                                                                                                                                                                                                                                                                                                                                                                                                                                                                                                                                                                                                                                                      | 1,388,495 |
| 26 | cerebrovascular disorders/ or brain ischemia/ or Cardiovascular Diseases/ or Heart Failure/ or congestive heart failure/ or Heart Diseases/ or Myocardial Infarction/ or Myocardial Ischemia/ or Coronary Artery Disease/ or Coronary Disease/ or Stroke/ or Angina, Stable/ or Angina Pectoris/ or Angina, Unstable/ or Arrhythmias, Cardiac/ or Cardiomyopathies/ or Peripheral Vascular Diseases/                                                                                                                                                                                                                                                         | 1,001,910 |
| 27 | ((cardiovascular or cerebrovascular or coronary or heart or cardiac) adj3 (disease* or isch?emia or infact* or failure)).mp.                                                                                                                                                                                                                                                                                                                                                                                                                                                                                                                                 | 910,041   |
| 28 | (cerebrovascular accident* or arrhythmia* or angina pectoris or unstable angina or stable angina or coronary syndrome or acute coronary syndrome or stroke or cardioembolic stroke or isch?emic stroke or lacunar stroke or h?emorrhagic stroke or adverse cardiac event or myocardial infarction or myocardial isch?emia or heart attack* or cardiovascular mortality or cardiovascular death or out-of-hospital cardiac arrest or cardiomyopath*).mp.                                                                                                                                                                                                      | 816,512   |
| 29 | (Peripheral adj2 Disease*).mp.                                                                                                                                                                                                                                                                                                                                                                                                                                                                                                                                                                                                                               | 40,321    |
| 30 | or/26-29                                                                                                                                                                                                                                                                                                                                                                                                                                                                                                                                                                                                                                                     | 1,520,854 |
| 31 | (meta-analy* or metaanaly* or metanalysis#s).mp,pt.                                                                                                                                                                                                                                                                                                                                                                                                                                                                                                                                                                                                          | 235,893   |
| 32 | (systematic* adj3 (review* or overview*)).mp,pt.                                                                                                                                                                                                                                                                                                                                                                                                                                                                                                                                                                                                             | 245,905   |
| 33 | (quantitative* adj5 (review* or overview* or synthes#s)).mp.                                                                                                                                                                                                                                                                                                                                                                                                                                                                                                                                                                                                 | 9,086     |
| 34 | (methodologic* adj5 (review* or overview*)).mp.                                                                                                                                                                                                                                                                                                                                                                                                                                                                                                                                                                                                              | 7,147     |
| 35 | (integrative research review* or research integration).mp.                                                                                                                                                                                                                                                                                                                                                                                                                                                                                                                                                                                                   | 143       |

|    |                  |         |
|----|------------------|---------|
| 36 | or/31-35         | 368,128 |
| 37 | 25 and 30 and 36 | 1,807   |

**Note:** Search strategies used for other databases will be provided on request

**Table S3. Records excluded at full-text screening stage and reasons for exclusion.**

| Bibliography of the excluded articles, listed alphabetically by first author                                                                                                                                                                                                                                                                       | Exclusion reason   |
|----------------------------------------------------------------------------------------------------------------------------------------------------------------------------------------------------------------------------------------------------------------------------------------------------------------------------------------------------|--------------------|
| 1. Abell J. Racial disparities in cardiovascular risk associated with body mass index in men and women: A subject-level meta-analysis. <i>Dissertation Abstracts International: Section B: The Sciences and Engineering</i> . 2008;68(7-B):4416.                                                                                                   | Wrong study design |
| 2. Abell JE, Egan BM, Wilson PWF, Lipsitz S, Woolson RF, Lackland DT. Differences in cardiovascular disease mortality associated with body mass between Black and White persons. <i>American journal of public health</i> . 2008;98(1):63-6.                                                                                                       | Wrong study design |
| 3. Abesamis CJ, Fruh S, Hall H, Lemley T, Zlomke KR. Cardiovascular Health of Filipinos in the United States. <i>Journal of Transcultural Nursing</i> . 2016;27(5):518-28.                                                                                                                                                                         | Wrong study design |
| 4. Addo J, Ayerbe L, Mohan KM, Crichton S, Sheldenkar A, Chen R, et al. Socioeconomic status and stroke: an updated review. <i>Stroke (00392499)</i> . 2012;43(4):1186-91.                                                                                                                                                                         | Wrong study design |
| 5. Ahmad N, Bhopal R. Is coronary heart disease rising in India? A systematic review based on ECG defined coronary heart disease. <i>Heart</i> . 2005;91(6):719-25.                                                                                                                                                                                | Assess only burden |
| 6. Al-Rousan T, AlHeresh R, Saadi A, El-Sabrouh H, Young M, Benmarhnia T, et al. Epidemiology of cardiovascular disease and its risk factors among refugees and asylum seekers: Systematic review and meta-analysis. <i>International Journal of Cardiology: Cardiovascular Risk and Prevention</i> . 2022;12:200126.                              | Wrong intervention |
| 7. Al-Shakarchi N, Evans H, Luchenski S, Story A, Banerjee A. Cardiovascular disease in the homeless: a systematic review of observational and interventional studies. <i>The Lancet</i> . 2019;394(Supplement 2):S16.                                                                                                                             | Duplicate          |
| 8. Aldridge RW, Story A, Hwang SW, Nordentoft M, Luchenski SA, Hartwell G, et al. Morbidity and mortality in homeless individuals, prisoners, sex workers, and individuals with substance use disorders in high-income countries: a systematic review and meta-analysis. <i>Lancet</i> . 2018;391(10117):241-50.                                   | Wrong outcome      |
| 9. Ali Shah SI, Hamza M, Saeed M, Haq I. Psychosocial risk factors of myocardial infarction: turning threat to opportunity. <i>Nepalese Heart Journal</i> . 2020;17(2):1-5.                                                                                                                                                                        | Wrong study design |
| 10. Alizadeh G, Gholipour K, Azami-Aghdash S, Dehnavieh R, Jafarabadi M, Azmin M, et al. Social, economic, technological, and environmental factors affecting cardiovascular diseases: A systematic review and thematic analysis. <i>International Journal of Preventive Medicine</i> . 2022;13(1):78.                                             | Wrong study design |
| 11. Allan V, Honarbakhsh S, Casas JP, Wallace J, Hunter R, Schilling R, et al. Are cardiovascular risk factors also associated with the incidence of atrial fibrillation? A systematic review and field synopsis of 23 factors in 32 initially healthy cohorts of 20 million participants. <i>Europace</i> . 2016;18(Supplement 2):ii5.            | Duplicate*         |
| 12. Allan V, Honarbakhsh S, Casas JP, Wallace J, Hunter RJ, Schilling RJ, et al. Are cardiovascular risk factors associated with the incidence of atrial fibrillation? A systematic review and field synopsis of 23 factors in 32 initially healthy cohorts of 20 million participants. <i>European Heart Journal</i> . 2016;37(Supplement 1):602. | Duplicate          |
| 13. Alston L, Allender S, Peterson K, Jacobs J, Nichols M. Rural Inequalities in the Australian Burden of Ischaemic Heart Disease: A Systematic Review. <i>Heart, lung &amp; circulation</i> . 2017;26(2):122-33.                                                                                                                                  | Wrong outcome      |

|     |                                                                                                                                                                                                                                                                                              |                    |
|-----|----------------------------------------------------------------------------------------------------------------------------------------------------------------------------------------------------------------------------------------------------------------------------------------------|--------------------|
| 14. | Amegah AK, Rezza G, Jaakkola JJK. Temperature-related morbidity and mortality in Sub-Saharan Africa: A systematic review of the empirical evidence. <i>Environment International</i> . 2016;91:133-49.                                                                                       | Wrong intervention |
| 15. | Anderson L, Brown JPR, Clark AM, Dalal H, Rossau HK, Bridges C, et al. Patient education in the management of coronary heart disease. <i>Cochrane Database of Systematic Reviews</i> . 2017;2017(6).                                                                                         | Wrong intervention |
| 16. | Anenberg SC, Haines S, Wang E, Nassikas N, Kinney PL. Synergistic health effects of air pollution, temperature, and pollen exposure: a systematic review of epidemiological evidence. <i>Environmental Health: A Global Access Science Source</i> . 2020;19(1).                              | Wrong intervention |
| 17. | Angkurawaranon C, Jiraporncharoen W, Chenthanakij B, Doyle P, Nitsch D. Urbanization and non-communicable disease in Southeast Asia: A review of current evidence. <i>Public Health</i> . 2014;128(10):886-95.                                                                               | Wrong intervention |
| 18. | Anonymous. Cardiovascular Health in American Indians and Alaska Natives: A Scientific Statement from the American Heart Association. <i>Circulation</i> . 2020:E948-E59.                                                                                                                     | Wrong intervention |
| 19. | Appleton AA, Holdsworth E, Ryan M, Tracy M. Measuring childhood adversity in life course cardiovascular research: A systematic review. <i>Psychosomatic Medicine</i> . 2017;79(4):434-40.                                                                                                    | Wrong outcome      |
| 20. | Aragon-Vela J, Bejder J, J RH, Plaza-Diaz J, Nordsborg NB. Does intermittent exposure to high altitude increase the risk of cardiovascular disease in workers? A systematic narrative review. <i>BMJ Open</i> . 2020;10(11):e041532.                                                         | Wrong intervention |
| 21. | Babaie J, asl YP, Naghipour B, Faridaalae G. Cardiovascular Diseases in Natural Disasters; a Systematic Review. <i>Archives of Academic Emergency Medicine</i> . 2021;9(1):1-16.                                                                                                             | Wrong intervention |
| 22. | Back IDC, Barros NFD, Caramelli B. Lifestyle, inadequate environments in childhood and their effects on adult cardiovascular health. <i>Jornal de Pediatria</i> . 2022;98:S19-S26.                                                                                                           | Wrong study design |
| 23. | Backé EM, Seidler A, Latza U, Rossnagel K, Schumann B. The role of psychosocial stress at work for the development of cardiovascular diseases: A systematic review. <i>International Archives of Occupational and Environmental Health</i> . 2012;85(1):67-79.                               | Wrong intervention |
| 24. | Backhouse EV, McHutchison CA, Cvoro V, Shenkin SD, Wardlaw JM. Early life risk factors for subclinical cerebrovascular disease in later life: A systematic review and meta-analysis. <i>European Stroke Journal</i> . 2016;1(1 Supplement 1):556.                                            | Duplicate          |
| 25. | Backhouse EV, McHutchison CA, Cvoro V, Shenkin SD, Wardlaw JM. Early life risk factors for cerebrovascular disease: A systematic review and meta-analysis. <i>Neurology</i> . 2017;88(10):976-84.                                                                                            | Wrong outcome      |
| 26. | Bai MF, Wang X. Risk factors associated with coronary heart disease in women: a systematic review. <i>Herz</i> . 2020;45:52-7.                                                                                                                                                               | Wrong study design |
| 27. | Baldi I, Costa G, Foltran F, Spada V, Chiffi D, Sacerdote C, et al. Effect of educational attainment on incidence and mortality for ischemic heart and cerebrovascular diseases: a systematic review and trend estimation. <i>International journal of cardiology</i> . 2013;168(5):4959-63. | Wrong study design |
| 28. | Bao QJ, Zhao K, Guo Y, Wu XT, Yang JC, Yang MF. Environmental toxic metal contaminants and risk of stroke: a systematic review and meta-analysis. <i>Environmental Science and Pollution Research</i> . 2022;29(22):32545-65.                                                                | Wrong intervention |
| 29. | Baune BT, Stuart M, Gilmour A, Wersching H, Arolt V, Berger K. Moderators of the relationship between depression and cardiovascular disorders: A systematic review. <i>General Hospital Psychiatry</i> . 2012;34(5):478-92.                                                                  | Wrong intervention |

|                                                                                                                                                                                                                                                                                                                                                                                                 |                    |
|-------------------------------------------------------------------------------------------------------------------------------------------------------------------------------------------------------------------------------------------------------------------------------------------------------------------------------------------------------------------------------------------------|--------------------|
| 30. Berra K. Does nurse case management improve implementation of guidelines for cardiovascular disease risk reduction? <i>Journal of Cardiovascular Nursing</i> . 2011;26(2):145-67.                                                                                                                                                                                                           | Wrong intervention |
| 31. Best KE, Vieira R, Glinianaia SV, Rankin J. Socio-economic inequalities in mortality in children with congenital heart disease: A systematic review and meta-analysis. <i>Paediatric and perinatal epidemiology</i> . 2019;33(4):291-309.                                                                                                                                                   | Wrong outcome      |
| 32. Bhaskaran K, Hajat S, Haines A, Herrett E, Wilkinson P, Smeeth L. Effects of ambient temperature on the incidence of myocardial infarction. <i>Heart (British Cardiac Society)</i> . 2009;95(21):1760-9.                                                                                                                                                                                    | Wrong intervention |
| 33. Bhopal R. What is the risk of coronary heart disease in South Asians? A review of UK research. <i>Journal of public health medicine</i> . 2000;22(3):375-85.                                                                                                                                                                                                                                | Assess only burden |
| 34. Biswas A, Harbin S, Irvin E, Johnston H, Begum M, Tiong M, et al. Workplace injuries and illness: What difference do sex and gender make? a systematic review. <i>Occupational and Environmental Medicine</i> . 2021;78(SUPPL 1):A50.                                                                                                                                                       | Wrong outcome**    |
| 35. Black LL, Johnson R, VanHoose L. The relationship between perceived racism/discrimination and health among black American women: A review of the literature from 2003 to 2013. <i>Journal of Racial and Ethnic Health Disparities</i> . 2015;2(1):11-20.                                                                                                                                    | Wrong outcome      |
| 36. Bolm-Audorff U, Hegewald J, Pretzsch A, Freiberg A, Nienhaus A, Seidler A. Letter to the editor regarding, "The effect of occupational exposure to noise on ischaemic heart disease, stroke and hypertension: A systematic review and meta-analysis from the WHO/ILO joint estimates of the work-related burden of disease and injury". <i>Environment International</i> . 2022;161:107104. | Wrong exposure     |
| 37. Boos CJ, De Villiers N, Dyball D, McConnell A, Bennett AN. The Relationship between Military Combat and Cardiovascular Risk: A Systematic Review and Meta-Analysis. <i>International Journal of Vascular Medicine</i> . 2019;2019.                                                                                                                                                          | Wrong intervention |
| 38. Booth J, Connelly L, Lawrence M, Chalmers C, Joice S, Becker C, et al. Evidence of perceived psychosocial stress as a risk factor for stroke in adults: A meta-analysis. <i>BMC Neurology</i> . 2015;15.                                                                                                                                                                                    | Wrong intervention |
| 39. Boulton AJ, Del Rios M, Perkins GD. Health inequities in out-of-hospital cardiac arrest. <i>Current Opinion in Critical Care</i> . 2022;28(3):229-36.                                                                                                                                                                                                                                       | Wrong study design |
| 40. Boyde M, Turner C, Thompson DR, Stewart S. Educational Interventions for Patients With Heart Failure:A Systematic Review of Randomized Controlled Trials. <i>Journal of Cardiovascular Nursing</i> . 2011;26(4):E27-E35.                                                                                                                                                                    | Wrong intervention |
| 41. Brown JP, Clark AM, Dalal H, Welch K, Taylor RS. Patient education in the management of coronary heart disease. <i>Cochrane database of systematic reviews (Online)</i> . 2011;12.                                                                                                                                                                                                          | Wrong intervention |
| 42. Brown JP, Clark AM, Dalal H, Welch K, Taylor RS. Effect of patient education in the management of coronary heart disease: A systematic review and meta-analysis of randomized controlled trials. <i>European Journal of Preventive Cardiology</i> . 2013;20(4):701-14.                                                                                                                      | Duplicate          |
| 43. Bunker A, Wildenhain J, Vandenberg A, Henschke N, Rocklöv J, Hajat S, et al. Effects of Air Temperature on Climate-Sensitive Mortality and Morbidity Outcomes in the Elderly; a Systematic Review and Meta-analysis of Epidemiological Evidence. <i>EBioMedicine</i> . 2016;6:258-68.                                                                                                       | Wrong intervention |
| 44. Bunker SJ, Colquhoun DM, Esler MD, Hickie IB, Hunt D, Jelinek VM, et al. "Stress" and coronary heart disease: psychosocial risk factors. <i>The Medical journal of Australia</i> . 2003;178(6):272-6.                                                                                                                                                                                       | Wrong study design |



|                                                                                                                                                                                                                                                                                                                               |                     |
|-------------------------------------------------------------------------------------------------------------------------------------------------------------------------------------------------------------------------------------------------------------------------------------------------------------------------------|---------------------|
| 45. Bunker SJ, Colquhoun DM, Esler MD, Hickie IB, Hunt D, Jelinek VM, et al. "Stress" and coronary heart disease: Psychosocial risk factors: National Heart Foundation of Australia position statement update. <i>Medical Journal of Australia</i> . 2003;178(6):272-6.                                                       | Duplicate           |
| 46. Burnette CE, Ka'apu KK, Liddell J, Scarnato JM. Gender differences across social, behavioral, and mental determinants of cardiovascular health among u.s. indigenous peoples: A systematic review. <i>Journal of Women's Health</i> . 2018;27(11):1419.                                                                   | Duplicate*          |
| 47. Caceres BA, Brody A, Luscombe RE, Primiano JE, Marusca P, Sitts EM, et al. A Systematic Review of Cardiovascular Disease in Sexual Minorities. <i>American journal of public health</i> . 2017;107(4):e13-e21.                                                                                                            | Wrong intervention  |
| 48. Cajita MI, Cajita TR, Han H-R. Health literacy and heart failure: A systematic review. <i>Journal of Cardiovascular Nursing</i> . 2016;31(2):121-30.                                                                                                                                                                      | Wrong outcome       |
| 49. Calvillo-King L, Lo M, Eubank K, Yunyonying P, Stieglitz H, Arnold D, et al. A systematic review of social factors on risk of readmission and death after hospitalization with pneumonia or heart failure: Implications for pay for performance. <i>Journal of General Internal Medicine</i> . 2011;26(SUPPL. 1):S225-S6. | Duplicate*          |
| 50. Calvillo–King L, Arnold D, Eubank KJ, Lo M, Yunyongying P, Stieglitz H, et al. Impact of social factors on risk of readmission or mortality in pneumonia and heart failure: Systematic review. <i>Journal of General Internal Medicine</i> . 2013;28(2):269-82.                                                           | Wrong intervention  |
| 51. Cañón-Montañez W, Duque-Cartagena T, De Ávila ML, Rodríguez-Acelas AL. Educational interventions to reduce the mortality and increase the quality of life in adults with heart failure. <i>Metas de Enfermería</i> . 2022;25(3):7-16.                                                                                     | Wrong outcome       |
| 52. Cao Y, Wang X, Zheng D, Robinson T, Hong D, Richtering S, et al. Air Pressure, Humidity and Stroke Occurrence: A Systematic Review and Meta-Analysis. <i>International Journal of Environmental Research and Public Health</i> . 2016;13(7).                                                                              | Wrong intervention  |
| 53. Cavarretta E, Carnevale R, Morello M, Peruzzi M, Versaci F, Frati G, et al. Does ethnicity play a role in acute myocardial infarction rate in hypertensive adult patients? A meta-analysis of randomized trial. <i>European Journal of Preventive Cardiology</i> . 2019;26(Supplement 1):S175.                            | Abstract#           |
| 54. Chalk TEW, Dunkley AJ, Gray LJ, Spong R, Gangadharan SK, Davies MJ, et al. Rates of Type 2 diabetes, cardiovascular disease and associated risk factors in people with intellectual disability populations: Systematic review and meta-analysis. <i>Diabetic Medicine</i> . 2016;33(SUPPL. 1):73-4.                       | Wrong Intervention* |
| 55. Chen H, Zhang B, Xue W, Li J, Li Y, Fu K, et al. Anger, hostility and risk of stroke: a meta-analysis of cohort studies. <i>Journal of neurology</i> . 2019;266(4):1016-26.                                                                                                                                               | Wrong intervention  |
| 56. Chen J, Zhou M, Yang J, Yin P, Wang B, Ou CQ, et al. The modifying effects of heat and cold wave characteristics on cardiovascular mortality in 31 major Chinese cities. <i>Environmental Research Letters</i> . 2020;15(10).                                                                                             | Wrong study design  |
| 57. Chen R, Hu Z, Chen R-L, Zhang D, Xu L, Wang J, et al. Socioeconomic deprivation and survival after stroke in China: a systematic literature review and a new population-based cohort study. <i>BMJ open</i> . 2015;5(1):e005688.                                                                                          | Wrong outcome       |
| 58. Chen R, Wei L. Association between socioeconomic deprivation and survival after stroke in china: A systematic literature review and a new population-based study. <i>Cerebrovascular Diseases</i> . 2013;36(SUPPL. 1):7.                                                                                                  | Wrong outcome       |
| 59. Chen TH, Li X, Zhao J, Zhang K. Impacts of cold weather on all-cause and cause-specific mortality in Texas, 1990–2011. <i>Environmental Pollution</i> . 2017;225:244-51.                                                                                                                                                  | Wrong study design  |

|     |                                                                                                                                                                                                                                                                                         |                    |
|-----|-----------------------------------------------------------------------------------------------------------------------------------------------------------------------------------------------------------------------------------------------------------------------------------------|--------------------|
| 60. | Cheng J, Xu Z, Bambrick H, Prescott V, Wang N, Zhang Y, et al. Cardiorespiratory effects of heatwaves: A systematic review and meta-analysis of global epidemiological evidence. <i>Environmental research</i> . 2019;177:108610.                                                       | Wrong intervention |
| 61. | Cheng J, Xu Z, Zhu R, Wang X, Jin L, Song J, et al. Impact of diurnal temperature range on human health: a systematic review. <i>International journal of biometeorology</i> . 2014;58(9):2011-24.                                                                                      | Wrong intervention |
| 62. | Choi SE, Ong E. A review of health literacy and chronic disease outcomes. <i>Communicating Nursing Research</i> . 2013;46:638-.                                                                                                                                                         | Abstract           |
| 63. | Clark AM, Hartling L, Vandermeer B, McAlister FA. Meta-analysis: Secondary prevention programs for patients with coronary artery. <i>Annals of Internal Medicine</i> . 2005;143(9):659-72+I87.                                                                                          | Wrong intervention |
| 64. | Cockerham WC, Hamby BW, Oates GR. The Social Determinants of Chronic Disease. <i>American Journal of Preventive Medicine</i> . 2017;52(1 Supplement 1):S5-S12.                                                                                                                          | Wrong study design |
| 65. | Coleman A, Enard KR, Yakubu RA, Butcher B, Hauptman PJ. The influence of social determinants on heart failure outcomes: A systematic review. <i>Circulation</i> . 2021;144(SUPPL 1).                                                                                                    | Abstract           |
| 66. | Commodore-Mensah Y, Dennison Himmelfarb CR. Patient education strategies for hospitalized cardiovascular patients: A systematic review. <i>Journal of Cardiovascular Nursing</i> . 2012;27(2):154-74.                                                                                   | Wrong intervention |
| 67. | Cortes-Bergoderi MJ, Goel K, Hassan Murad M, Allison T, Somers VK, Lopez Jimenez F. The hispanic paradox of cardiovascular mortality: A systematic review and meta-analysis. <i>Circulation</i> . 2011;124(21 SUPPL. 1).                                                                | Duplicate          |
| 68. | Critchley JA, Capewell S. Prospective cohort studies of coronary heart disease in the UK: a systematic review of past, present and planned studies. <i>Journal of cardiovascular risk</i> . 2003;10(2):111-9.                                                                           | Wrong outcome      |
| 69. | Culic V. Changing trends and public health relevance of myocardial infarctions attributable to cold and heat. <i>European Heart Journal</i> . 2019;40(41):3438-9.                                                                                                                       | Wrong study design |
| 70. | Daniel CM, Davila L, Makris UE, Mayo H, Caplan L, Davis L, et al. Ethnic Disparities in Atherosclerotic Cardiovascular Disease Incidence and Prevalence Among Rheumatoid Arthritis Patients in the United States: a Systematic Review. <i>ACR Open Rheumatology</i> . 2020;2(9):525-32. | Assess only burden |
| 71. | Dassanayake J, Gurrin L, Payne WR, Sundararajan V, Dharmage SC. Cardiovascular disease risk in immigrants: What is the evidence and where are the gaps? <i>Asia-Pacific Journal of Public Health</i> . 2011;23(6):882-95.                                                               | Wrong study design |
| 72. | Davey B, Sinha R, Lee JH, Gauthier M, Flores G. Social determinants of health and outcomes for children and adults with congenital heart disease: a systematic review. <i>Pediatric research</i> . 2021;89(2):275-94.                                                                   | Wrong outcome      |
| 73. | de Mestral C, Stringhini S. Socioeconomic Status and Cardiovascular Disease: an Update. <i>Current cardiology reports</i> . 2017;19(11):115.                                                                                                                                            | Wrong study design |
| 74. | Do NT, Bellingham K, Newton PN, Caillet C. The quality of medical products for cardiovascular diseases: a gap in global cardiac care. <i>BMJ global health</i> . 2021;6(9).                                                                                                             | Wrong intervention |
| 75. | Dolatabadi SK, Zakerimoghdam M, Rahmanian M, Abbasi Z. The impact of climate change on heart failure: A narrative review study. <i>Shiraz E Medical Journal</i> . 2021;22(9).                                                                                                           | Wrong study design |

|                                                                                                                                                                                                                                                                                                                              |                     |
|------------------------------------------------------------------------------------------------------------------------------------------------------------------------------------------------------------------------------------------------------------------------------------------------------------------------------|---------------------|
| 76. Dusseldorp E, van Elderen T, Maes S. Review: Psychoeducational programmes reduce MI recurrence and improve some physical health outcomes. <i>Evidence-Based Medicine</i> . 2000;5(3):83.                                                                                                                                 | Duplicate           |
| 77. Dusseldorp E, van Elderen T, Maes S, Meulman J, Kraaij V. A meta-analysis of psychoeducational programs for coronary heart disease patients. <i>Health psychology : official journal of the Division of Health Psychology, American Psychological Association</i> . 1999;18(5):506-19.                                   | Wrong intervention  |
| 78. Dwyer M, Rehman S, Ottavi T, Stankovich J, Gall S, Peterson G, et al. Urban-rural differences in the care and outcomes of acute stroke patients: Systematic review. <i>Journal of the neurological sciences</i> . 2019;397:63-74.                                                                                        | Wrong intervention  |
| 79. Dzhambov AM, Dimitrova DD. Occupational noise and ischemic heart disease: A systematic review. <i>Noise and Health</i> . 2016;18(83):167-77.                                                                                                                                                                             | Wrong intervention  |
| 80. Elyamani R, Soulaymani A, Hami H. Epidemiology of Cardiovascular Diseases in Morocco: A Systematic Review. <i>The review of diabetic studies : RDS</i> . 2021;17(2):57-67.                                                                                                                                               | Wrong intervention  |
| 81. Esparza-Aguilar M, Arroyo P, Gomez-Verjan JC, Martin-Martin V. Early life exposure and its association with diseases in adulthood: review of longitudinal studies. <i>Exposiciones tempranas en la vida y su asociacion con enfermedades en la edad adulta: revision de estudios longitudinales</i> . 2020;77(4):153-65. | Wrong study design  |
| 82. Fabbri M, Murad HM, Wennberg AM, Turcano P, Erwin PJ, Berti A, et al. Health literacy and outcomes among patients with heart failure: A systematic review and meta-analysis. <i>Circulation</i> . 2018;138(Supplement 1).                                                                                                | Duplicate           |
| 83. Fabbri M, Murad MH, Wennberg AM, Turcano P, Erwin PJ, Alahdab F, et al. Health Literacy and Outcomes Among Patients With Heart Failure: A Systematic Review and Meta-Analysis. <i>JACC Heart failure</i> . 2020;8(6):451-60.                                                                                             | Wrong outcome       |
| 84. Fang SC, Cassidy A, David CC. A systematic review of occupational exposure to particulate matter and cardiovascular disease. <i>International Journal of Environmental Research and Public Health</i> . 2010;7(4):1773-806.                                                                                              | Wrong intervention  |
| 85. Fazeli Dehkordi ZS, Khatami SM, Ranjbar E. The Associations Between Urban Form and Major Non-communicable Diseases: a Systematic Review. <i>Journal of Urban Health</i> . 2022.                                                                                                                                          | Wrong intervention  |
| 86. Fernando E, Razak F, Lear SA, Anand SS. Cardiovascular Disease in South Asian Migrants. <i>Canadian Journal of Cardiology</i> . 2015;31(9):1139-50.                                                                                                                                                                      | Wrong study design  |
| 87. Foguet-Boreu Q, Ayerbe Garcia-Morzon L. [Psychosocial stress, high blood pressure and cardiovascular risk]. <i>Estres psicosocial, hipertension arterial y riesgo cardiovascular</i> . 2021;38(2):83-90.                                                                                                                 | Wrong study design  |
| 88. Fransson EI, Kivimaki M. Psychosocial work environment and risk of stroke: Findings from the IPD-work consortium. <i>European Journal of Preventive Cardiology</i> . 2017;24(2 Supplement 1):10.                                                                                                                         | Wrong intervention* |
| 89. Freak-Poli R, Hu J, Phyo AZZ, Barker F. Does social isolation, social support or loneliness influence health or well-being after a cardiovascular disease event? A narrative thematic systematic review. <i>Health &amp; Social Care in the Community</i> . 2021:No-Specified.                                           | Wrong outcome       |
| 90. Freak-Poli R, Hu J, Phyo AZZ, Barker F. Does social isolation, social support or loneliness influence health or well-being after a cardiovascular disease event? A narrative thematic systematic review. <i>Health &amp; Social Care in the Community</i> . 2022;30(1):e16-e38.                                          | Duplicate           |

|      |                                                                                                                                                                                                                                                              |                    |
|------|--------------------------------------------------------------------------------------------------------------------------------------------------------------------------------------------------------------------------------------------------------------|--------------------|
| 91.  | Funk AM, Neil Greene R, Dill K, Valvassori P. The Impact of Homelessness on Mortality of Individuals Living in the United States: A Systematic Review of the Literature. <i>Journal of Health Care for the Poor and Underserved</i> . 2022;33(1):457-77.     | Wrong outcome      |
| 92.  | Gangopadhyay DB, Bhopal R. Psychosocial factors in relation to coronary heart disease in South Asians: A systematic review. <i>International Medicine</i> . 2020;2(2):125-43.                                                                                | Wrong outcome      |
| 93.  | Gifford A, Biffi A, Gelaye B, Chemali Z. Shedding Light on the Causes and Characteristics of Stroke in Lebanon: A Systematic Review of Literature. <i>Journal of Geriatric Psychiatry and Neurology</i> . 2021.                                              | Wrong study design |
| 94.  | Gillum DR, Staffileno BA. An Integrative Review of the Current Knowledge of Cardiovascular Disease and Associated Risk Factors in the Old Order Amish. <i>Journal of Transcultural Nursing</i> . 2011;22(2):182-90.                                          | Wrong study design |
| 95.  | Goel G, Poureslami I, Stenstrom R, Harris DR. Patient and caregiver health literacy in stroke: A systematic review. <i>Canadian Journal of Emergency Medicine</i> . 2014;16(SUPPL. 1):S36.                                                                   | Abstract           |
| 96.  | Goyal S, Sanghera DK. Genetic and non-genetic determinants of cardiovascular disease in south asians. <i>Current Diabetes Reviews</i> . 2021;17(9).                                                                                                          | Wrong study design |
| 97.  | Graber M, Baptiste L, Mohr S, Blanc-Labarre C, Dupont G, Giroud M, et al. A review of psychosocial factors and stroke: A new public health problem. <i>Revue Neurologique</i> . 2019;175(10):686-92.                                                         | Wrong study design |
| 98.  | Green R, Tata L, Sprigg N. A SYSTEMATIC REVIEW AND META-ANALYSIS OF RISK FACTORS FOR PREGNANCY-ASSOCIATED STROKE. <i>Journal of Epidemiology and Community Health</i> . 2019;73(Supplement 1):A37.                                                           | Abstract           |
| 99.  | Grummitt LR, Kreski NT, Kim SG, Platt J, Keyes KM, McLaughlin KA. Association of Childhood Adversity With Morbidity and Mortality in US Adults: A Systematic Review. <i>JAMA pediatrics</i> . 2021;175(12):1269-78.                                          | Wrong study design |
| 100. | Gupta R, Khedar RS, Gaur K, Xavier D. Low quality cardiovascular care is important coronary risk factor in India. <i>Indian heart journal</i> . 2018;70 Suppl 3:S419-S30.                                                                                    | Wrong study design |
| 101. | Gwadry-Sridhar FH, Flintoft V, Lee DS, Lee H, Guyatt GH. A systematic review and meta-analysis of studies comparing readmission rates and mortality rates in patients with heart failure. <i>Archives of Internal Medicine</i> . 2004;164(21):2315-20.       | Wrong intervention |
| 102. | Harris R, Nelson LA, Muller C, Buchwald D. Stroke in American Indians and Alaska Natives: A systematic review. <i>American Journal of Public Health</i> . 2015;105(8):e16-e26.                                                                               | Wrong intervention |
| 103. | Hemingway H, Langenberg C, Damant J, Frost C, Pyorala K, Barrett-Connor E. Prevalence of angina in women versus men: a systematic review and meta-analysis of international variations across 31 countries. <i>Circulation</i> . 2008;117(12):1526-36.       | Assess only burden |
| 104. | Hemingway H, Marmot M. Psychosocial factors in the aetiology and prognosis of coronary heart disease: Systematic review of prospective cohort studies. <i>British Medical Journal</i> . 1999;318(7196):1460-7.                                               | Wrong study design |
| 105. | Herbig B, Dragano N, Angerer P. Health in the long-term unemployed. <i>Deutsches Arzteblatt International</i> . 2013;110(23-24):413-9.                                                                                                                       | Wrong study design |
| 106. | Hodgson S, Watts I, Fraser S, Roderick P, Dambha-Miller H. Loneliness, social isolation, cardiovascular disease and mortality: a synthesis of the literature and conceptual framework. <i>Journal of the Royal Society of Medicine</i> . 2020;113(5):185-92. | Wrong study design |
| 107. | Holt-Lunstad J, Smith TB, Layton JB. Social relationships and mortality risk: a meta-analytic review. <i>PLoS medicine</i> . 2010;7(7):e1000316.                                                                                                             | Wrong outcome      |

|                                                                                                                                                                                                                                                                                                           |                    |
|-----------------------------------------------------------------------------------------------------------------------------------------------------------------------------------------------------------------------------------------------------------------------------------------------------------|--------------------|
| 108. Hu M-j, Ma W-j, Zhang Y-h, Liu T, Lin H-l, Luo Y, et al. [Relationship between temperature and the risks of mortality in China: a Meta-analysis]. <i>Zhonghua liu xing bing xue za zhi = Zhonghua liuxingbingxue zazhi</i> . 2013;34(9):922-6.                                                       | Wrong intervention |
| 109. Hutchinson RN, Shin S. Systematic review of health disparities for cardiovascular diseases and associated factors among American Indian and Alaska Native populations. <i>PloS one</i> . 2014;9(1):e80973.                                                                                           | Assess only burden |
| 110. Huxley R, Owen CG, Whincup PH, Cook DG, Rich-Edwards J, Smith GD, et al. Is birth weight a risk factor for ischemic heart disease in later life? <i>The American journal of clinical nutrition</i> . 2007;85(5):1244-50.                                                                             | Wrong intervention |
| 111. Hwang WJ, Hong O. Work-related cardiovascular disease risk factors using a socioecological approach: implications for practice and research. <i>European journal of cardiovascular nursing</i> . 2012;11(1):114-26.                                                                                  | Wrong study design |
| 112. Ismail SU, Asamane EA, Osei-Kwasi HA, Boateng D. Socioeconomic Determinants of Cardiovascular Diseases, Obesity, and Diabetes among Migrants in the United Kingdom: A Systematic Review. <i>International journal of environmental research and public health</i> . 2022;19(5).                      | Wrong intervention |
| 113. Jackson AC, Murphy BM, Ski CF, Thompson DR. Psychosocial interventions for patients after a cardiac event. <i>Handbook of psychocardiology, Vols 1-2</i> . 2016:915-34.                                                                                                                              | Wrong study design |
| 114. Jacquet-Smailovic M, Brennstuhl MJ, Tarquinio C. Adverse childhood experiences related to subsequent myocardial infarction: A systematic review. <i>Journal of Family Trauma, Child Custody and Child Development</i> . 2021;18(4):372-88.                                                           | Wrong study design |
| 115. Jadambaa A, Spickett J, Badrakh B, Norman RE. The impact of the environment on health in Mongolia: A systematic review. <i>Asia-Pacific Journal of Public Health</i> . 2015;27(1):45-75.                                                                                                             | Wrong intervention |
| 116. Jain P. Psychosocial factors and cardiovascular disease. <i>Indian Heart Journal</i> . 2008;60(SUPPL. B):B38-B47.                                                                                                                                                                                    | Article not found  |
| 117. Jakubowski KP, Cundiff JM, Matthews KA. Cumulative childhood adversity and adult cardiometabolic disease: A meta-analysis. <i>Health Psychology</i> . 2018;37(8):701-15.                                                                                                                             | Wrong outcome      |
| 118. Jankovic J, Mandic-Rajcevic S, Davidovic M, Jankovic S. Demographic and socioeconomic inequalities in ideal cardiovascular health: A systematic review and meta-analysis. <i>PloS one</i> . 2021;16(8):e0255959.                                                                                     | Wrong outcome      |
| 119. Jeemon P, Neogi S, Bhatnagar D, Cruickshank KJ, Prabhakaran D. The impact of migration on cardiovascular disease and its risk factors among people of Indian origin. <i>Current Science</i> . 2009;97(3):378-84.                                                                                     | Wrong study design |
| 120. Jiang Y, Shorey S, Seah B, Chan WX, Tam WWS, Wang W. The effectiveness of psychological interventions on self-care, psychological and health outcomes in patients with chronic heart failure—A systematic review and meta-analysis. <i>International Journal of Nursing Studies</i> . 2018;78:16-25. | Wrong intervention |
| 121. Jin K, Ding D, Gullick J, Koo F, Neubeck L. Coronary heart disease in Chinese living in western countries: New insights from a systematic review and meta-analysis. <i>Heart Lung and Circulation</i> . 2015;24(SUPPL. 3):S119.                                                                      | Duplicate*         |
| 122. John-Baptiste A, Naglie G, Tomlinson G, Alibhai SMH, Etchells E, Cheung A, et al. The effect of English language proficiency on length of stay and in-hospital mortality. <i>Journal of general internal medicine</i> . 2004;19(3):221-8.                                                            | Wrong study design |
| 123. Juliane Teresa Koenig JT, Busch MA. Trends in social inequalities in cardiovascular disease among the general population in high-income countries: A systematic review. <i>European Journal of Preventive Cardiology</i> . 2017;24(1 Supplement 1):S148.                                             | Abstract           |

|                                                                                                                                                                                                                                                                                                                |                    |
|----------------------------------------------------------------------------------------------------------------------------------------------------------------------------------------------------------------------------------------------------------------------------------------------------------------|--------------------|
| 124. Kanejima Y, Shimogai T, Kitamura M, Ishihara K, Izawa KP. Impact of health literacy in patients with cardiovascular diseases: A systematic review and meta-analysis. <i>Patient Education and Counseling</i> . 2022;105(7):1793-800.                                                                      | Wrong outcome      |
| 125. Katsarou AL, Triposkiadis F, Panagiotakos D. Perceived stress and vascular disease: Where are we now? <i>Angiology</i> . 2013;64(7):529-34.                                                                                                                                                               | Wrong study design |
| 126. Kawada T. Recreational and occupational physical activities as risk factors for cardiovascular disease. <i>International Journal of Cardiology</i> . 2013;165(3):559-60.                                                                                                                                  | Wrong intervention |
| 127. Kerr GD, Slavin H, Clark D, Coupar F, Langhorne P, Stott DJ. Do vascular risk factors explain the association between socioeconomic status and stroke incidence: a meta-analysis. <i>Cerebrovascular diseases (Basel, Switzerland)</i> . 2011;31(1):57-63.                                                | Duplicate          |
| 128. Kharbach A, Obtel M, Lahlou L, Aasfara J, Mekaoui N, Razine R. Ischemic stroke in Morocco: A systematic review. <i>BMC Neurology</i> . 2019;19(1):349.                                                                                                                                                    | Wrong intervention |
| 129. Kingsbury JH, Buxton OM, Emmons KM, Redline S. Sleep and its Relationship to Racial and Ethnic Disparities in Cardiovascular Disease. <i>Current Cardiovascular Risk Reports</i> . 2013;7(5):387-94.                                                                                                      | Wrong study design |
| 130. Koton S, Gerber Y, Goldbourt U, Drory Y. Socioeconomic risk factor aggregation and long-term incidence of ischemic stroke in patients after first acute myocardial infarction. <i>International journal of cardiology</i> . 2012;157(3):324-9.                                                            | Wrong study design |
| 131. Kreatsoulas C, Corsi DJ, Subramanian SV. Commentary: The salience of socioeconomic status in assessing cardiovascular disease and risk in low- and middle-income countries. <i>International Journal of Epidemiology</i> . 2015;44(5):1636-47.                                                            | Wrong study design |
| 132. Kuzmenko NV, Galagudza MM. Dependence of seasonal dynamics of hemorrhagic and ischemic strokes on the climate of a region: A meta-analysis. <i>International Journal of Stroke</i> . 2022;17(2):226-35.                                                                                                   | Wrong intervention |
| 133. Larsen MH, Mengshoel AM, Andersen MH, Borge CR, Ahlsen B, Dahl KG, et al. "A bit of everything": Health literacy interventions in chronic conditions – a systematic review. <i>Patient Education and Counseling</i> . 2022.                                                                               | Wrong outcome      |
| 134. Leung CY, Huang H-L, Abe SK, Saito E, Islam MR, Rahman MS, et al. Association of Marital Status With Total and Cause-Specific Mortality in Asia. <i>JAMA network open</i> . 2022;5(5):e2214181.                                                                                                           | Wrong study design |
| 135. Li Y, Bentley R, Singh A, Alfonzo LF. HOUSING DISADVANTAGE IN CHILDHOOD AND HEALTH: A SYSTEMATIC REVIEW. <i>Journal of Epidemiology and Community Health</i> . 2021;75(Supplement 1):A7.                                                                                                                  | Abstract           |
| 136. Li-yuan SUN, Eun-whan LEE, Aqeela Z, Jae-hyun P. Risk Factors of Cardiovascular Disease and Their Related Socio-Economical, Environmental and Health Behavioral Factors: Focused on Low-Middle Income Countries- A Narrative Review Article. <i>Iranian Journal of Public Health</i> . 2015;44(4):435-44. | Wrong study design |
| 137. Linden W. Review: depression, social isolation, and certain life events are associated with the development of coronary heart disease. <i>ACP Journal Club</i> . 2003;139(3):81-.                                                                                                                         | Wrong study design |
| 138. Liu GD, Wang H, Huang ZG. Social isolation, chronic diseases and prevention in old age. <i>Journal of the American Geriatrics Society</i> . 2019;67(Supplement 4):S663.                                                                                                                                   | Abstract           |
| 139. Liu J, Varghese BM, Hansen A, Zhang Y, Driscoll T, Morgan G, et al. Heat exposure and cardiovascular health outcomes: a systematic review and meta-analysis. <i>The Lancet Planetary Health</i> . 2022;6(6):e484-e95.                                                                                     | Wrong intervention |

|                                                                                                                                                                                                                                                                                                                                                                                     |                       |
|-------------------------------------------------------------------------------------------------------------------------------------------------------------------------------------------------------------------------------------------------------------------------------------------------------------------------------------------------------------------------------------|-----------------------|
| 140. Liu XX, Ma XL, Huang WZ, Luo YN, He CJ, Zhong XM, et al. Green space and cardiovascular disease: A systematic review with meta-analysis. <i>Environmental Pollution</i> . 2022;301.                                                                                                                                                                                            | Wrong intervention    |
| 141. Lu Y, Hajifathalian K, Ezzati M, Rimm E, Danaei G. Racial disparities in coronary heart disease risk among united states adults. <i>Circulation</i> . 2014;129(SUPPL. 1).                                                                                                                                                                                                      | Wrong study design    |
| 142. Luo Q, Li S, Guo Y, Han X, Jaakkola JJK. A systematic review and meta-analysis of the association between daily mean temperature and mortality in China. <i>Environmental research</i> . 2019;173:281-99.                                                                                                                                                                      | Wrong intervention    |
| 143. Luttik ML, Jaarsma T, Moser D, Sanderman R, van Veldhuisen DJ. The importance and impact of social support on outcomes in patients with heart failure: an overview of the literature. <i>Journal of Cardiovascular Nursing</i> . 2005;20(3):162-9.                                                                                                                             | Wrong study design    |
| 144. Ma Y, Zhang Y, Cheng B, Feng F, Jiao H, Zhao X, et al. A review of the impact of outdoor and indoor environmental factors on human health in China. <i>Environmental Science and Pollution Research</i> . 2020;27(34):42335-45.                                                                                                                                                | Wrong intervention    |
| 145. Malwane M, Abad J, Riddle M, Thompson M. ADVERSE CHILDHOOD EXPERIENCES (ACE) and COMORBIDITIES among ADULTS with DIABETES MELLITUS: META-ANALYSIS of the ASSOCIATION between ACE and DIABETIC DEPRESSION. <i>Journal of Investigative Medicine</i> . 2021;70:291.                                                                                                              | Abstract <sup>a</sup> |
| 146. Manfredini R, De Giorgi A, Tiseo R, Boari B, Cappadona R, Salmi R, et al. Marital status, cardiovascular diseases, and cardiovascular risk factors: A review of the evidence. <i>Journal of Women's Health</i> . 2017;26(6):624-32.                                                                                                                                            | Wrong intervention    |
| 147. Martinez-Garcia M, Salinas-Ortega M, Estrada-Arriaga I, Hernandez-Lemus E, Garcia-Herrera R, Vallejo M. A systematic approach to analyze the social determinants of cardiovascular disease. <i>PloS one</i> . 2018;13(1):e0190960.                                                                                                                                             | Wrong study design    |
| 148. Marzuki MF, Yueting K, Awang Mahmud AB, Moy FM. Systematic review of life course social determinants of health and their association with adulthood metabolic syndrome. <i>Journal of Health and Translational Medicine</i> . 2020;23(Supplement 1):254-65.                                                                                                                    | Wrong outcome         |
| 149. Mau MK, Sinclair K, Saito EP, Baumhofer KN, Kaholokula JK, Mau MK, et al. Cardiometabolic health disparities in native Hawaiians and other Pacific Islanders. <i>Epidemiologic Reviews</i> . 2009;31:113-29.                                                                                                                                                                   | Wrong outcome         |
| 150. McEwing R, McLachlan A, Lund M, Carrucan-Wood L. The impact of health literacy on the health outcomes of the heart failure population. <i>Heart Lung and Circulation</i> . 2017;26(Supplement 1):S8.                                                                                                                                                                           | Wrong study design    |
| 151. McHutchison CA, Backhouse EV, Shenkin SD, Cvoro V, Wardlaw JM. Early life risk factors and stroke in later life: Systematic review and meta-analysis. <i>European Stroke Journal</i> . 2016;1(1 Supplement 1):736.                                                                                                                                                             | Duplicate*            |
| 152. McMichael AJ, McGuinness B, Lee J, Minh HV, Woodside JV, McEvoy CT. Food insecurity and brain health in adults: A systematic review. <i>Critical reviews in food science and nutrition</i> . 2021:1-16.                                                                                                                                                                        | Wrong outcome         |
| 153. Medina EL, Loques Filho O, Mesquita CT. Health social networks as online life support groups for patients with cardiovascular diseases. <i>Arquivos brasileiros de cardiologia</i> . 2013;101(2):e39-45.                                                                                                                                                                       | Wrong study design    |
| 154. Medina-Ramon M, Schwartz J. Temperature, temperature extremes, and mortality: a study of acclimatisation and effect modification in 50 US cities. <i>Occupational and environmental medicine</i> . 2007;64(12):827-33.                                                                                                                                                         | Wrong study design    |
| 155. Meyer JF, Larsen SB, Blond K, Damsgaard CT, Bjerregaard LG, Baker JL. Associations between body mass index and height during childhood and adolescence and the risk of coronary heart disease in adulthood: A systematic review and meta-analysis. <i>Obesity reviews : an official journal of the International Association for the Study of Obesity</i> . 2021;22(9):e13276. | Wrong intervention    |

|                                                                                                                                                                                                                                                                            |                       |
|----------------------------------------------------------------------------------------------------------------------------------------------------------------------------------------------------------------------------------------------------------------------------|-----------------------|
| 156. Mezzoiuso AG, Gola M, Rebecchi A, Ricco M, Capolongo S, Buffoli M, et al. Indoors and health: results of a systematic literature review assessing the potential health effects of living in basements. <i>Acta bio-medica : Atenei Parmensis</i> . 2017;88(3):375-82. | Wrong intervention    |
| 157. Min LY, Islam RB, Gandrakota N, Shah MK. The social determinants of health associated with cardiometabolic diseases among Asian American subgroups: a systematic review. <i>BMC health services research</i> . 2022;22(1):257.                                        | Wrong outcome         |
| 158. Moghadamnia MT, Ardalan A, Mesdaghinia A, Keshtkar A, Naddafi K, Yekaninejad MS. Ambient temperature and cardiovascular mortality: A systematic review and meta-analysis. <i>PeerJ</i> . 2017;2017(8):3574.                                                           | Wrong intervention    |
| 159. Moledina A, Tang KL. Socioeconomic Status, Mortality, and Access to Cardiac Services After Acute Myocardial Infarction in Canada: A Systematic Review and Meta-analysis. <i>CJC Open</i> . 2021;3(7):950-64.                                                          | Wrong outcome         |
| 160. Mookadam F, Arthur HM. Social support and its relationship to morbidity and mortality after acute myocardial infarction: systematic overview. <i>Archives of internal medicine</i> . 2004;164(14):1514-8.                                                             | Wrong outcome         |
| 161. Moslehi S, Dowlati M. Effects of Extreme Ambient Temperature on Cardiovascular Outcomes: A Systematic Review. <i>Journal of Environmental Health and Sustainable Development</i> . 2021;6(4):1407-18.                                                                 | Wrong intervention    |
| 162. Nadimpalli SB, Hutchinson MK. An integrative review of relationships between discrimination and Asian American health. <i>Journal of Nursing Scholarship</i> . 2012;44(2):127-35.                                                                                     | Wrong study design    |
| 163. Nag T, Ghosh A. Cardiovascular disease risk factors in Asian Indian population: A systematic review. <i>Journal of Cardiovascular Disease Research</i> . 2013;4(4):222-8.                                                                                             | Wrong study design    |
| 164. Nair M, Prabhakaran D. Why do South Asians have high risk for CAD? <i>Global Heart</i> . 2012;7(4):307-14.                                                                                                                                                            | Wrong study design    |
| 165. Niedhammer I, Bertrais S, Witt K. Psychosocial work exposures and health outcomes: A meta-review of 72 literature reviews with meta-analysis. <i>Scandinavian Journal of Work, Environment and Health</i> . 2021;47(7):489-508.                                       | Wrong study design    |
| 166. Ntusi NBA, Mayosi BM. Aetiology and risk factors of peripartum cardiomyopathy: a systematic review. <i>International journal of cardiology</i> . 2009;131(2):168-79.                                                                                                  | Wrong study design    |
| 167. Ofori-Marfoh CD, Volgman C, Volgman A, Alexander S, Williams K. Race and socioeconomic status are strongly associated with racial disparities in cardiovascular health and outcomes in Chicago. <i>Circulation</i> . 2018;137(Supplement 1).                          | Abstract <sup>#</sup> |
| 168. Ohman RE, Yang EH, Abel ML. Inequity in Cardio-Oncology: Identifying Disparities in Cardiotoxicity and Links to Cardiac and Cancer Outcomes. <i>Journal of the American Heart Association</i> . 2021;10(24):e023852.                                                  | Wrong study design    |
| 169. Okeahialam BN. The Urban environment as a cardiovascular disease risk factor. <i>TAF Preventive Medicine Bulletin</i> . 2011;10(3):369-72.                                                                                                                            | Wrong study design    |
| 170. Oliveira G, Schimith MD, Silveira VdN. Fatores de risco cardiovascular em mulheres: revisão integrativa da literatura. <i>Enfermagem Brasil</i> . 2019;18(6):799-815.                                                                                                 | Wrong study design    |
| 171. Ortiz-Prado E, Cordovez SP, Vasconez E, Viscor G, Roderick P. Chronic high-altitude exposure and the epidemiology of ischaemic stroke: a systematic review. <i>BMJ open</i> . 2022;12(4):e051777.                                                                     | Wrong intervention    |



|                                                                                                                                                                                                                                                                                                                         |                             |
|-------------------------------------------------------------------------------------------------------------------------------------------------------------------------------------------------------------------------------------------------------------------------------------------------------------------------|-----------------------------|
| 172. Park JW, Mealy R, Saldanha IJ, Loucks EB, Needham BL, Sims M, et al. Multilevel resilience resources and cardiovascular disease in the United States: A systematic review and meta-analysis. <i>Health Psychology</i> . 2022;41(4):278-90.                                                                         | Duplicate                   |
| 173. Patil S, Phansalkar S. A systematic review on the studies of climate change and its effect on public health. <i>International Journal of Advanced Science and Technology</i> . 2019;28(16):106-18.                                                                                                                 | Wrong intervention          |
| 174. Pek PP, Blewer AL. Higher socioeconomic status is associated with lower in-hospital cardiac arrest: How can we address this socioeconomic inequality? <i>Resuscitation</i> . 2022;177:52-4.                                                                                                                        | Wrong outcome               |
| 175. Pollitt RA, Rose KM, Kaufman JS. Evaluating the evidence for models of life course socioeconomic factors and cardiovascular outcomes: a systematic review. <i>BMC public health</i> . 2005;5:7.                                                                                                                    | Not the scope of this study |
| 176. Power M, Roberts L, Cooke J, Chandrasekhar J. 543 Review of Frequency and Outcomes of Culturally and Linguistically Diverse Patients Presenting With Myocardial Infarction. <i>Heart Lung and Circulation</i> . 2020;29(Supplement 2):S281-S2.                                                                     | Wrong outcome               |
| 177. Prasad D, Kabir Z, Dash A, Das B. Abdominal obesity, an independent cardiovascular risk factor in Indian subcontinent: A clinico epidemiological evidence summary. <i>Journal of Cardiovascular Disease Research</i> . 2011;2(4):199-205.                                                                          | Wrong study design          |
| 178. Pullar J, Allen L, Townsend N, Williams J, Foster C, Roberts N, et al. The impact of poverty reduction and development interventions on non-communicable diseases and their behavioural risk factors in low and lower-middle income countries: A systematic review. <i>PloS one</i> . 2018;13(2):e0193378.         | Wrong intervention          |
| 179. Rabiei H, Ramezanifar S, Hassanipour S, Gharari N. Investigating the effects of occupational and environmental noise on cardiovascular diseases: a systematic review and meta-analysis. <i>Environmental Science and Pollution Research</i> . 2021;28(44):62012-29.                                                | Wrong intervention          |
| 180. Rahbar MH, Medrano M, Diaz-Garelli F, Gonzalez Villaman C, Saroukhani S, Kim S, et al. Younger age of stroke in low-middle income countries is related to healthcare access and quality. <i>Annals of clinical and translational neurology</i> . 2022;9(3):415-27.                                                 | Wrong outcome               |
| 181. Rau R, Buyken D. Current status of knowledge about health risk from mental workload: Evidence based on a systematic review of reviews. <i>Der aktuelle Kenntnisstand über Erkrankungsrisiken durch psychische Arbeitsbelastungen: Ein systematisches Review über Metaanalysen und Reviews</i> . 2015;59(3):113-29. | Wrong study design          |
| 182. Rosland A-M, Heisler M, Piette J. The impact of family behaviors and communication patterns on chronic illness outcomes: a systematic review. <i>Journal of Behavioral Medicine</i> . 2012;35(2):221-39.                                                                                                           | Wrong intervention          |
| 183. Saleem M, Durrani AK, Adeeb M, Siddique AR. Psychosocial risk factors of cardiovascular disease in Pakistani adolescents and young adults: A Systematic Review. <i>JPMA The Journal of the Pakistan Medical Association</i> . 2020;70(9):1601-4.                                                                   | Wrong intervention          |
| 184. Seddon ME, Marshall MN, Campbell SM, Roland MO. Systematic review of studies of quality of clinical care in general practice in the UK, Australia and New Zealand. <i>Quality in health care : QHC</i> . 2001;10(3):152-8.                                                                                         | Wrong outcome               |
| 185. Sedrez JA, Da Silva Kasten AP, De Oliveira Chaise F, Candotti CT. Risk factors for cardiovascular and musculoskeletal work-related diseases among prehospital emergency care workers: A systematic review. <i>Revista Brasileira de Medicina do Trabalho</i> . 2017;15(4):355-63.                                  | Wrong intervention          |
| 186. Shah KSV, Shah A, Bhopal R. Systematic review and meta-analysis of out of hospital cardiac arrest and race or ethnicity: Black U.S. Populations fare worse. <i>Journal of the American College of Cardiology</i> . 2012;59(13 SUPPL. 1):E1907.                                                                     | Duplicate                   |

|                                                                                                                                                                                                                                                                                            |                    |
|--------------------------------------------------------------------------------------------------------------------------------------------------------------------------------------------------------------------------------------------------------------------------------------------|--------------------|
| 187. Shah KSV, Shah ASV, Bhopal R. Systematic review and meta-analysis of out-of-hospital cardiac arrest and race or ethnicity: black US populations fare worse. <i>European journal of preventive cardiology</i> . 2014;21(5):619-38.                                                     | Wrong outcome      |
| 188. Shah N, Marie-Mitchell A. Socioeconomic factors impact the influence of adverse childhood experiences on health outcomes. <i>Journal of Investigative Medicine</i> . 2019;67(1):190.                                                                                                  | Abstract           |
| 189. Shahid I, Usman MS, Dadabhoy R, Shurjeel Q, Kumar P, Siddiqi TJ. Meta-Analysis of Racial Disparity in Outcomes of Acute Myocardial Infarction. <i>The American journal of cardiology</i> . 2022;176:139-41.                                                                           | Wrong outcome      |
| 190. Shaikh K, Nakanishi R, Kim N, Budoff MJ. Coronary artery calcification and ethnicity. <i>Journal of Cardiovascular Computed Tomography</i> . 2019;13(6):353-9.                                                                                                                        | Wrong outcome      |
| 191. Shor E, Roelfs D. Climate shock: Moving to colder climates and immigrant mortality. <i>Social science &amp; medicine (1982)</i> . 2019;235:112397.                                                                                                                                    | Wrong intervention |
| 192. Shor E, Roelfs D, Vang ZM. The "Hispanic mortality paradox" revisited: Meta-analysis and meta-regression of life-course differentials in Latin American and Caribbean immigrants' mortality. <i>Social Science and Medicine</i> . 2017;186:20-33.                                     | Wrong intervention |
| 193. Simoni JM, Smith L, Oost KM, Lehavot K, Fredriksen-Goldsen K. Disparities in Physical Health Conditions Among Lesbian and Bisexual Women: A Systematic Review of Population-Based Studies. <i>Journal of homosexuality</i> . 2017;64(1):32-44.                                        | Wrong intervention |
| 194. Smaardijk VR, Lodder P, Kop WJ, Maas A, Mommersteeg P. Sex and gender-sensitive risks of psychosocial factors for ischemic heart disease incidence and prognosis: A systematic review and meta-analysis. <i>Psychosomatic Medicine</i> . 2018;80(3):A63-A4.                           | Duplicate*         |
| 195. Smaardijk VR, Lodder P, Kop WJ, van Gennep B, Maas AH, Mommersteeg PM. Sex-and gender-stratified risks of psychological factors for incident ischemic heart disease: systematic review and meta-analysis. <i>Journal of the American Heart Association</i> . 2019;8(9):e010859.       | Wrong outcome      |
| 196. Sohail QZ, Chu A, Rezai MR, Donovan LR, Ko DT, Tu JV. The Risk of Ischemic Heart Disease and Stroke Among Immigrant Populations: A Systematic Review. <i>The Canadian journal of cardiology</i> . 2015;31(9):1160-8.                                                                  | Wrong intervention |
| 197. Spyrou AT, Aggelopoulou Z, Trikilis J, Mystakidou K. Psychological support and coronary heart disease patients outcomes. <i>European Heart Journal: Acute Cardiovascular Care</i> . 2013;2(SUPPL. 1):124.                                                                             | Wrong study design |
| 198. Steptoe A, Kivimäki M. Stress and cardiovascular disease: An update on current knowledge. 2013. p. 337-54.                                                                                                                                                                            | Wrong study design |
| 199. Stubbs A, Szoeki C. The Effect of Intimate Partner Violence on the Physical Health and Health-Related Behaviors of Women: A Systematic Review of the Literature. <i>Trauma, violence &amp; abuse</i> . 2021:1524838020985541.                                                         | Assess only burden |
| 200. Sun Z, Chen C, Xu D, Li T. Effects of ambient temperature on myocardial infarction: A systematic review and meta-analysis. <i>Environmental pollution (Barking, Essex : 1987)</i> . 2018;241:1106-14.                                                                                 | Wrong intervention |
| 201. Swiatoniowska-Lonc NA, Slawuta A, Dudek K, Jankowska K, Jankowska-Polanska BK. The impact of health education on treatment outcomes in heart failure patients. <i>Advances in clinical and experimental medicine : official organ Wroclaw Medical University</i> . 2020;29(4):481-92. | Wrong intervention |

|                                                                                                                                                                                                                                                                               |                    |
|-------------------------------------------------------------------------------------------------------------------------------------------------------------------------------------------------------------------------------------------------------------------------------|--------------------|
| 202. Tang K, Rashid R, Ghali WA. Association between subjective social status and cardiovascular disease and cardiovascular risk factors: A systematic review and meta-analysis. <i>Journal of General Internal Medicine</i> . 2015;30(SUPPL. 2):S104-S5.                     | Duplicate          |
| 203. Taouk Y, Spittal MJ, LaMontagne AD, Milner AJ. Psychosocial work stressors and risk of all-cause and coronary heart disease mortality: A systematic review and meta-analysis. <i>Scandinavian Journal of Work, Environment &amp; Health</i> . 2020;46(1):19-31.          | Wrong intervention |
| 204. Tay L, Tan K, Diener E, Gonzalez E. Social relations, health behaviors, and health outcomes: a survey and synthesis. <i>Applied psychology Health and well-being</i> . 2013;5(1):28-78.                                                                                  | Wrong study design |
| 205. Te Vazquez J, Feng SN, Orr CJ, Berkowitz SA. Food Insecurity and Cardiometabolic Conditions: a Review of Recent Research. <i>Current nutrition reports</i> . 2021;10(4):243-54.                                                                                          | Wrong study design |
| 206. Thomas MK, Lammert LJ, Beverly EA. Food Insecurity and its Impact on Body Weight, Type 2 Diabetes, Cardiovascular Disease, and Mental Health. <i>Current Cardiovascular Risk Reports</i> . 2021;15(9):15.                                                                | Wrong study design |
| 207. Thompson D, Reid J, Ski C. Psychological interventions for patients with coronary heart disease and their partners: A systematic review. <i>Cardiology (Switzerland)</i> . 2013;126(SUPPL. 2):173.                                                                       | Wrong outcome*     |
| 208. Tweed EJ, Sumpter C, Thomson R, Lewer D, Southworth P, Kirolos A, et al. THE HEALTH OF PEOPLE EXPERIENCING MULTIPLE FORMS OF SOCIAL EXCLUSION: A SYSTEMATIC REVIEW. <i>Journal of Epidemiology and Community Health</i> . 2019;73(Supplement 1):A20-A1.                  | Wrong outcome*     |
| 209. Ugowe FE, Jackson LR, 2nd, Thomas KL. Racial and ethnic differences in the prevalence, management, and outcomes in patients with atrial fibrillation: A systematic review. <i>Heart rhythm</i> . 2018;15(9):1337-45.                                                     | Wrong study design |
| 210. van Nieuwenhuizen BP, Oving I, Kunst AE, Daams J, Blom MT, Tan HL, et al. Socio-economic differences in incidence, bystander cardiopulmonary resuscitation and survival from out-of-hospital cardiac arrest: A systematic review. <i>Resuscitation</i> . 2019;141:44-62. | Wrong outcome      |
| 211. Virtanen M, Heikkila K, Jokela M, Ferrie JE, Batty GD, Vahtera J, et al. Long working hours and coronary heart disease: A systematic review and meta-analysis. <i>American Journal of Epidemiology</i> . 2012;176(7):586-96.                                             | Wrong intervention |
| 212. Vitalis A, Lip GYH, Kay M, Vohra RK, Shantsila A. Ethnic differences in the prevalence of peripheral arterial disease: a systematic review and meta-analysis. <i>Expert review of cardiovascular therapy</i> . 2017;15(4):327-38.                                        | Assess only burden |
| 213. Wang X, Cao Y, Hong D, Zheng D, Richtering S, Sandset EC, et al. Ambient temperature and stroke occurrence: A systematic review and meta-analysis. <i>International Journal of Environmental Research and Public Health</i> . 2016;13(7).                                | Wrong intervention |
| 214. Weilhammer V, Schmid J, Mittermeier I, Schreiber F, Jiang L, Pastuhovic V, et al. Extreme weather events in Europe and their health consequences – A systematic review. <i>International Journal of Hygiene and Environmental Health</i> . 2021;233.                     | Wrong intervention |
| 215. Welton NJ, Caldwell DM, Adamopoulos E, Vedhara K. Mixed treatment comparison meta-analysis of complex interventions: Psychological interventions in coronary heart disease. <i>American Journal of Epidemiology</i> . 2009;169(9):1158-65.                               | Wrong intervention |
| 216. Winter-Smith J, Selak V, Harwood M, Ameratunga S, Grey C. Cardiovascular disease and its management among Pacific people: a systematic review by ethnicity and place of birth. <i>BMC cardiovascular disorders</i> . 2021;21(1):515.                                     | Assess only burden |
| 217. Woods JA, Katzenellenbogen JM, Davidson PM, Thompson SC. Heart failure among Indigenous Australians: A systematic review. <i>BMC Cardiovascular Disorders</i> . 2012;12(1).                                                                                              | Wrong intervention |

|                                                                                                                                                                                                                                                                                    |                    |
|------------------------------------------------------------------------------------------------------------------------------------------------------------------------------------------------------------------------------------------------------------------------------------|--------------------|
| 218. Woodward M, Peters SAE, Batty GD, Ueshima H, Woo J, Giles GG, et al. Socioeconomic status in relation to cardiovascular disease and cause-specific mortality: a comparison of Asian and Australasian populations in a pooled analysis. <i>BMJ open</i> . 2015;5(3):e006408.   | Wrong study design |
| 219. Worrall-Carter L, Edward K-L, Page K. Women and cardiovascular disease: at a social disadvantage? <i>Collegian</i> . 2012;19(1):33-7.                                                                                                                                         | Wrong study design |
| 220. Xiaoyue L, Logan J, Alhusen J. Cardiovascular Risk and Outcomes in Women Who Have Experienced Intimate Partner Violence: An Integrative Review. <i>Journal of Cardiovascular Nursing</i> . 2020;35(4):400-14.                                                                 | Wrong study design |
| 221. Xibei BL, Ayatollahi Y, Takashi Y, Jaradat M, Shen JJ, Sun Jung K, et al. Health Literacy and Mortality in Patients With Heart Failure: A Systematic Review and Meta-Analysis. <i>Research in Gerontological Nursing</i> . 2019;12(2):1-10.                                   | Wrong outcome      |
| 222. Xu H, Wen LM, Rissel C. The relationships between active transport to work or school and cardiovascular health or body weight: A systematic review. <i>Asia-Pacific Journal of Public Health</i> . 2013;25(4):298-315.                                                        | Wrong intervention |
| 223. Zhang TN, Wu QJ, Liu YS, Lv JL, Sun H, Chang Q, et al. Environmental Risk Factors and Congenital Heart Disease: An Umbrella Review of 165 Systematic Reviews and Meta-Analyses With More Than 120 Million Participants. <i>Frontiers in Cardiovascular Medicine</i> . 2021;8. | Wrong study design |
| 124. Lago-Peñas S, Rivera B, Cantarero D, Casal B, Pascual M, Blázquez-Fernández C, et al. The impact of socioeconomic position on non-communicable diseases: what do we know about it? <i>Perspectives in Public Health</i> . 2021;141(3):158-76.                                 | Wrong study design |
| 125. LaFave S, Suen J, Seau Q, Bergman A, Fisher M, Thorpe R, et al. Racism and Older Black Americans' Health: a Systematic Review. <i>Journal of Urban Health</i> . 2022:1-27.                                                                                                    | Wrong outcome      |

Abstract includes meeting, poster, oral, and concurrent session abstracts; \*initially abstract-only review but full text found through hand search or from the author; \*\* initially abstract-only review and two papers from the author (both were not eligible); #, unpublished (information from the author) abstracts.

**Table S4. General characteristics of the included systematic reviews and meta-analyses.**

| Study details                                          |                                                             |                                                   | Search details                                   |                                                                             |                                                                                                                                 |                                                        | Type of SDOH & CVD assessed             |                     | Quality                                                          |
|--------------------------------------------------------|-------------------------------------------------------------|---------------------------------------------------|--------------------------------------------------|-----------------------------------------------------------------------------|---------------------------------------------------------------------------------------------------------------------------------|--------------------------------------------------------|-----------------------------------------|---------------------|------------------------------------------------------------------|
| Author/ year                                           | Year of publication for included studies (last search date) | Population (age); Sample size (% male)            | Databases searched (n); the name the of database | The number of primary articles included; systematic reviews (Meta Analyses) | Countries (n); the name of countries                                                                                            | Study designs                                          | Exposure                                | Outcome             | Quality Appraisal Tool for primary studies                       |
| <b>Economic stability (total number of reviews=25)</b> |                                                             |                                                   |                                                  |                                                                             |                                                                                                                                 |                                                        |                                         |                     |                                                                  |
| Agisilaou 2020 <sup>42</sup>                           | 2010-2020 (January 2020)                                    | General reproductive age women; 11-7,156,393 (NR) | 2; Medline and CINHAL                            | 24 (NA)                                                                     | 14; USA, Denmark, Australia, Taiwan, Canada, Israel, Pakistan, Ireland, China, Nigeria, Japan, Korea, Singapore, and Indonesia. | Case-control, Cohort, cross-sectional, and case study. | Composite SES and Monthly earnings      | Cardiomyopathy      | Effective public health practice project quality assessment tool |
| Allan 2017 <sup>75</sup>                               | NR (October 1, 2015)                                        | General population (NR); 20,420,175 (NR)          | 1; PubMed                                        | 73 (NA)                                                                     | 10; Denmark, Taiwan, Japan, Sweden, Iceland, USA, Netherlands, Norway,                                                          | Prospective cohort                                     | SES (Education, occupation, and income) | Atrial fibrillation | NR                                                               |

|                                 |                               |                                                                                                |                               |          |                                                                                                                                                        |                            |                                                                 |                                                            |     |
|---------------------------------|-------------------------------|------------------------------------------------------------------------------------------------|-------------------------------|----------|--------------------------------------------------------------------------------------------------------------------------------------------------------|----------------------------|-----------------------------------------------------------------|------------------------------------------------------------|-----|
|                                 |                               |                                                                                                |                               |          | Australia, and Germany                                                                                                                                 |                            |                                                                 |                                                            |     |
| Al-Shakarchi 2020 <sup>88</sup> | 1988-2016 (December 31, 2018) | General population (adult); 28-28,033 (55-100%)                                                | 1; Embase                     | 17 (9)   | 7; USA, Canada, Sweden, Scotland, Netherlands, Finland, and Poland                                                                                     | case-control and Cohort    | Homelessness                                                    | CVD                                                        | NOS |
| Backholer 2017 <sup>81</sup>    | NR (September 14, 2015)       | General population (all age groups); around 22 million individuals (38-71%, for reported only) | 1; PubMed                     | 44 (44)  | 18; Asia, France, Australia, Denmark, UK, Norway, Netherlands, Sweden, Spain, Finland, Israel, Japan, Italy, Russia, India, Europe, Australia, and USA | Cohort                     | SES (area-level deprivation, education, occupation, and income) | Coronary heart disease, Stroke, and cardiovascular disease | NOS |
| Birhanu 2022 <sup>83</sup>      | 2003-2021 (August 2021)       | General population (adults); 1034-461,211 (0-100%)                                             | 6; Medline, Embase, PsycINFO, | 130 (36) | 4 (China, Republic of Korea, LICs & HICs, Turkish, India) + LICs & HICs+MICs                                                                           | Prospective cohort studies | Education and occupation                                        | CVD                                                        | NOS |

|                                     |                       |                                                  |                                                                            |         |                                                                                                       |                         |                                   |                                |                                                             |
|-------------------------------------|-----------------------|--------------------------------------------------|----------------------------------------------------------------------------|---------|-------------------------------------------------------------------------------------------------------|-------------------------|-----------------------------------|--------------------------------|-------------------------------------------------------------|
|                                     |                       |                                                  | Web of Science, Scopus, and CINHAL                                         |         |                                                                                                       |                         |                                   |                                |                                                             |
| Eller 2009 <sup>66</sup>            | 1977-2008 (NR)        | General population (adults); 300-958,096(0-100%) | 1; Medline                                                                 | 33 (NA) | 11 countries: Denmark, Finland, USA, England, Germany, Belgium, Japan, Belgium, France, Spain, Sweden | Cohort and case-control | Job insecurity                    | Coronary heart disease         | Assessed (quality assessment criteria developed by authors) |
| Gonzalez 1998 <sup>62</sup>         | 1960-1993 (1993)      | General population (adults); 195->1000000 (0-NR) | 4; Index Medicus, Medline, Sociological Abstracts, Social Scisearch        | 34 (NA) | 9; USA, UK, Sweden, Denmark, Finland, Netherlands, Belgium, Russia, and India.                        | Cohort and case-control | Educational status and Occupation | Ischemic Heart Disease         | NR                                                          |
| Salgado-Barreira 2014 <sup>43</sup> | 1983-2010 (June 2012) | Urban population; NR (NR)                        | 5; Medline, Embase, IME (Spanish Media Index), ICYT (Index of Sciences and | 24 (NA) | 12; Ireland, Australia, Spain, Panama, USA, Netherlands, Brazil, England, China, India,               | Ecological study        | SES                               | Mortality due to Heart disease | NOS                                                         |

|                            |                            |                                                      |                                                                  |         |                                                                                                       |                                     |                      |                                                                               |     |
|----------------------------|----------------------------|------------------------------------------------------|------------------------------------------------------------------|---------|-------------------------------------------------------------------------------------------------------|-------------------------------------|----------------------|-------------------------------------------------------------------------------|-----|
|                            |                            |                                                      | Technologies), and ISOC (Index of Social Science and Humanities) |         | Canada, Argentina                                                                                     |                                     |                      |                                                                               |     |
| Hawkins 2012 <sup>74</sup> | 1996-2011 (NR)             | General population (adults), 128-114,917 (NR)        | 4; PubMed, Embase, CINAHL, and the Cochrane Library              | 28 (NA) | 11; Sweden, Denmark, USA, Scotland, Canada, Italy, Japan, England, Brazil, Spain, and the Netherlands | Cohort and repeated cross-sectional | SES                  | Heart Failure                                                                 | NR  |
| Kerr 2011 <sup>73</sup>    | 1980-2008 (September 2008) | General population (adult); 1,165-60, 518 (NR-100%)  | 3; Embase, Medline, and the Cochrane Library                     | 17 (12) | 10; USA, China, Finland, Sweden, New Zealand, Scotland, England, Netherlands, Israel, and Italy       | cohort and case-control studies     | SES                  | stroke incidence (fatal or non-fatal)                                         | NR  |
| Khaing 2017 <sup>80</sup>  | 1982–2016 (July 31, 2016)  | General population (Adult); 128-4,157,202 (35.9-78%) | 2; Medline and Scopus                                            | 72 (72) | 13; Australia, USA, Germany, Japan, Sweden, Finland, Denmark, Netherlands, Lithuania,                 | Cohort                              | Education and income | CVD, Myocardial infarction, Coronary heart disease, stroke, and CVD mortality | NOS |



|                                    |                           |                                                    |                                         |                                          |                                                                                                                                                    |                                                   |                                                               |                                                                                                                                        |          |
|------------------------------------|---------------------------|----------------------------------------------------|-----------------------------------------|------------------------------------------|----------------------------------------------------------------------------------------------------------------------------------------------------|---------------------------------------------------|---------------------------------------------------------------|----------------------------------------------------------------------------------------------------------------------------------------|----------|
|                                    |                           |                                                    |                                         |                                          | Greece, India, Iran, and Vietnam                                                                                                                   |                                                   |                                                               |                                                                                                                                        |          |
| Lee 2021 <sup>61</sup>             | 2009-2019<br>(July 2019)  | General population (adult), 91->1 billion (0-100%) | 4; PubMed, CINAHL, EMBASE, and Cochrane | 42 (NA)                                  | 1; South Korea                                                                                                                                     | Cross-sectional, Cohort, and matched case-control | SES (Education, income, occupation, geographical Environment) | CVD (acute myocardial infarction, Stroke, cerebrovascular disease) and 10-year mortality from (AMI, congestive heart failure, and CVD) | JBI tool |
| Manrique-Garcia 2011 <sup>79</sup> | 1996-2009<br>(April 2009) | General population (adults); 81 – 2,693,384 (NR)   | 2; PubMed and Embase                    | 65 articles and 70 original studies (70) | 21; Sweden, Italy, Denmark, Czech Republic, Netherlands, Lithuania, England, Argentina, USA, Germany, Pakistan, Costa Rica, Japan, Greece, France, | Case-control and Cohort                           | SES (Education, occupation, and income)                       | Acute myocardial infarction                                                                                                            | NR       |

|                                   |                             |                                                                       |                                                                 |         |                                                 |                                               |                                         |                                                                                                       |                                       |
|-----------------------------------|-----------------------------|-----------------------------------------------------------------------|-----------------------------------------------------------------|---------|-------------------------------------------------|-----------------------------------------------|-----------------------------------------|-------------------------------------------------------------------------------------------------------|---------------------------------------|
|                                   |                             |                                                                       |                                                                 |         | Finland, Spain, India, Brazil, Iran, and Canada |                                               |                                         |                                                                                                       |                                       |
| McHutchison 2017 <sup>78</sup>    | 1990-2015 (November 2015)   | General population (adult); 112-1,135,383 (NR)                        | 3; Medline, PsycINFO, and Embase                                | 90 (90) | NR; NR                                          | NR                                            | Education                               | later life stroke                                                                                     | Assessed/ tool not specified          |
| MorettiAnfosi 2022 <sup>86</sup>  | 1982-2020 (May 26, 2020)    | General population (adults); NR (NR)                                  | 6; Embase Medline, PubMed, Scopus, Web of Science, APA PsycInfo | 86 (NA) | 3 regions; North America, Europe, and Asia      | Case-control and cohort                       | Job insecurity                          | Cerebrovascular disease and Ischemic heart disease                                                    | Navigation Guide Tool                 |
| Parekh 2022 <sup>57</sup>         | 2010-2021 (June 1, 2021)    | General population (adults); 445-1,852,790 (44-87, for reported only) | 1; PubMed/Medline                                               | 19 (NA) | 1; USA                                          | Cross-sectional and Cohort                    | housing instability and Food insecurity | Ischemic heart disease, Cardiomyopathy, stroke, Coronary heart disease, CVD, CVD and Stroke mortality | Study Quality Assessment Tools (SQAT) |
| Saif-Ur-Rahman 2021 <sup>84</sup> | 2004-2021 (August 15, 2015) | Diabetic and those at risk of diabetes (adults); (48-4,398,117)       | 3; PubMed, Web of Science, and Cochrane library                 | 5 (NA)  | 5; Finland, USA, Singapore, Sweden, and         | Cross-sectional, Comparative Cross-sectional, | Occupation                              | Ischemic heart disease, Stroke, and CVD mortality                                                     | JBI quality assessment tool           |

|                                  |                                                          |                                                                                                   |                                                                                     |                                 |                                                                                     |                                     |                                                         |                                                                |     |
|----------------------------------|----------------------------------------------------------|---------------------------------------------------------------------------------------------------|-------------------------------------------------------------------------------------|---------------------------------|-------------------------------------------------------------------------------------|-------------------------------------|---------------------------------------------------------|----------------------------------------------------------------|-----|
|                                  |                                                          |                                                                                                   |                                                                                     |                                 | the Republic of Korea                                                               | and Cohort study                    |                                                         |                                                                |     |
| Theorell 2016 <sup>87</sup>      | 1985-2014(December 2014)                                 | General population (adult); 149-2,945,078 (0%-100%)                                               | 3; PubMed, Embase, and PsycInfo                                                     | 96 (NA)                         | More than 52 countries; All regions/including Africa                                | Case-control and prospective Cohort | Job insecurity                                          | Fatal Coronary heart disease, myocardial infarction and angina | NR  |
| Vathesatogkit 2014 <sup>76</sup> | 1996-2013 (May 2013)                                     | General population (Adult); 1245-575,377 (1370 023 individuals and 71, 818 total deaths) (0-100%) | 5; PubMed, Embase, CINAHL, Social Science Research Network and the Cochrane Library | 45 (30)                         | 9; China, Bangladesh, India, Korea, Japan, Taiwan, Vietnam, Thailand, and Singapore | Cohort                              | SES (Education, income, occupation)                     | CVD mortality                                                  | NR  |
| Virtanen 2013 <sup>85</sup>      | 1982-2004 (better to say a year of study) (October 2012) | General population (Adults); 263-36,910 (0%-100%)                                                 | 2; Medline and Embase                                                               | 4+ 13 unpublished datasets (15) | 6; German, Finland, Denmark, USA, Sweden, and Belgium                               | Prospective design (cohort study)   | Job insecurity                                          | Incidence of Coronary heart disease                            | NR  |
| Wang 2020 <sup>71</sup>          | 1982-2017 (July 2017)                                    | General population (all age groups); 806- 30, 235,757 (NR-100%)                                   | 3; Medline, Embase, and Web of Science                                              | 27 (27)                         | 12 (Australia, Finland, Canada, China, Sweden, Italy, Denmark, New Zealand, USA,    | prospective cohort                  | SES (as a composite, Education, occupation, and income) | stroke mortality (ischemic stroke and hemorrhagic stroke)      | NOS |

|                             |                            |                                     |                                                                                                        |         |                                                                                                                                                                                                                  |                                                   |                                                        |                                                   |     |
|-----------------------------|----------------------------|-------------------------------------|--------------------------------------------------------------------------------------------------------|---------|------------------------------------------------------------------------------------------------------------------------------------------------------------------------------------------------------------------|---------------------------------------------------|--------------------------------------------------------|---------------------------------------------------|-----|
|                             |                            |                                     |                                                                                                        |         | UK, Argentina, and Korea) and multi-country study from the European region                                                                                                                                       |                                                   |                                                        |                                                   |     |
| Williams 2018 <sup>24</sup> | 1990-2015 (April 27, 2015) | General population; 35-148,173 (NR) | 6; Medline, Embase, Global Health, Web of Science Core Collection, Global Health Library, and ProQuest | 57 (NA) | 17; Ethiopia, Kosovo, Kenya, Nigeria, Mongolia, India, Tanzania, Uganda, EL Salvador, Guatemala, Honduras, Indonesia, Vietnam, Morocco, Pakistan, Bangladesh, and Burkina Faso. Also, countries in Low and LMIC. | Cross-sectional, cohort studies, and Case-control | SES (Education, income, occupation, and composite SES) | Stroke, Angina, CVD, CAD, IHD, and CVD mortality. | NOS |

|                           |                                 |                                                                                                                                      |                             |         |                                                                                  |                                           |                                                                                                                              |                                  |                           |
|---------------------------|---------------------------------|--------------------------------------------------------------------------------------------------------------------------------------|-----------------------------|---------|----------------------------------------------------------------------------------|-------------------------------------------|------------------------------------------------------------------------------------------------------------------------------|----------------------------------|---------------------------|
| Potter 2019 <sup>77</sup> | 2001-2018<br>(August 2018)      | General population (adult);2314-3,992,417 (37.3%/NR-100%)                                                                            | 2; Medline and Embase       | 14 (11) | 6; USA, UK, Denmark, Sweden, Scotland, and Israel                                | Cohort and randomised control trial       | SES (Education, poverty, Neighborhood deprivation index, Index of multiple deprivation, Income, Occupation, Carstairs index) | Incident Heart Failure           | NOS                       |
| Lunde 2018 <sup>82</sup>  | 2000-2017<br>(January 19, 2018) | General population (all age groups); 204-Unknown (all Danish or Swedish population aged 35-84 and 25-74 years, respectively) (0%-NR) | 2; Medline and Embase       | 12 (NA) | 9; USA, Sweden, Denmark, Italy, Scotland, Ireland, Belgium, China, and Australia | Cohort, cross-sectional, and case-control | SES (Education and family income)                                                                                            | Atrial fibrillation              | Cochrane tool             |
| Tang 2016 <sup>72</sup>   | 2008-2013<br>(July 2015)        | General population (adult); 981 to                                                                                                   | 7; PubMed, Medline, Embase, | 10 (9)  | 6; USA, England, china, japan, South                                             | Cross-sectional                           | Subjective Social Status                                                                                                     | Angina and Myocardial infarction | Assessed (Author-defined) |

|                                                                  |                              |                                                        |                                                   |         |                                                                        |                    |                                            |                                              |                                       |  |
|------------------------------------------------------------------|------------------------------|--------------------------------------------------------|---------------------------------------------------|---------|------------------------------------------------------------------------|--------------------|--------------------------------------------|----------------------------------------------|---------------------------------------|--|
|                                                                  |                              | 8152 (26.8-66)                                         | CINAHL, PsycINFO, SocINDEX, and Web of Science    |         | Korea, and Taiwan                                                      | and longitudinal   |                                            |                                              | quality assessment criteria)          |  |
| <b>Social and community context (total number of reviews=26)</b> |                              |                                                        |                                                   |         |                                                                        |                    |                                            |                                              |                                       |  |
| Agisilaou 2020 <sup>42</sup>                                     | Stated above                 |                                                        |                                                   |         |                                                                        |                    | Ethnicity                                  | Stated above                                 |                                       |  |
| Allan 2017 <sup>75</sup>                                         | Stated above                 |                                                        |                                                   |         |                                                                        |                    | Ethnicity                                  | Stated above                                 |                                       |  |
| Barth 2010 <sup>67</sup>                                         | 1992-2007 (March 2007)       | General population (adult); 194-45,414 (51.5-100%)     | 4; Medline, PsycInfo, PSYNDEX, and Web of Science | 32 (25) | 6 + 1 international; Sweden, USA, Netherlands, UK, Belgium, and Canada | Prospective Cohort | Social support (functional and structural) | Myocardial infarction and cardiac mortality  | NR                                    |  |
| Chin 2020 <sup>92</sup>                                          | 1984-2017 (June 2018)        | General population (adult); 327-76, 362 (0%-100%)      | 2; PsycINFO and PubMed                            | 19 (NA) | 5; USA, Finland, Sweden, Russia, and Denmark                           | Prospective Cohort | Social role                                | Stroke, Heart failure, CVD and CVD mortality | Assessed but the tool is not reported |  |
| Choi 2014 <sup>93</sup>                                          | 1979-2013 (October 08, 2012) | General population (all age groups); 7217-2805679 (NR) | 3; Medline, Embase, and PsycINFO                  | 13 (NA) | 14; USA, UK, Finland, Sweden, Japan, New Zealand, and the Netherlands  | prospective Cohort | Social capital                             | CVD mortality                                | NR                                    |  |

|                                     |                           |                                                            |                                                |         |                                          |                                          |                    |                                                         |                                                                                  |
|-------------------------------------|---------------------------|------------------------------------------------------------|------------------------------------------------|---------|------------------------------------------|------------------------------------------|--------------------|---------------------------------------------------------|----------------------------------------------------------------------------------|
| Cortes-Bergoderi 2013 <sup>55</sup> | 1950-2009 (May 2013)      | General population (NR); 3765-32,109,620 (NR)              | 4; Embase, Medline, Web of Science, and Scopus | 18 (18) | 1; USA                                   | Cohort                                   | Ethnicity          | CVD mortality                                           | The modified tool recommended by Stroup and colleagues <sup>#</sup>              |
| Eller 2009 <sup>66</sup>            | Stated above              |                                                            |                                                |         |                                          |                                          | Social support     |                                                         |                                                                                  |
| Ezzatvar 2021 <sup>69</sup>         | 1996-2020 (May 2021)      | Patients with diabetics (adults); 267-443,932 (33.2%-100%) | 2; PubMed and Embase                           | 23 (21) | 4; USA, Canada, UK, and New Zealand      | Prospective Cohort                       | Ethnicity          | CVD, stroke, Coronary artery disease, and Heart Failure | The Quality Assessment Tool for Observational Cohort and Cross-sectional Studies |
| Francis 2015 <sup>98</sup>          | 1964-2013 (NR)            | General population (adult); 227-4,000,198 (NR)             | 4; Medline, CENTRAL, LILACS, and PsycINFO      | 22 (NA) | 4; UK, USA, Jamaica, Trinidad and Tobago | Cross-sectional, cohort, and case series | Ethnicity          | Ischemic heart disease mortality                        | NR                                                                               |
| Freak-Poli 2022 <sup>68</sup>       | 2003-2020 (June 21, 2020) | General population (adult); 2,805-11,637 (0-48.1%)         | 4; Embase, Medline, Web of Science, and Scopus | 5 (4)   | 2; Australia and New Zealand             | Cohort                                   | Poor social health | Coronary heart disease and Stroke                       | NOS                                                                              |
| Ho 2021 <sup>47</sup>               | 2001-2019 (August 2021)   | Persons with chronic kidney                                | 7; Medline, Embase, CINAHL, Global             | 10 (10) | 1; Australia                             | Cohort (prospective and                  | Ethnicity          | Peripheral arterial disease                             | STROBE statement                                                                 |

|                             |                                 |                                                                                                                                              |                                                                                                                                                                                        |                                            |                                                                                                                                |                                            |                |                                                                                         |     |
|-----------------------------|---------------------------------|----------------------------------------------------------------------------------------------------------------------------------------------|----------------------------------------------------------------------------------------------------------------------------------------------------------------------------------------|--------------------------------------------|--------------------------------------------------------------------------------------------------------------------------------|--------------------------------------------|----------------|-----------------------------------------------------------------------------------------|-----|
|                             |                                 | disease (NR);<br>89 – 6285<br>(50-64%)                                                                                                       | Health Library,<br>Allied and<br>Complementary<br>Medicine<br>Database, and<br>ProQuest<br>Dissertations and<br>Theses<br>Global for articles<br>and grey<br>literature, and<br>PubMed |                                            |                                                                                                                                | retrospective<br>) and cross-<br>sectional |                |                                                                                         |     |
| Jin 2015 <sup>97</sup>      | 2001-2013<br>(December<br>2014) | General<br>population (all<br>ages except<br>children); NR<br>(NR-100%)                                                                      | 6; PubMed,<br>PsycInfo,<br>CINAHL, Scopus,<br>Web of<br>Science, and<br>Cochrane library                                                                                               | 8 (8)                                      | 5; Scotland,<br>Sweden,<br>Canada, USA,<br>and<br>Netherlands                                                                  | Cohort                                     | Ethnicity      | Coronary heart<br>disease                                                               | NOS |
| Kuper 2002<br><sup>63</sup> | 1964-2001<br>(June 2021)        | General<br>population for<br>etiologic study<br>and people<br>with CVD for<br>prognostic<br>studies<br>(adult); 104-<br>33,999 (0%-<br>100%) | 2; Science<br>Citation Index<br>and PubMed;<br>simply<br>bibliographic<br>search                                                                                                       | 70<br>etiologic/92<br>prognostics#<br>(NA) | 15; UK,<br>Finland, USA,<br>Denmark,<br>Lithuania,<br>Netherlands,<br>Scotland,<br>Australia,<br>Canada,<br>Sweden,<br>German, | Prospective<br>cohort                      | Social support | Coronary heart<br>disease,<br>Myocardial<br>infarction, heart<br>Failure, and<br>angina | NR  |



|                          |                                     |                                                                           |                                                                                                                       |         |                                               |                                                                                                     |                                                                                                                                                         |                                                            |                                              |
|--------------------------|-------------------------------------|---------------------------------------------------------------------------|-----------------------------------------------------------------------------------------------------------------------|---------|-----------------------------------------------|-----------------------------------------------------------------------------------------------------|---------------------------------------------------------------------------------------------------------------------------------------------------------|------------------------------------------------------------|----------------------------------------------|
|                          |                                     |                                                                           |                                                                                                                       |         | Belgium,<br>Switzerland,<br>Italy, and Israel |                                                                                                     |                                                                                                                                                         |                                                            |                                              |
| Panza 2019 <sup>56</sup> | 1984-2017<br>(February<br>2018)     | Socially<br>stigmatised<br>people<br>(adult); 27-<br>26,991 (0%-<br>100%) | 7; PubMed,<br>PsycINFO,<br>CINAHL,<br>Sociological<br>Abstracts,<br>Academic Search<br>Premier, Scopus,<br>and EMBASE | 84 (NA) | 1; USA                                        | Cross-<br>sectional,<br>longitudinal<br>and<br>experimental<br>, and<br>randomised<br>control trail | Perceived<br>discrimination                                                                                                                             | CVD and<br>Myocardial<br>infarction                        | NOS and<br>Cochrane<br>collaboration<br>tool |
| Park 2021 <sup>58</sup>  | 1983-2019<br>(September<br>2020)    | General<br>population<br>(adults);<br>1,122-92,395<br>(NR-100%)           | 4; PubMed,<br>Embase,<br>CINAHL, and<br>PsycINFO                                                                      | 13 (6)  | 1; USA                                        | Prospective<br>cohort                                                                               | Social Network<br>(Interpersonal-<br>Level<br>Resilience<br>Resources)<br>and social<br>cohesion<br>(Neighborhood-<br>Level<br>Resilience<br>Resources) | Coronary heart<br>disease,<br>Stroke, and<br>CVD mortality | ROBINS-I<br>tool                             |
| Park 2022 <sup>51</sup>  | 2012-2021<br>(September 1,<br>2021) | HIV/AIDS<br>patients (15<br>and above);<br>80-30,533<br>(>80%)            | 5; PubMed,<br>Embase,<br>Medline,<br>Cochrane library,<br>and Google<br>Scholar                                       | 7 (7)   | 2; USA and<br>Taiwan                          | Retrospectiv<br>e and cross-<br>sectional                                                           | Ethnicity                                                                                                                                               | Atrial fibrillation                                        | NR                                           |

|                                 |                              |                                                             |                                                                                |          |                                                                                                                    |                                                                              |                      |                                                             |                                       |
|---------------------------------|------------------------------|-------------------------------------------------------------|--------------------------------------------------------------------------------|----------|--------------------------------------------------------------------------------------------------------------------|------------------------------------------------------------------------------|----------------------|-------------------------------------------------------------|---------------------------------------|
| Petitte 2015 <sup>91</sup>      | 2000-2014 (2014)             | General population (adult); 16-11,290 (NR)                  | 6; Academic Search Complete, CINAHL, ERIC, Medline, PsycARTICLES, and PsycINFO | 33 (NA)  | 13; Netherlands, USA, UK, Israel, Sweden, Turkey, Malaysia, Ireland, Canada, Finland, Greece, Colombia, and Norway | Cross-sectional, Correlational, Experimental, quasi-experimental, and Cohort | Loneliness           | Coronary heart disease and Ischemic heart disease mortality | NR                                    |
| Rodgers 2019 <sup>94</sup>      | 2007-2018 (January 2019)     | General population (13 and above years); 182-1,517,336 (NR) | 3; PubMed, Embase, and PsycInfo                                                | 145 (NA) | More than 139 countries including countries in Africa                                                              | Ecological, Cross-sectional, and prospective                                 | Social capital score | Stroke and mortality due to CVD and Coronary heart disease  | NR                                    |
| Sebastianski 2014 <sup>96</sup> | 1991-2013 (April 2013)       | General population (NR); 90-80,375 (NR)                     | 5; Medline Embase, BIOSIS Previews, PubMed, Web of Science, and Scopus         | 15 (15)  | 4; USA, Malaysia, UK, and Canada                                                                                   | Cross-sectional                                                              | Ethnicity            | Peripheral arterial disease                                 | Assessed but the tool is not reported |
| Smaardijk 2019 <sup>90</sup>    | 2000-2017 (January 17, 2018) | General population (mean age                                | 3; PubMed, Embase, and PsycINFO                                                | 62 (NA)  | 4 regions; North America, Europe,                                                                                  | Prospective cohort                                                           | social support       | Incident Ischemic heart disease                             | NR                                    |

|                             |                             |                                                                                                                |                                 |         |                                   |                                           |                                 |                                                                        |                                       |
|-----------------------------|-----------------------------|----------------------------------------------------------------------------------------------------------------|---------------------------------|---------|-----------------------------------|-------------------------------------------|---------------------------------|------------------------------------------------------------------------|---------------------------------------|
|                             |                             | 18.3-80.2 years); 76-4545 327 (0%-100%)                                                                        |                                 |         | Oceania, and Asia                 |                                           |                                 |                                                                        |                                       |
| Zaman 2013 <sup>95</sup>    | 1996-2010 (January 2012)    | General population (adult); 111 555 South Asians and 4 197 923 white subjects (73.9% in SA and 64.9% in White) | 1; Medline                      | 9 (9)   | 4; England, Wales, UK, and Canada | Cohort                                    | Ethnicity                       | Coronary artery disease                                                | NR                                    |
| Theorell 2016 <sup>87</sup> | Stated above                |                                                                                                                |                                 |         |                                   |                                           | Social support at work          | Fatal coronary heart disease, myocardial infarction, angina and stroke | Stated above                          |
| Tibirica 2022 <sup>60</sup> | 1992-2021(October 26, 2021) | General population (older adults, 57 & above) (15.6-                                                           | 3; PsycInfo, Embase, and PubMed | 17 (NA) | 1; USA                            | Cross-sectional, cohort, and case-control | Loneliness and social isolation | Heart disease and Stroke                                               | Scale to Assess Scientific Quality of |

|                                 |                             |                                                              |                                                                                                                                                                                                                                                                                                                                       |         |                                                                                                   |                                       |                                          |                                               |                                   |
|---------------------------------|-----------------------------|--------------------------------------------------------------|---------------------------------------------------------------------------------------------------------------------------------------------------------------------------------------------------------------------------------------------------------------------------------------------------------------------------------------|---------|---------------------------------------------------------------------------------------------------|---------------------------------------|------------------------------------------|-----------------------------------------------|-----------------------------------|
|                                 |                             | 49.2);122 -<br>7607                                          |                                                                                                                                                                                                                                                                                                                                       |         |                                                                                                   |                                       |                                          |                                               | Investigation<br>s (SASQI)        |
| Valtorta 2016<br><sup>25</sup>  | 1983-2014<br>(May 2015)     | General<br>population<br>(adult); 98-47<br>713 (0%-<br>100%) | 16; Medline,<br>Embase,<br>CINAHL Plus,<br>PsycINFO,<br>ASSIA, Web of<br>Science,<br>Cochrane<br>Library, Social<br>Policy, and<br>Practice, National<br>Database of<br>Ageing<br>Research, Open<br>Grey, HMIC,<br>ETHOS, NDLTD,<br>NHS<br>Evidence, SCIE<br>and National<br>Institute for<br>Health and Care<br>Excellence<br>(NICE) | 23 (23) | 7; Russia,<br>Sweden, USA,<br>Northern<br>Ireland, Japan,<br>Denmark,<br>France, and<br>Australia | Cohort                                | Loneliness<br>and/or social<br>isolation | Coronary heart<br>disease and<br>Stroke       | Assessed/to<br>ol not<br>reported |
| Lightbody<br>2017 <sup>89</sup> | 2001-2016<br>(January 2017) | General<br>population<br>(adult); 25-                        | 5; MEDLINE,<br>EMBASE,<br>CINAHL,<br>PsycINFO, and                                                                                                                                                                                                                                                                                    | 46 (46) | NR; NR                                                                                            | Cohort<br>studies and<br>case-control | Social support                           | Stroke<br>(ischemic<br>stroke,<br>hemorrhagic | NIH tool                          |

|                                                                        |                           |                                                          |                                             |         |                                                                                                                                                      |                            |                        |                                                                             |     |
|------------------------------------------------------------------------|---------------------------|----------------------------------------------------------|---------------------------------------------|---------|------------------------------------------------------------------------------------------------------------------------------------------------------|----------------------------|------------------------|-----------------------------------------------------------------------------|-----|
|                                                                        |                           | 26,949 (0-100%)                                          | the Cochrane Database of Systematic Reviews |         |                                                                                                                                                      |                            |                        | stroke, subarachnoid hemorrhage, and/or TIA)                                |     |
| Oramasionwu 2012 <sup>50</sup>                                         | 2003-2009 (May 31, 2010)  | Patients infected with HIV (adult); 885-316,963 (0%-90%) | 1; Medline                                  | 5       | 1; USA                                                                                                                                               | Cohort                     | Race                   | Unspecified CVD<br>Cardiomyopathy,<br>IHD, CAD, MI, angina, CHF, and stroke | NR  |
| <b>Neighborhood and build environment (total number of reviews=13)</b> |                           |                                                          |                                             |         |                                                                                                                                                      |                            |                        |                                                                             |     |
| Backholer 2017 <sup>81</sup>                                           | Stated above              |                                                          |                                             |         |                                                                                                                                                      |                            | Area level deprivation | Stated above                                                                |     |
| Jakubowski 2021 <sup>107</sup>                                         | 1994-2020 (March 1, 2021) | General population (adult); 830579 (0-22.9%)             | 2; PubMed and PsycINFO                      | 45 (45) | 10; United States, UK, Multi-country studies across (the Americas, Europe, and Asia), South Africa, Mexico, Ireland, Brazil, New Zealand, and Canada | Cohort and cross-sectional | Sexual violence        | CVD, CHD, IHD, MI, and stroke                                               | NOS |

|                             |                              |                                                                                                                                      |                                                                |         |                                        |                                                       |                                                                                  |                                                                                                                |                              |
|-----------------------------|------------------------------|--------------------------------------------------------------------------------------------------------------------------------------|----------------------------------------------------------------|---------|----------------------------------------|-------------------------------------------------------|----------------------------------------------------------------------------------|----------------------------------------------------------------------------------------------------------------|------------------------------|
| Jawad 2019 <sup>70</sup>    | 1992-2018<br>(February 2019) | Population exposed to author-defined Conflict (adult); 35-35835 (for those that report sample size) (NR-100%)                        | 5; Medline, Embase, PsycInfo, Global Health and Web of Science | 65 (NA) | NR; NR                                 | Cross-sectional, Ecological, Cohort, and case-control | Armed conflict                                                                   | Acute MI, Angina pectoris, chronic IHD, unspecified heart disease, and unspecified stroke, and their mortality | NOS                          |
| Kraft 2020 <sup>49</sup>    | 2004-2015<br>(June 2017)     | Low-Socioeconomic Status, Racial/ Ethnic Minority, and Rural Populations (all age groups); 132-1,477,828 (35% adult and 17.7% youth) | 4; PubMed, Medline, Web of Science, and Google Scholar         | 43 (NA) | 1; USA                                 | Cross-sectional and Cohort                            | Built environment; Grocery stores, Convenience stores, and fast food restaurants | Stroke and CHD                                                                                                 | NR                           |
| Malambo 2016 <sup>110</sup> | 2005-2015<br>(April 2015)    | General population (adult); 102-                                                                                                     | 6; Masterfile Premier, CINAHL, Global Health, Health           | 18 (NA) | 7; USA, New Zealand, Japan, Australia, | Cohort and Cross-sectional                            | Build environment (high crime rate, proximity                                    | MI, angina, Coronary heart disease, stroke,                                                                    | STROBE and PRISMA checklists |

|                                |                                  |                                                                     |                                                                                                                                                                                                     |         |                                 |                                                    |                                                                                                                                            |                      |    |
|--------------------------------|----------------------------------|---------------------------------------------------------------------|-----------------------------------------------------------------------------------------------------------------------------------------------------------------------------------------------------|---------|---------------------------------|----------------------------------------------------|--------------------------------------------------------------------------------------------------------------------------------------------|----------------------|----|
|                                |                                  | 4,319,674<br>(0%-NR)                                                | Source:<br>Nursing/Academi<br>c, Medline and<br>Science Direct                                                                                                                                      |         | Canada,<br>Sweden, and<br>China |                                                    | to a major<br>road, food,<br>stores,<br>parks/recreatio<br>n, fast food<br>restaurants,<br>bars/pubs, PA<br>and healthcare<br>facilities). | and heart<br>failure |    |
| Burnette<br>2020 <sup>54</sup> | 1983-2017 (<br>December<br>2017) | US<br>indigenous<br>people (all<br>ages)<br>; 30-127,475<br>(0%-NR) | 8; Google<br>Scholar, EBSCO,<br>PsycINFO,<br>SocINDEX with<br>Full Text, The<br>Educational<br>Resource<br>Information<br>Center<br>(ERIC),<br>Academic Search<br>Complete,<br>PubMed, and<br>JSTOR | 51 (NA) | 1; USA                          | Cross-<br>sectional<br>and<br>longitudinal         | Intimate<br>partner<br>violence                                                                                                            | CVD                  | NR |
| O'Neil 2018<br><sup>109</sup>  | 2010-2017<br>(August 2017)       | General<br>population<br>(adult); 34-<br>9976 (NR)                  | 6; CINAHL, Ovid<br>Medline,<br>PubMed,<br>Scopus,                                                                                                                                                   | 4 (NA)  | NR; NR                          | Longitudinal,<br>repeated<br>measure<br>design and | Intimate<br>partner<br>violence                                                                                                            | CVD                  | NR |

|                                           |                                   |                                                                  |                                                                                        |         |                                                              |                                            |                                 |                                                                                                  |                                                                                     |
|-------------------------------------------|-----------------------------------|------------------------------------------------------------------|----------------------------------------------------------------------------------------|---------|--------------------------------------------------------------|--------------------------------------------|---------------------------------|--------------------------------------------------------------------------------------------------|-------------------------------------------------------------------------------------|
|                                           |                                   |                                                                  | ProQuest,<br>Google Scholar                                                            |         |                                                              | cross-<br>sectional                        |                                 |                                                                                                  |                                                                                     |
| Pate 2021 <sup>108</sup>                  | 2012-2018<br>(December<br>2018)   | General<br>population<br>(NR); 23200<br>(0%)                     | 3; Scopus, Web<br>of Science, and<br>SAGE                                              | 29 (NA) | NR; NR                                                       | NR                                         | Intimate<br>partner<br>violence | Heart disease,<br>heart attack,<br>and stroke                                                    | NR                                                                                  |
| Peer 2020 <sup>59</sup>                   | 1999-2018<br>(October 1,<br>2019) | General<br>population<br>(adult);<br>85,5206 (0%)                | 3; PubMed,<br>Scopus, and<br>Web of Science                                            | 9 (NA)  | 1; USA                                                       | Cross-<br>sectional<br>and<br>longitudinal | Sexual abuse                    | Heart attack<br>and Stroke                                                                       | Assessed by<br>adapting the<br>criteria<br>developed by<br>Suglia and<br>colleagues |
| Sanchez-<br>Santos 2013<br><sup>111</sup> | 1998-2011<br>(August 31,<br>2012) | General<br>population<br>(adult); 1129-<br>409,775 (NR-<br>100%) | 1; PubMed                                                                              | 21 (21) | 6; England,<br>Scotland,<br>Wales, USA,<br>Sweden, and<br>UK | Cohort                                     | Neighborhood<br>SES             | Mortality due to<br>vascular<br>disease<br>(Majority<br>coronary heart<br>disease and<br>Stroke) | NR                                                                                  |
| Kim 2021 <sup>26</sup>                    | 2007-2018<br>(May 19, 2018)       | General<br>population<br>(adult); 4619-<br>3,644,309<br>(NR)     | 4; ProQuest<br>Dissertation &<br>Theses,<br>PsycInfo,<br>PubMed, and<br>Web of Science | 8 (NA)  | 3; US, Sweden,<br>and Japan                                  | NR                                         | Neighborhood<br>SES             | Stroke                                                                                           | Modified<br>NOS                                                                     |
| Potter 2019<br><sup>77</sup>              | Stated above                      |                                                                  |                                                                                        |         |                                                              |                                            | Neighborhood<br>SES             | Stated above                                                                                     |                                                                                     |



|                                                                 |                            |                                                      |                                                           |         |                                                                                     |                                           |                |                                                                                       |    |
|-----------------------------------------------------------------|----------------------------|------------------------------------------------------|-----------------------------------------------------------|---------|-------------------------------------------------------------------------------------|-------------------------------------------|----------------|---------------------------------------------------------------------------------------|----|
| Suglia 2015 <sup>106</sup>                                      | 1999-2013<br>(August 2013) | General population (adult); 56-70156 (0%-50%)        | 2; PubMed and Web of Science                              | 15 (NA) | 6 (USA, Canada, Netherlands, Norway, Spain, South Africa) and Multi-country         | Cross-sectional and prospective cohort    | Violence       | CVD (Myocardial infarction, stroke, angina, and congestive heart failure)             | NR |
| <b>Early childhood development (total number of reviews=14)</b> |                            |                                                      |                                                           |         |                                                                                     |                                           |                |                                                                                       |    |
| Bijker 2016 <sup>101</sup>                                      | 1989-2014<br>(NR)          | Ethnic minority populations (adult); 134-20,661 (NR) | 2; PubMed and Embase                                      | 19 (NA) | 2; USA, Australia                                                                   | Cohort and cross-sectional                | Early-life SES | Heart Failure and stroke                                                              | NR |
| Galobardes 2006 <sup>65</sup>                                   | NR<br>(September 2004)     | General population (adult); NR (NR)                  | 4; Medline, Embase, and ISI Web of Science                | 40 (NA) | 9; UK, Finland, Sweden, Norway, Germany, Denmark, US, China, and the Czech Republic | Cohort, case-control, and cross-sectional | childhood SES  | CVD, Stroke, Myocardial infarction, Angina, Coronary heart disease, and CVD mortality | NR |
| Galobardes 2004 <sup>64</sup>                                   | NR (NR)                    | General population (adult); NR (NR)                  | NR (Stated as a adequate electronic search was conducted) | 29 (NA) | 8; United Kingdom, Sweden, Finland, Norway, Denmark, the Netherlands, the United    | Cohort, case-control, cross-sectional     | childhood SES  | CVD and CVD mortality                                                                 | NR |

|                                       |                                |                                                      |                                                           |          |                                                                                                                                                                         |                            |                         |                                                                       |                                                                          |
|---------------------------------------|--------------------------------|------------------------------------------------------|-----------------------------------------------------------|----------|-------------------------------------------------------------------------------------------------------------------------------------------------------------------------|----------------------------|-------------------------|-----------------------------------------------------------------------|--------------------------------------------------------------------------|
|                                       |                                |                                                      |                                                           |          | States, and Russia                                                                                                                                                      |                            |                         |                                                                       |                                                                          |
| Hughes 2017 <sup>104</sup>            | 1998-2016 (May 6, 2016)        | General population (adult); 210-53998 (NR)           | 5; unspecified electronic databases                       | 37 (37)  | 17; USA, UK, Finland, Canada, China, New Zealand, Philippines, Saudi Arabia, Sri Lanka, Albania, Latvia, Lithuania, Macedonia, Montenegro, Romania, Russia, and Turkey. | cohort and cross-sectional | Adverse childhood event | CVD, coronary heart disease, heart attack, and ischemic heart disease | Standard principles of quality assessment                                |
| Jacquet-Smailovic 2021 <sup>105</sup> | 1998-2019 (August 31, 2019)    | General population (adult); 394 to 79,810 (40%-100%) | 5; PubMed, Medline, PsycINFO, ScienceDirect, and ProQuest | 10 (10)  | 2; USA and UK                                                                                                                                                           | Cross-sectional and Cohort | Adverse childhood event | Myocardial infarction                                                 | National Heart, Lung and Blood Institute (NHLBI) Quality Assessment Tool |
| Mallinson 2021 <sup>100</sup>         | 2005-2020 (September 19, 2020) | General population (adults); 794-                    | 3; Embase, Medline, and Global Health databases           | 29 (N A) | >19 regions ; Colombia, Jamaica, multiple Latin                                                                                                                         | Cross-sectional and Cohort | childhood SES           | Coronary heart disease                                                | NOS                                                                      |

|                            |                           |                                                            |                                  |           |                                                                                                                                                      |                                          |                                                    |                                         |                               |
|----------------------------|---------------------------|------------------------------------------------------------|----------------------------------|-----------|------------------------------------------------------------------------------------------------------------------------------------------------------|------------------------------------------|----------------------------------------------------|-----------------------------------------|-------------------------------|
|                            |                           | 20,086 (27%-60%)                                           |                                  |           | American cities, India, China, Indonesia, South Africa, Ghana, Botswana, Russia, and 1 included data from multiple world regions.                    |                                          |                                                    |                                         |                               |
| McEniry 2013 <sup>99</sup> | 2005-2011 (NR)            | General population (adult, 45 and older); 1434-26,820 (NR) | 1; PubMed                        | 20 (NA)   | 5; China and Latin America (4 countries and major cities)                                                                                            | Cohort                                   | Childhood SES                                      | Heart disease                           | Assessed (tool not specified) |
| Norman 2012 <sup>103</sup> | 1993-2012 (June 26, 2012) | General population (adult); 164-136,549 (0%-100%)          | 3; Medline, Embase, and PsycINFO | 124 (124) | >18 (majority from the US and Canada); China, US, UK, Canada, Netherlands, New Zealand, South Africa, Japan, Israel, South Korea, Thailand, Denmark, | Cross-sectional, cohort and case-control | Child Physical Abuse, Emotional Abuse, and Neglect | CVD, stroke, and ischemic heart disease | NOS                           |

|                               |                                |                                                         |                                                                                                                                                                                                                     |          |                                                                                          |                         |                                                    |                                          |     |
|-------------------------------|--------------------------------|---------------------------------------------------------|---------------------------------------------------------------------------------------------------------------------------------------------------------------------------------------------------------------------|----------|------------------------------------------------------------------------------------------|-------------------------|----------------------------------------------------|------------------------------------------|-----|
|                               |                                |                                                         |                                                                                                                                                                                                                     |          | India, Philippines, France, Australia, and Italy                                         |                         |                                                    |                                          |     |
| Petrucelli 2019 <sup>52</sup> | 1990-2016 (September 30, 2016) | General Population (all age group); 36 - 2,313,988 (NR) | 6; Medline, Medline Daily, Epub Ahead of Print, In-Process & Other Non-indexed citations; ERIC® (Educational Resource Information Collection); HAPI (Healthcare and Psychosocial Instruments); and Scopus databases | 96 (NA)  | 9; US, England, Canada, Ireland, Finland, Norway, Sweden, Australia, and the Philippines | Cohort and case-control | Adverse childhood event                            | Ischemic heart disease                   | NOS |
| Pool 2021 <sup>102</sup>      | 1992-2018 (June 2018)          | General population (NR); 126-2,298,130 (NR)             | 5; Medline, Embase, PsycINFO, CINAHL, and Web of Science                                                                                                                                                            | 210 (NA) | NR; NR                                                                                   | Longitudinal            | childhood SES and childhood psychosocial adversity | CVD, coronary heart disease, and stroke) | NR  |

|                                |                          |                                              |                                                   |         |        |                                 |                             |                         |    |
|--------------------------------|--------------------------|----------------------------------------------|---------------------------------------------------|---------|--------|---------------------------------|-----------------------------|-------------------------|----|
| Suglia 2015 <sup>106</sup>     | Stated above             |                                              |                                                   | 15 (NA) |        |                                 | childhood violence exposure | Stated above            |    |
| McHutchison 2017 <sup>78</sup> | Stated above             |                                              |                                                   |         |        |                                 | Childhood SES               | Stated above            |    |
| Wegman 2009 <sup>53</sup>      | 1988-2005 (March 2017)   | General population (adult); 48,801 (4%-100%) | 2; PubMed and PsycINFO                            | 24 (24) | NR; NR | Retrospective Cohort            | Childhood abuse             | Heart attack and stroke | NR |
| Kalmakis 2014 <sup>48</sup>    | 1998-2012 (January 2013) | General population (adult); 36-68,505 (NR)   | 4; PubMed, CINAHL, PsycINFO, and Social Abstracts | 42 (NA) | NR; NR | Correlational and case controls | Childhood abuse             | Ischemic heart disease  | NR |

#Presented format based on stroup DF, Berlin JA, Morton SC, Olkin I, Williamson GD, Rennie D, et al. Meta-analysis of observational studies in epidemiology: a proposal for reporting. *Jama*. 2000;283(15):2008-12.

**Abbreviations:** CVD, composite Cardiovascular Disease; HICs, High-income Countries; JBI, Joanna Briggs Institute; LICs, Low-Income Countries; MICs, Middle-income Countries; NA, Not Appropriate; NOS, Newcastle-Ottawa Scale; NR, Not Reported; SES, Socioeconomic Status; STROBE, Strengthening the Reporting of Observational Studies in Epidemiology; UK, United Kingdom; and USA, United States of America.

**Table S5. Summary of the included variables under social determinants of health: Evidence from the included reviews**

| Construct                        | Measurement and/or description                                                                                                                                                                                                                                                                                                            |
|----------------------------------|-------------------------------------------------------------------------------------------------------------------------------------------------------------------------------------------------------------------------------------------------------------------------------------------------------------------------------------------|
| Socioeconomic status (composite) | A composite variable using education-based measures such as literacy or years of schooling, aggregate measures (combination of education, income, housing, social castes or standardized scales), and income-based measures. <sup>24, 61</sup> Besides the above-mentioned measures, one study includes area-level socioeconomic measures |

|            |                                                                                                                                                                                                                                                                                                                                                                                                                                                                                                                                                                                                                                                                                                          |
|------------|----------------------------------------------------------------------------------------------------------------------------------------------------------------------------------------------------------------------------------------------------------------------------------------------------------------------------------------------------------------------------------------------------------------------------------------------------------------------------------------------------------------------------------------------------------------------------------------------------------------------------------------------------------------------------------------------------------|
|            | <p>(Carstairs and Index of Multiple Deprivation).<sup>71</sup> A study by Salgado-Barreira et al.<sup>43</sup> also reports different measures for socioeconomic status.</p> <p>Subjective social status: according to the author of the systematic review,<sup>72</sup> the included primary studies used a 10-rung ladder, a nine-rung ladder, the societal ladder, and the community ladder to measure subjective social status. People with a higher subjective social status were those who have the most money, the most education, and the most respected jobs. Those under lower subjective social status have the least money, the least education, and the least respected jobs or no job.</p> |
| Education  | <p>The majority of the reviews used years of schooling to measure education and the cut point to say high and low levels of education was different (the cut point could be below and above college, high school, grade eight, etc).<sup>62, 80, 81, 83</sup></p> <p>In one study, it was categorised into three groups; low (years <math>\leq 9</math>), medium (10–12), and high (&gt;12 years of education).<sup>80</sup> However, for this umbrella review, we used the low vs high category to be consistent with other included reviews.</p>                                                                                                                                                       |
| Occupation | <p>In the majority of the studies, occupation was measured as manual vs non-manual. Others used employed vs unemployed, white collar vs blue-collar, manufacturing laborer vs officials, and others.<sup>61, 76, 77, 83</sup> Occupation was measured differently between reviews and between primary studies in the included reviews. Manual labourers, unemployed people, and/or blue-collar workers were mainly considered as a low occupational group (low-skilled workers).<sup>61, 62, 82, 84</sup></p>                                                                                                                                                                                            |
| Income     | <p>Most reviews referred to income as high and low without mentioning the cut point utilised to determine high and low.<sup>61</sup> One review used salary income with cut points; low (20,000), medium (20,001 to 40,000), and high for income (&gt;40,000 USA dollar) per year.<sup>80</sup> This study does analyses separately for the three cut points. However, to make in line with the included reviews, we used the cut point that compared high- and low-income levels.</p>                                                                                                                                                                                                                   |

|                                                             |                                                                                                                                                                                                                                                                                                                                                                                                                                                                                                                                                                                                                                                                                                                                                                                                                    |
|-------------------------------------------------------------|--------------------------------------------------------------------------------------------------------------------------------------------------------------------------------------------------------------------------------------------------------------------------------------------------------------------------------------------------------------------------------------------------------------------------------------------------------------------------------------------------------------------------------------------------------------------------------------------------------------------------------------------------------------------------------------------------------------------------------------------------------------------------------------------------------------------|
| Homelessness/Housing instability and Food insecurity        | One review reported housing instability and food insecurity. This review reported different databases and questionnaires used to measure housing instability and food insecurity, <sup>57</sup> too many databases and questionnaires to state here. The other review did say nothing about how homelessness was measured. <sup>88</sup>                                                                                                                                                                                                                                                                                                                                                                                                                                                                           |
| Job insecurity                                              | Like other social determinants of health variables, the assessment of job insecurity across systematic reviews and within systematic reviews was different. In majorly it was measured: (1) using a global single-item question or a multidimensional dichotomised scale question; (2) using a subscale of the job content questionnaire (job insecurity scale section); (3) Other questionnaires. <sup>85, 86</sup>                                                                                                                                                                                                                                                                                                                                                                                               |
| Loneliness, social isolation, and/or Lack of social support | Measured using: (1) unvalidated 26- item interview (tertiles); (2) Short version of ISSI (quartiles); (3) using a single question(feelings of loneliness in the past 12 months or do you ever feel lonely); (4) using the revised UCLA Loneliness Scale; (5) using social support questionnaire (SSQ6); (6) Berkman–Syme SNI; (7) Duke Social Support Scale; (8) the SSI, and (9) using De Jong Gierveld loneliness scale. <sup>25, 60, 67, 68</sup><br><br>In one review, social isolation was divided into structural (participants answered whether they lived alone or not) and functional (feeling of being socially isolated). <sup>67</sup>                                                                                                                                                                 |
| Social capital and social role                              | Social capital was measured using indicators; (1) social cohesion: trust, civic/social participation, reciprocity, satisfaction with the environment, voting, helpfulness, collective efficacy, volunteering, crime, and control and (2) Social networks such as social support. <sup>58, 94</sup><br><br>The social role was measured using either: (1) an unvalidated 26- item interview (tertiles); (2) a short version of ISSI (quartiles); (3) Berkman-Syme SNI (4 levels); (4) an unvalidated measure of all contacts and close contacts; (4) Berkman-Syme SNI (2 categories); (5) Lubben Social Network Scale (tertiles); (6) Lubben Social Network Scale (4 levels); (7) Berkman-Syme SNI (4 levels for all roles; 3 levels for close roles); and (8) Unvalidated 8-item index (continuous). <sup>92</sup> |
| Discrimination                                              | History of discrimination determined via questionnaire/interview, and laboratory stigma exposure. <sup>56</sup>                                                                                                                                                                                                                                                                                                                                                                                                                                                                                                                                                                                                                                                                                                    |

|                                              |                                                                                                                                                                                                                                                                                                                                                                                                                                                                                                                                                                                                                                                                                                                                                                                                                                                                                               |
|----------------------------------------------|-----------------------------------------------------------------------------------------------------------------------------------------------------------------------------------------------------------------------------------------------------------------------------------------------------------------------------------------------------------------------------------------------------------------------------------------------------------------------------------------------------------------------------------------------------------------------------------------------------------------------------------------------------------------------------------------------------------------------------------------------------------------------------------------------------------------------------------------------------------------------------------------------|
| Ethnicity                                    | It was mostly based on self-reported, extracted from primary care records, surname analysis, and observation by the administrative staff. <sup>69, 97</sup>                                                                                                                                                                                                                                                                                                                                                                                                                                                                                                                                                                                                                                                                                                                                   |
| Childhood socioeconomic circumstances/status | <p>Childhood socioeconomic status was based on a variety of measures including parental education, parental occupation, home ownership of parents, socioeconomic status of the neighbourhood that a child was exposed to, number of rooms in the childhood home and access to household assets, and family structure characteristics.<sup>64, 65, 101</sup></p> <p>It was measured during childhood or through recall during adulthood.</p>                                                                                                                                                                                                                                                                                                                                                                                                                                                   |
| Adverse childhood events                     | <p>Adverse childhood events (ACEs) are includes childhood abuse (it may be sexual, emotional, psychological, or verbal abuse), exposure to domestic violence, parental separation or divorce, household criminality, neglect, family financial problems, family conflict or discord, bullying, death of a parent or close relative or friend, and separation from family (for instance; out-of-home care).<sup>52, 104, 105</sup></p> <p>Measured using different tools such as adverse childhood experiences questionnaire by Felitti et al. (1998), adverse childhood experiences developed by Kaiser Permanent and the Centres for Disease, the Childhood Trauma questionnaire, and the Early Trauma Inventory – Self Report, self-report, conflict tactics scale, gathered adverse childhood events data from official child services and court records, and others.<sup>48, 52</sup></p> |
| Violence                                     | <p>It can be sexual abuse or assault, sexual harassment, sexual intimate partner violence or dating violence, or military sexual trauma.</p> <p>Measurement tools: the sexual experiences survey and the sexual coercion section of the RCTS, a subset of questions from the revised Conflict Tactics Scales, using criminal records, questions from the Behavioral Risk Factor Surveillance System (BRFSS), and a single question “Has your spouse/significant other ever forced you to have sexual activities?”), military sexual trauma (MST) screening questionnaire, using unvalidated single question (‘Did you ever have an experience where someone used force or the threat of force to have sexual relations with you against your will while you were in the military?’).<sup>59, 106, 108</sup></p>                                                                               |



|                                                                 |                                                                                                                                                                                                                                                                                                                                                                                                                                                                                                                                                                                                                                                                                                                                                                                                                                         |
|-----------------------------------------------------------------|-----------------------------------------------------------------------------------------------------------------------------------------------------------------------------------------------------------------------------------------------------------------------------------------------------------------------------------------------------------------------------------------------------------------------------------------------------------------------------------------------------------------------------------------------------------------------------------------------------------------------------------------------------------------------------------------------------------------------------------------------------------------------------------------------------------------------------------------|
|                                                                 | Violence can be happened during childhood; considered in the early childhood development domain or during adulthood; considered in the neighborhood and built environment domain.                                                                                                                                                                                                                                                                                                                                                                                                                                                                                                                                                                                                                                                       |
| Conflict                                                        | Include the Croatian War of Independence (1991–1995), Bosnian War (1992–1995), Colombian conflict (1975–2015), Siege of Leningrad (1941–1944), Lebanese Civil War (1975–1991), Georgian-Ossetian Conflict (1989–present), US-led invasion of Iraq (2003–2011), Sudan Civil War (1983–2015), Unspecific conflicts in Uganda, and Other conflicts. <sup>70</sup>                                                                                                                                                                                                                                                                                                                                                                                                                                                                          |
| Neighborhood socioeconomic deprivation (area level deprivation) | Measured using different tools such as Carstairs and Morris index, Area-level socioeconomic status composite score, Neighbourhood socioeconomic status composite index, census tracts and block groups, small area market statistics, Chocho-Aza units, and postal or zip codes. <sup>26, 77, 81, 111</sup>                                                                                                                                                                                                                                                                                                                                                                                                                                                                                                                             |
| Variables related to built environment                          | <p>Geographic information system (GIS) and subjective assessment using Neighborhood Environment Walkability Scale (NEWS) were used to assess the build environment.<sup>110</sup></p> <p>The common environmental attributes identified were proximity to a major road, access to food stores, recreational areas, access to fast-food restaurants, distance from healthcare facility, and traffic density.</p> <p>Besides, one review was on food environments measured based on relation to participants' residential location, youths' school location or both; objectively or based on participants' perceptions of their food environment.</p> <p>Access is in terms of count or distance relative to participants' residence or school, while availability refers to the in-store availability of food products.<sup>49</sup></p> |

**Abbreviations:** ISSI, Interview Schedule for Social Interaction; SNI = Social Network Index; RCTS, Revised Conflict Tactics Scale; UCLA, University of California Los Angeles

**Table S6. Quality assessment results of the included systematic reviews and meta-analyses.**

| QUALITY ASSESSMENT |      | AMSTAR 2 tool (The 16 items) |            |         |            |         |         |            |            |            |         |            |            |         |          |            |         | Overall Quality |
|--------------------|------|------------------------------|------------|---------|------------|---------|---------|------------|------------|------------|---------|------------|------------|---------|----------|------------|---------|-----------------|
|                    |      | 1                            | 2          | 3       | 4          | 5       | 6       | 7          | 8          | 9          | 10      | 11         | 12         | 13      | 14       | 15         | 16      |                 |
| Author             | Year | Y/<br>N                      | Y/PY<br>/N | Y/<br>N | Y/PY<br>/N | Y/<br>N | Y/<br>N | Y/PY<br>/N | Y/PY<br>/N | Y/PY<br>/N | Y/<br>N | Y/N/N<br>M | Y/N/N<br>M | Y/<br>N | Y/<br>N/ | Y/N/N<br>M | Y/<br>N | CL/L/<br>M/H    |
| Agisilaou          | 2020 | Y                            | N          | N       | PY         | N       | N       | N          | PY         | Y          | N       | NM         | NM         | N       | N        | NM         | N       | CL              |
| Allan              | 2017 | Y                            | N          | N       | N          | Y       | N       | N          | Y          | N          | N       | NM         | NM         | N       | N        | NM         | Y       | CL              |
| Al-Shakarchi       | 2020 | Y                            | N          | N       | N          | Y       | N       | N          | Y          | Y          | N       | Y          | N          | N       | Y        | N          | Y       | CL              |
| Backholer          | 2017 | Y                            | N          | N       | N          | N       | N       | N          | Y          | Y          | N       | Y          | N          | N       | Y        | Y          | Y       | CL              |
| Barth              | 2010 | Y                            | N          | Y       | PY         | Y       | Y       | N          | PY         | N          | N       | Y          | N          | N       | Y        | Y          | Y       | CL              |
| Bijker             | 2016 | Y                            | N          | N       | Y          | N       | N       | N          | Y          | N          | N       | NM         | NM         | N       | N        | NM         | Y       | CL              |
| Birhanu            | 2022 | Y                            | Y          | Y       | PY         | Y       | Y       | N          | Y          | Y          | N       | Y          | Y          | Y       | Y        | Y          | Y       | L               |
| Chin               | 2020 | Y                            | N          | N       | PY         | Y       | N       | N          | Y          | N          | N       | NM         | NM         | N       | Y        | NM         | Y       | CL              |
| Choi               | 2014 | Y                            | N          | N       | PY         | Y       | N       | N          | Y          | N          | N       | NM         | NM         | N       | Y        | NM         | Y       | CL              |
| Cortes-Bergoderi   | 2013 | Y                            | N          | N       | Y          | Y       | N       | N          | Y          | Y          | N       | Y          | N          | N       | Y        | N          | Y       | CL              |
| Eller              | 2009 | Y                            | N          | N       | N          | N       | N       | N          | Y          | Y          | N       | NM         | NM         | N       | N        | NM         | y       | CL              |
| Ezzatvar           | 2021 | Y                            | Y          | N       | Y          | Y       | Y       | Y          | Y          | Y          | N       | Y          | Y          | Y       | Y        | Y          | Y       | H               |
| Francis            | 2015 | Y                            | N          | Y       | Y          | Y       | N       | N          | Y          | N          | N       | NM         | NM         | N       | N        | NM         | Y       | CL              |
| Freak-Poli         | 2022 | Y                            | Y          | Y       | Y          | N       | N       | Y          | Y          | Y          | N       | Y          | Y          | Y       | Y        | Y          | Y       | M               |
| Galobardes         | 2004 | Y                            | N          | N       | N          | N       | N       | N          | Y          | N          | N       | NM         | NM         | N       | Y        | NM         | Y       | CL              |
| Galobardes         | 2006 | Y                            | N          | Y       | PY         | N       | N       | N          | Y          | N          | N       | NM         | NM         | N       | Y        | NM         | N       | CL              |
| Gonzalez           | 1998 | Y                            | N          | N       | N          | N       | Y       | N          | Y          | N          | N       | NM         | NM         | N       | N        | N          | N       | CL              |
| Hawkins            | 2012 | Y                            | N          | Y       | Y          | N       | N       | N          | Y          | N          | N       | NM         | NM         | N       | N        | NM         | Y       | CL              |
| Ho                 | 2021 | Y                            | Y          | N       | Y          | N       | N       | N          | Y          | Y          | N       | Y          | N          | N       | Y        | Y          | Y       | CL              |
| Hughes             | 2017 | Y                            | N          | N       | N          | N       | N       | N          | Y          | Y          | N       | Y          | N          | N       | Y        | Y          | Y       | CL              |

|                   |      |   |    |   |    |   |   |   |    |   |   |    |    |   |   |    |   |    |
|-------------------|------|---|----|---|----|---|---|---|----|---|---|----|----|---|---|----|---|----|
| Jacquet-Smailovic | 2021 | Y | Y  | N | Y  | Y | N | N | Y  | Y | N | Y  | Y  | Y | Y | Y  | Y | L  |
| Jakubowski        | 2021 | Y | Y  | N | Y  | Y | Y | N | Y  | Y | N | Y  | N  | Y | Y | Y  | Y | L  |
| Jawad             | 2019 | Y | Y  | Y | Y  | Y | N | N | Y  | Y | Y | Y  | Y  | Y | Y | Y  | Y | L  |
| Jin               | 2015 | Y | N  | Y | Y  | Y | N | N | Y  | Y | N | Y  | Y  | N | Y | Y  | Y | CL |
| Kalmakis          | 2014 | Y | N  | N | PY | N | Y | N | Y  | N | N | NM | NM | N | N | NM | Y | CL |
| Kerr              | 2011 | Y | N  | N | PY | Y | N | N | PY | N | N | Y  | N  | N | Y | N  | N | CL |
| Khaing            | 2017 | Y | Y  | N | Y  | N | Y | N | Y  | Y | N | Y  | N  | N | Y | Y  | N | CL |
| Kim               | 2021 | Y | N  | N | Y  | Y | Y | N | Y  | Y | N | NM | NM | Y | Y | NM | Y | CL |
| Kraft             | 2020 | Y | N  | N | PY | N | N | N | Y  | N | N | NM | NM | N | Y | NM | N | CL |
| Kuper             | 2002 | Y | N  | Y | Y  | N | N | N | Y  | N | N | NM | NM | N | Y | NM | N | CL |
| Lee               | 2021 | Y | N  | N | PY | Y | N | N | Y  | Y | N | NM | NM | N | Y | NM | Y | CL |
| Lightbody         | 2017 | Y | PY | N | Y  | Y | N | N | Y  | Y | N | Y  | N  | Y | Y | Y  | N | L  |
| Lunde             | 2018 | Y | N  | N | Y  | N | N | N | Y  | Y | N | NM | NM | N | Y | NM | Y | CL |
| Malambo           | 2016 | Y | N  | N | Y  | N | Y | Y | Y  | Y | N | NM | NM | N | Y | NM | Y | CL |
| Mallinson         | 2021 | Y | Y  | N | Y  | N | N | N | Y  | Y | N | NM | NM | Y | Y | NM | Y | L  |
| Manfique-Garcia   | 2011 | Y | N  | N | Y  | N | N | N | Y  | N | N | Y  | N  | N | Y | Y  | Y | CL |
| McEniry           | 2013 | Y | N  | N | N  | N | N | N | Y  | N | N | NM | NM | N | N | NM | Y | CL |
| McHutchison       | 2017 | Y | Y  | N | Y  | N | N | N | Y  | Y | N | Y  | N  | Y | Y | Y  | Y | L  |
| Burnette          | 2020 | Y | N  | N | Y  | N | N | N | Y  | N | N | NM | NM | N | N | NM | Y | CL |
| MorettiAnfossi    | 2022 | Y | Y  | Y | Y  | N | Y | N | Y  | Y | N | NM | NM | Y | Y | NM | Y | L  |
| Norman            | 2012 | Y | PY | N | Y  | Y | N | N | Y  | Y | N | Y  | Y  | Y | Y | Y  | Y | L  |
| O'Neil            | 2018 | Y | N  | N | Y  | Y | N | N | Y  | N | N | NM | NM | N | N | NM | Y | CL |
| Oramasionwu       | 2012 | Y | N  | N | N  | N | N | N | Y  | N | N | NM | NM | N | N | NM | Y | CL |
| Panza             | 2019 | Y | N  | N | PY | N | Y | N | Y  | Y | N | NM | NM | Y | Y | NM | Y | CL |
| Parekh            | 2022 | Y | Y  | N | N  | N | N | N | Y  | Y | N | NM | NM | Y | Y | NM | Y | CL |
| Park              | 2021 | Y | N  | N | PY | Y | Y | N | Y  | Y | N | Y  | Y  | Y | Y | N  | Y | CL |
| Park              | 2022 | Y | N  | N | Y  | N | Y | N | Y  | N | N | Y  | N  | N | N | Y  | Y | CL |

|                  |      |   |    |   |    |   |   |   |    |   |   |    |    |   |   |    |   |    |
|------------------|------|---|----|---|----|---|---|---|----|---|---|----|----|---|---|----|---|----|
| Pate             | 2021 | Y | N  | N | PY | N | N | N | Y  | N | N | NM | NM | N | N | NM | Y | CL |
| Peer             | 2020 | Y | N  | Y | PY | Y | N | N | Y  | Y | N | NM | NM | N | Y | NM | Y | CL |
| Petitte          | 2015 | Y | N  | N | PY | N | N | N | Y  | N | N | NM | NM | N | N | NM | Y | CL |
| Petrucelli       | 2019 | Y | PY | N | Y  | Y | Y | N | Y  | Y | N | Y  | N  | Y | Y | N  | Y | CL |
| Pool             | 2021 | Y | N  | N | N  | N | N | N | Y  | N | N | NM | NM | N | Y | NM | Y | CL |
| Potter           | 2019 | Y | N  | N | Y  | N | Y | N | Y  | Y | N | Y  | Y  | Y | Y | N  | Y | CL |
| Rodgers          | 2019 | Y | PY | N | Y  | Y | N | N | Y  | N | N | NM | NM | N | N | NM | Y | CL |
| Zaman            | 2013 | Y | PY | N | Y  | Y | Y | N | Y  | N | N | Y  | N  | N | Y | N  | Y | CL |
| Saif-Ur-Rahman   | 2021 | Y | Y  | N | Y  | Y | Y | N | Y  | Y | N | NM | NM | Y | Y | NM | Y | L  |
| Salgado-Barreira | 2014 | Y | N  | N | Y  | Y | N | N | PY | N | N | NM | NM | N | Y | NM | N | CL |
| Sanchez-Santos   | 2013 | Y | N  | N | N  | N | N | N | Y  | N | N | Y  | N  | N | N | N  | Y | CL |
| Sebastianski     | 2014 | Y | N  | N | Y  | N | Y | N | Y  | Y | N | Y  | N  | N | Y | N  | Y | CL |
| Smaardijk        | 2019 | Y | Y  | N | Y  | Y | N | N | Y  | N | N | Y  | N  | N | Y | Y  | Y | CL |
| Suglia           | 2015 | Y | N  | N | Y  | N | N | N | Y  | Y | N | NM | NM | N | Y | NM | Y | CL |
| Tang             | 2016 | Y | PY | N | Y  | Y | N | N | Y  | Y | N | Y  | Y  | Y | Y | Y  | Y | L  |
| Theorell         | 2016 | Y | N  | N | Y  | N | N | N | Y  | Y | N | NM | NM | Y | Y | NM | Y | CL |
| Tibirica         | 2022 | Y | N  | N | PY | N | N | N | Y  | Y | N | NM | NM | Y | Y | NM | Y | L  |
| Valtorta         | 2016 | Y | Y  | N | Y  | N | N | N | Y  | Y | N | Y  | Y  | Y | Y | Y  | Y | L  |
| Vathesatogkit    | 2014 | Y | N  | N | Y  | N | N | N | Y  | N | N | Y  | Y  | N | Y | Y  | Y | CL |
| Virtanen         | 2013 | Y | N  | N | Y  | Y | N | Y | Y  | N | N | Y  | N  | N | Y | N  | Y | CL |
| Wang             | 2020 | Y | N  | N | PY | Y | N | N | Y  | Y | N | Y  | N  | N | Y | Y  | Y | CL |
| Wegman           | 2009 | Y | N  | N | Y  | N | N | N | Y  | N | N | Y  | N  | N | Y | Y  | Y | CL |
| Williams         | 2018 | Y | Y  | N | Y  | Y | N | N | Y  | Y | N | NM | NM | Y | Y | NM | Y | L  |

In the top row Dark orange highlights indicate critical and light green indicate non-critical domains.

**Abbreviations:** CL, critically low; H, high; L, low; M, Medium; N, No; NM, No Meta-analysis; PY, Partial Yes; Y, Yes.

**Figure S1. Heatmap of findings from systematic reviews without meta-analysis assessing the association between social determinants of health and cardiovascular disease outcomes (n=40).**

| Social; determinants of health characteristics | Cardiovascular disease outcome |                                  |                     |                               |                    |                             |                            |                                         |        |                     |                      |
|------------------------------------------------|--------------------------------|----------------------------------|---------------------|-------------------------------|--------------------|-----------------------------|----------------------------|-----------------------------------------|--------|---------------------|----------------------|
|                                                | Cardiovascular disease         | Cardiovascular disease mortality | Stroke              | Coronary artery/heart disease | Heart Failure      | Heart disease               | Myocardial infarction      | Ischemic Heart disease                  | Angina | Atrial fibrillation | Cardiomyopathy       |
| <b>Economic stability theme</b>                |                                |                                  |                     |                               |                    |                             |                            |                                         |        |                     |                      |
| Composite SES                                  | Lee 2021 (n=4)                 | Williams 2018 (n=2)              | Williams 2018 (n=1) | Williams 2018 (n=1)           | Hawkins 2012 (n=8) | Salgado-Barreira 2014 (n=8) | Williams 2018 (Acute, n=1) |                                         |        | Allan 2017 (n=6)    | Agisilaou 2020 (n=2) |
| Education                                      | Birhanu 2022 (n=4)             |                                  |                     |                               |                    |                             |                            | Gonzalez 1998 (n=14) and Lee 2021 (n=1) |        | Lunde 2020 (n=9)    |                      |
| Income                                         |                                | Lee 2021 (n=2)                   |                     |                               |                    |                             | Lee 2021 (n=1)             |                                         |        | Lunde 2020 (n=5)    | Agisilaou 2020 (n=3) |

|                                           |                                            |                                              |                                            |                           |                        |                   |                   |                                                  |                |                  |                              |
|-------------------------------------------|--------------------------------------------|----------------------------------------------|--------------------------------------------|---------------------------|------------------------|-------------------|-------------------|--------------------------------------------------|----------------|------------------|------------------------------|
| Occupation                                | Lee 2021 (n=3) & Saif-Ur-Rahman 2021 (n=1) | Lee 2021 (n=3) and Saif-Ur-Rahman 2021 (n=1) | Lee 2021 (n=3) & Saif-Ur-Rahman 2021 (n=1) |                           |                        |                   | Lee 2021 (n=3)    | Gonzalez 1998 (n=23) & Saif-Ur-Rahman 2021 (n=1) | Lee 2021 (n=3) | Lunde 2018 (n=3) |                              |
|                                           | Birhanu 2022 (n=2)                         |                                              |                                            |                           |                        |                   |                   |                                                  |                |                  |                              |
| Job insecurity                            |                                            |                                              |                                            | Theorell 2016 (CHD, n=15) |                        |                   |                   | MorettiAnfossi 2022 (n=7)                        |                |                  |                              |
|                                           |                                            |                                              |                                            |                           |                        |                   |                   | Eller 2019 (n=5)                                 |                |                  |                              |
| Homelessness                              | Parekh 2022 (1)                            | Parekh 2022 (n=2)                            | Parekh 2022 (n=3)                          |                           |                        | Parekh 2022 (n=1) |                   | Parekh 2022 (mortality, n=1)                     |                |                  | Parekh 2022 (mortality, n=1) |
| Food insecurity                           | Parekh 2022 (n=5)                          | Parekh 2022 (n=2)                            |                                            | Parekh 2022 (CHD, n=2)    | Parekh 2022 (CHF, n=2) |                   | Parekh 2022 (n=1) |                                                  |                |                  |                              |
| <b>Social and community context theme</b> |                                            |                                              |                                            |                           |                        |                   |                   |                                                  |                |                  |                              |

|                                     |                   |                                        |                                            |                               |  |                     |                                      |                                           |                  |  |  |
|-------------------------------------|-------------------|----------------------------------------|--------------------------------------------|-------------------------------|--|---------------------|--------------------------------------|-------------------------------------------|------------------|--|--|
| Lack of/poor social support         |                   |                                        |                                            | Kuper 2002 (n=12)             |  |                     | Barth 2010 (n=5)                     | Eller 2019 (n=7) and Theorell 2016 (n=11) |                  |  |  |
| Loneliness and social isolation     |                   |                                        | Petitte 2015 (n=1) and Tibirica 2022 (n=1) | Petitte 2015 (n=1)            |  | Tibirica 2022 (n=1) |                                      | Petitte 2015 (mortality, n=1)             |                  |  |  |
| Social capital index                |                   | Choi 2014 (n=6) and Rodgers 2019 (n=6) | Rodgers 2019 (n=1)                         | Rodgers 2019 (mortality, n=1) |  |                     | Rodgers 2019 (acute, mortality, n=1) |                                           |                  |  |  |
| Social capital (Fewer social roles) | Chin 2020 (n= 12) | Chin 2020 (n= 7)                       |                                            |                               |  |                     |                                      |                                           |                  |  |  |
| Discrimination                      | Panza 2019 (n=1)  | Panza 2019 (n=1)                       | Panza 2019 (n=1)                           |                               |  |                     | Panza 2019 (n=1)                     |                                           | Panza 2019 (n=1) |  |  |

| Ethnicity (Black vs White)                                                              | Oramasionwu 2012 (n=2) |  | Oramasionwu 2012 (n=1) | Oramasionwu 2012 (n=1) |  | Oramasionwu 2012 (n=1) | Oramasionwu 2012 (n=2) | Oramasionwu 2012 (n=2)        |  |                  |                      |
|-----------------------------------------------------------------------------------------|------------------------|--|------------------------|------------------------|--|------------------------|------------------------|-------------------------------|--|------------------|----------------------|
| Ethnicity (African-American, Asian, Chinese, Hispanic, and Non-Hispanic Black vs White) |                        |  |                        |                        |  |                        |                        |                               |  | Allan 2017 (n=5) |                      |
| Ethnicity (Afro-Caribbean vs Caucasian)                                                 |                        |  |                        |                        |  |                        |                        | Francis 2015 (mortality, n=1) |  |                  |                      |
| Ethnicity (African-American and Hispanic and white women)                               |                        |  |                        |                        |  |                        |                        |                               |  |                  | Agisilaou 2020 (n=5) |
| Early childhood development theme                                                       |                        |  |                        |                        |  |                        |                        |                               |  |                  |                      |



|                                           |                                                             |                       |                                                                          |                                                                               |                        |                    |                                      |                                                                   |                  |  |  |
|-------------------------------------------|-------------------------------------------------------------|-----------------------|--------------------------------------------------------------------------|-------------------------------------------------------------------------------|------------------------|--------------------|--------------------------------------|-------------------------------------------------------------------|------------------|--|--|
| Childhood socioeconomic status            | Galobarde 2006 (n=40) and Pool 2021 (n=7)                   | Galobardes 2004 (n=9) | Bijker 2016 (n=1) and Pool 2021 (n=2)<br>Galobardes 2004 (mortality n=6) | Galobardes 2004 (mortality, n=10) and Pool 2021 (n=2)<br>Mallinson 2021 (n=3) | Bijker 2016 (n=1)      | McEniry 2013 (n=3) |                                      |                                                                   |                  |  |  |
| Adverse childhood events*                 | Pool 2021 (n=5) and Suglia 2015 (n=8)                       |                       | Pool 2021 (n=3)                                                          | Pool 2021 (n=1)                                                               | Pool 2021 (n=1)        |                    |                                      | Suglia 2015 (n=8) and Kalmakis 2014 (n=1)                         |                  |  |  |
| <b>Neighborhood and built environment</b> |                                                             |                       |                                                                          |                                                                               |                        |                    |                                      |                                                                   |                  |  |  |
| Violence                                  | Burnette 2020 (n=1), O'Neil 2018 (n=1), and Pate 2021 (n=1) |                       | Suglia 2015 (n=3)<br>Peer 2020 (n=1)                                     | Suglia 2015 (n=4)                                                             | Suglia 2015 (CHF, n=2) |                    | Suglia 2015 (n=3)<br>Peer 2020 (n=1) |                                                                   |                  |  |  |
| Conflict                                  |                                                             |                       | Jawad 2019 (n=5)                                                         |                                                                               |                        | Jawad 2019 (n=5)   | Jawad 2019 (acute, n=7)              | Jawad 2019 (chronic, n=4)<br>Jawad 2019 (mortality, chronic, n=3) | Jawad 2019 (n=5) |  |  |

|                                         |  |  |                                         |                                        |                         |                             |                    |  |                    |                |
|-----------------------------------------|--|--|-----------------------------------------|----------------------------------------|-------------------------|-----------------------------|--------------------|--|--------------------|----------------|
|                                         |  |  | Jawad 2019 (mortality, n=4)             |                                        |                         | Jawad 2019 (mortality, n=5) |                    |  |                    |                |
| Environmental attributes#               |  |  | Malambo 2016 (n=2) and Kraft 2020 (n=1) | Malambo 2016 (n=2)<br>Kraft 2020 (n=1) | Malambo 2016 (CHF, n=1) |                             | Malambo 2016 (n=1) |  | Malambo 2016 (n=1) |                |
| Neighborhood socioeconomic disadvantage |  |  |                                         |                                        |                         |                             |                    |  |                    | Kim 2021 (n=8) |

#Includes inaccessibility of healthcare facilities, environmental noise, proximity to a major road/ high traffic density, high crime rate, reduced access to food stores, parks/recreation, and increased access to fast food restaurants.

\*Childhood adverse events such as lower childhood cumulative adverse events and adverse events specific to abuse, neglect, and violence.

Available systematic reviews are presented as first author, year of publication, and the number of studies (represented by n) contributing to the finding.

Red highlighting indicates that worse/poor SDoH factor is associated with a higher CVD risk. Orange highlighting indicates an inconsistent relationship. Yellow highlighting indicates a null relationship and those without highlighting indicate there were no reviews (without meta-analysis) that assessed the exposure and the specified CVD and CVD subtype. No reviews (without meta-analysis) reported a protective effect of poor SDoH on CVD.

**Abbreviations:** CHD, Coronary Heart Disease; CHF, Congestive Heart Failure

**Figure S2. Forest plot of outcomes from systematic reviews with meta-analytic analyses assessing the association between education (lower vs higher level of education; reference: lower level of education) and CVD.**

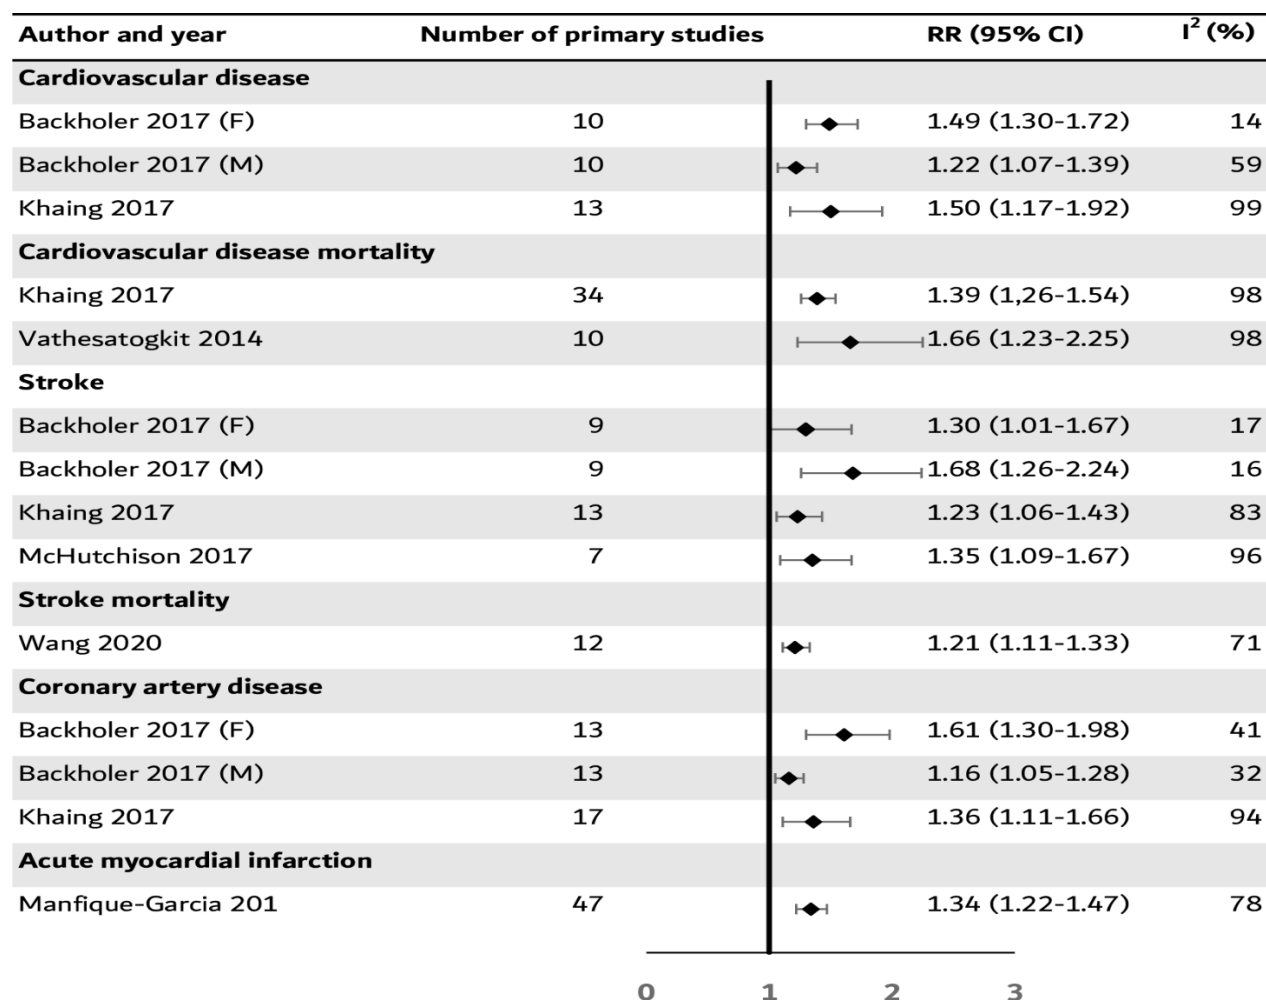

**Abbreviations:** CI, confidence interval; F, Female; I<sup>2</sup>, Heterogeneity; M, Male; RR, Relative Risk.

**Figure S3. Forest plot of outcomes from systematic reviews with meta-analytic analyses assessing the association between occupation (lower vs higher occupation level; reference: lower occupational level) and CVD.**

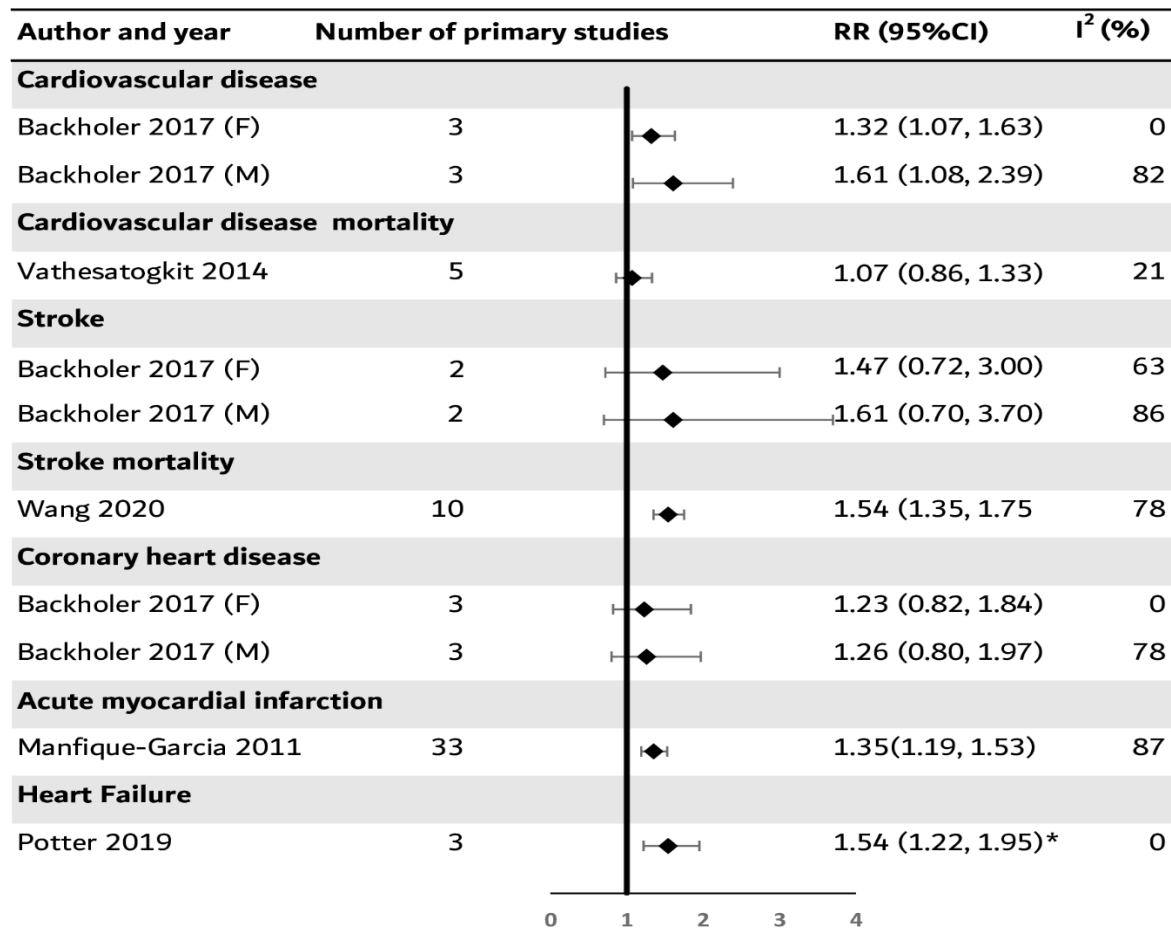

\* Hazard ratio

**Abbreviations:** CI, confidence interval; F, Female; I<sup>2</sup>, Heterogeneity; M, Male; RR, Relative Risk.

**Figure S4. Forest plot of outcomes from systematic reviews with meta-analytic analyses assessing the association between income (lower vs higher level of income; reference: lower level of income) and CVD.**

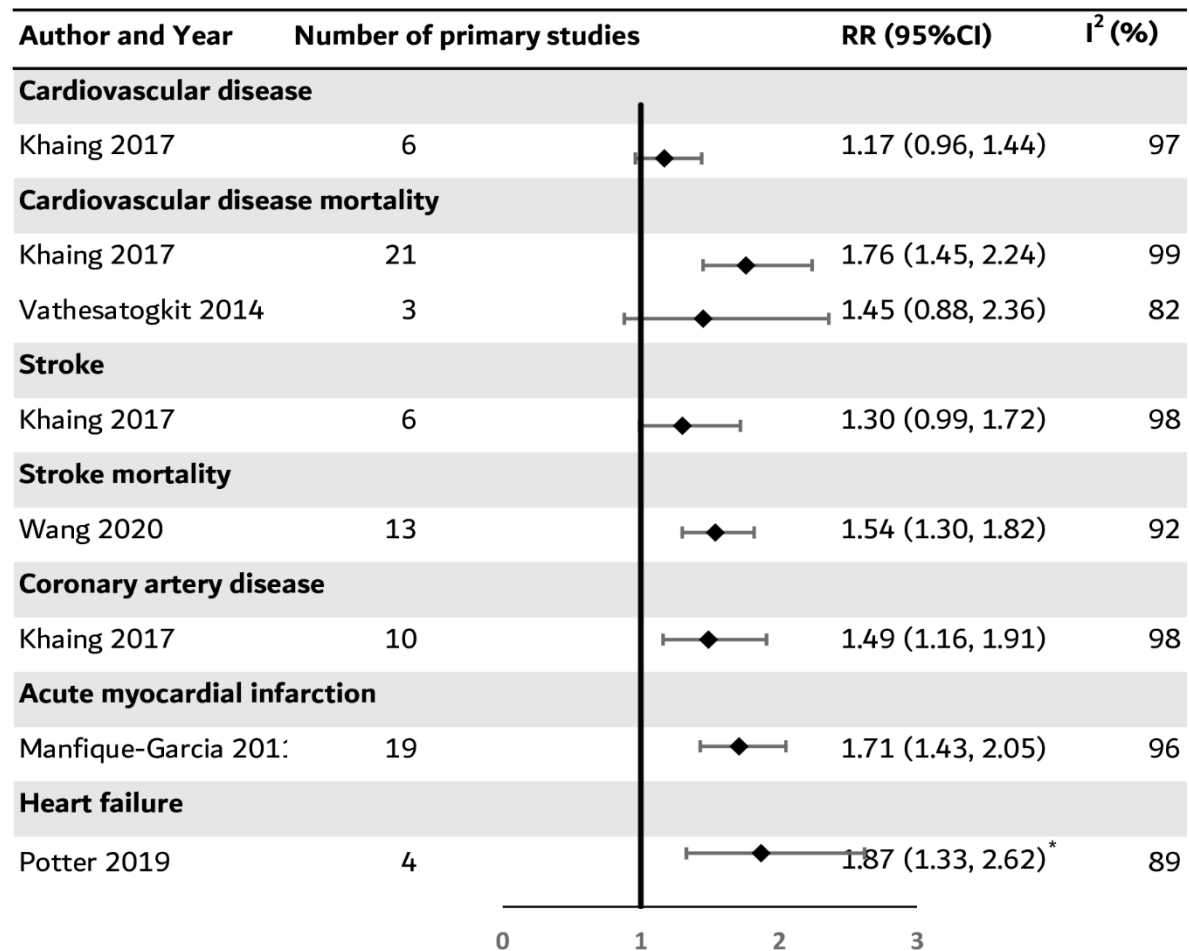

\*Hazard ratio

**Abbreviations:** CI, confidence interval; F, Female; I<sup>2</sup>, Heterogeneity; M, Male; RR, Relative Risk.

**Figure S5. Forest plot of outcomes from systematic reviews with meta-analytic analyses assessing the association between social health and CVD.**

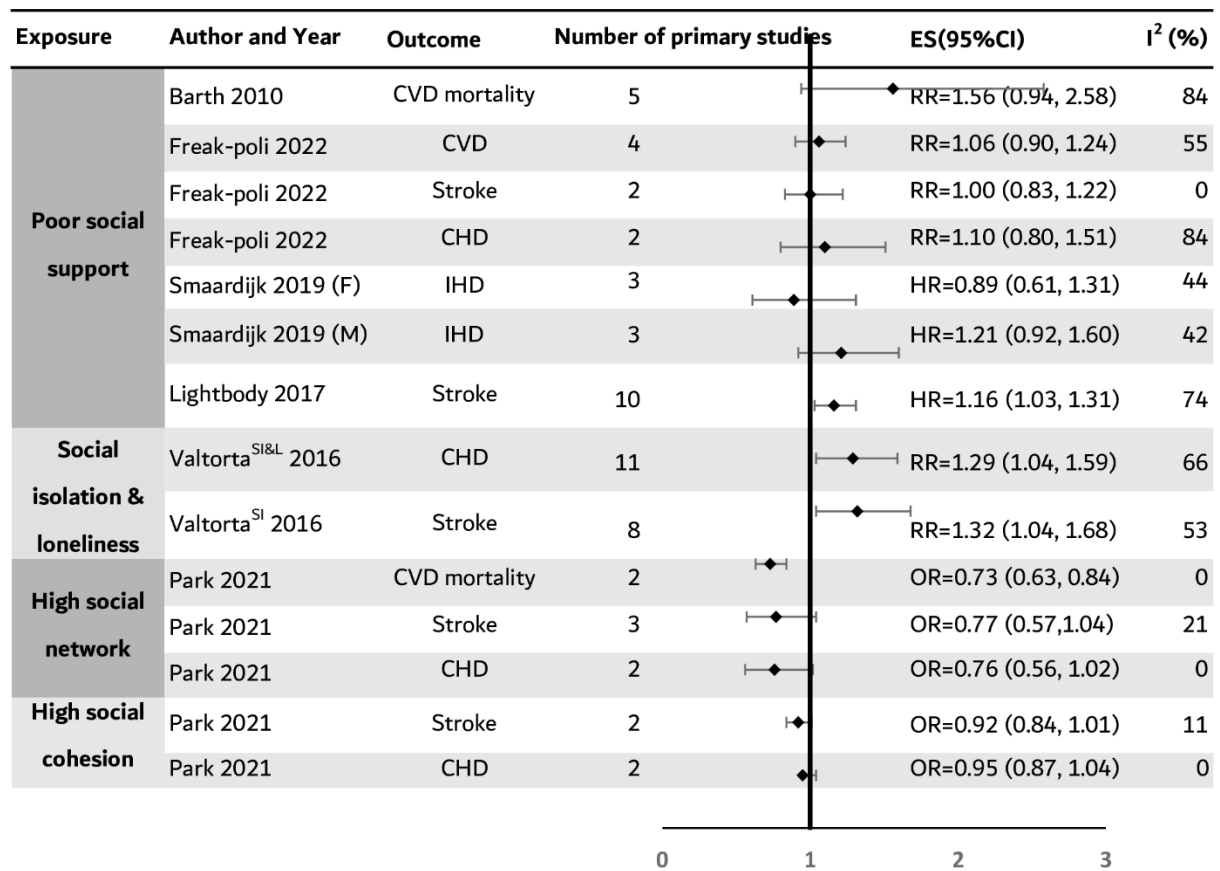

**Abbreviations:** CHD, Coronary Heart Disease; CI, confidence interval; E, Effect size; F, Female; HR, Hazard Ratio; I<sup>2</sup>, Heterogeneity; IHD, Ischemic Heart Disease; M, Male, OR, Odds Ratio; RR, Relative Risk; SI, Social isolation; SI&L, Social Isolation and Loneliness.

**Figure S6. Forest plot of outcomes from systematic reviews with meta-analytic analyses assessing the association between Ethnicity and CVD.**

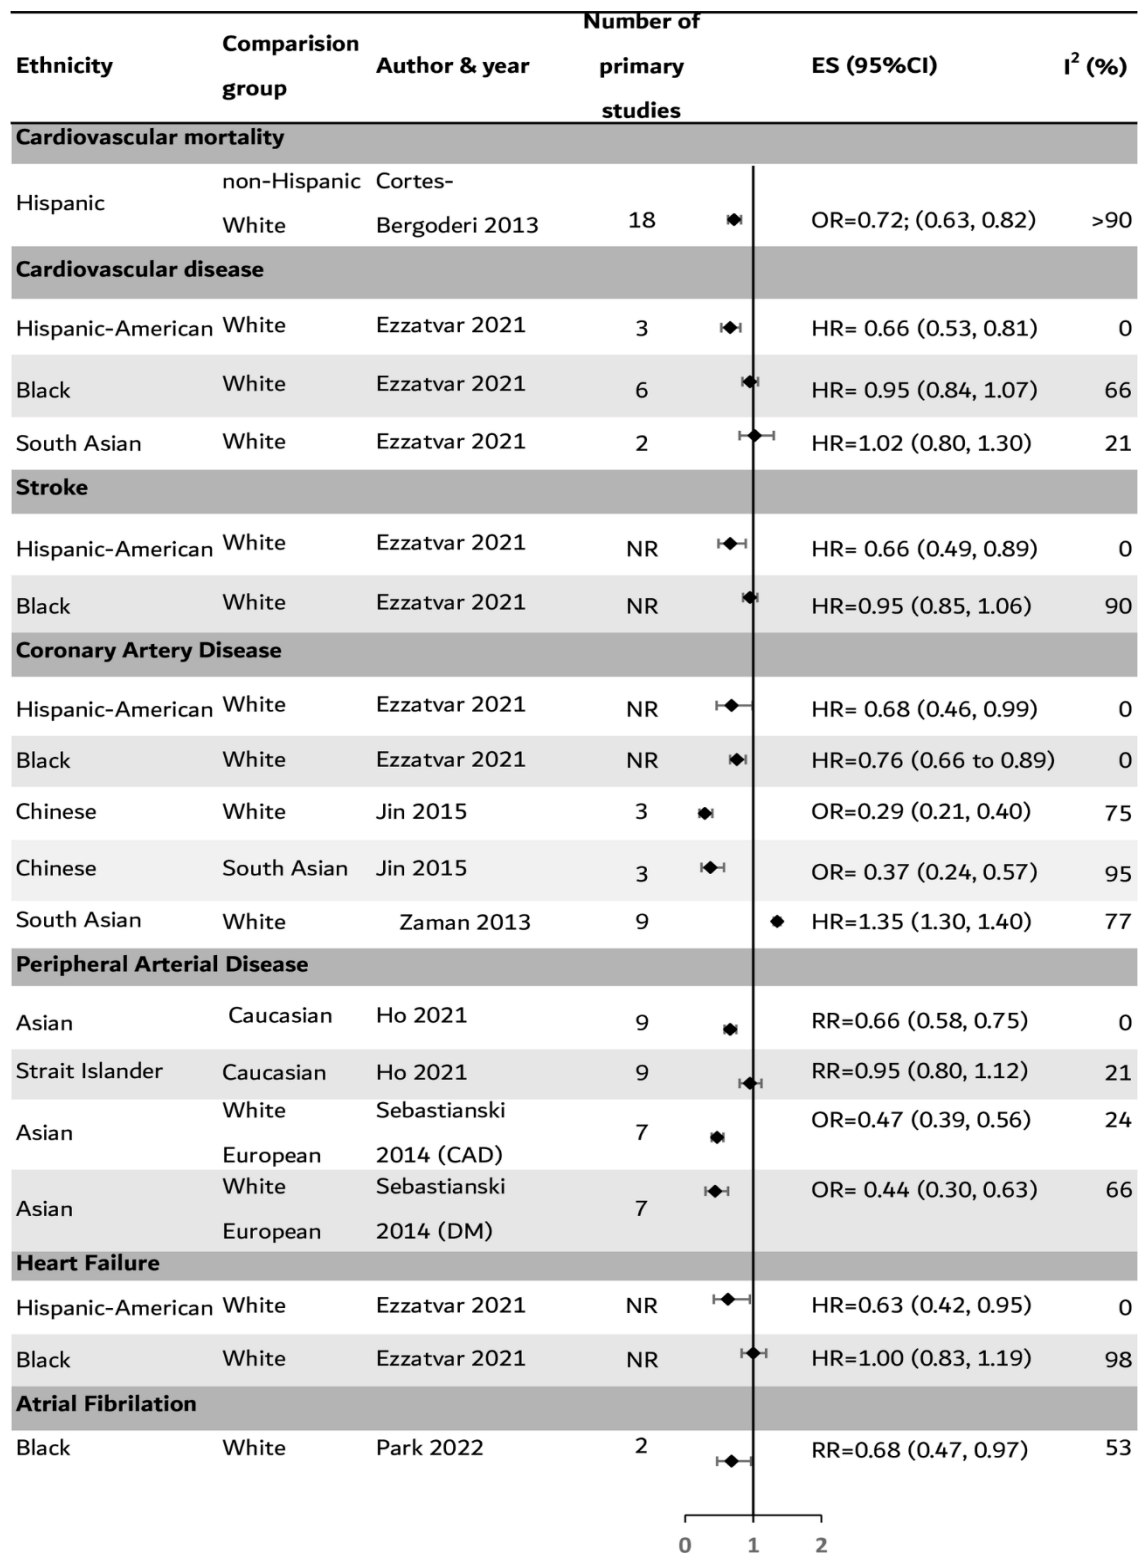

**Abbreviations:** CAD, among patients with Coronary Artery Disease; CI, confidence interval; DM, among patients with Diabetes Mellitus, ES, Effect size; HR, Hazard Ratio; I<sup>2</sup>, Heterogeneity; NR, Not Reported; OR, Odds Ratio; RR, Relative Risk.

**Figure S7. Forest plot of outcomes from systematic reviews with meta-analytic analyses assessing the association between early childhood events and adulthood CVD.**

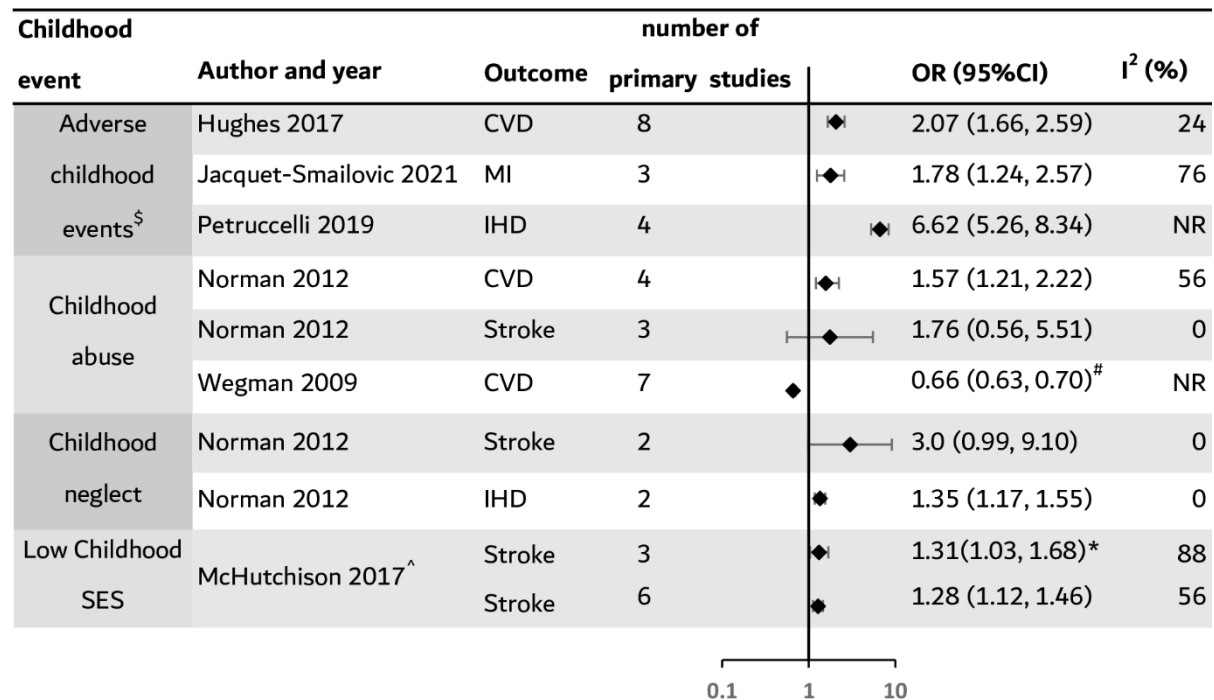

<sup>§</sup>Cumulative adverse childhood events, <sup>#</sup>Mean difference; <sup>^</sup> the author reports two effect sizes; <sup>\*</sup> Hazard Ratio;

**Abbreviations:** CI, confidence interval; I<sup>2</sup>, Heterogeneity; IHD, Ischemic Heart Disease; MI, Myocardial Infarction; NR, Not Reported; OR, Odds Ratio.



**Figure S8. Forest plot of outcomes from systematic reviews with meta-analytic analyses assessing the association between the neighborhood and build environment and adulthood CVD.**

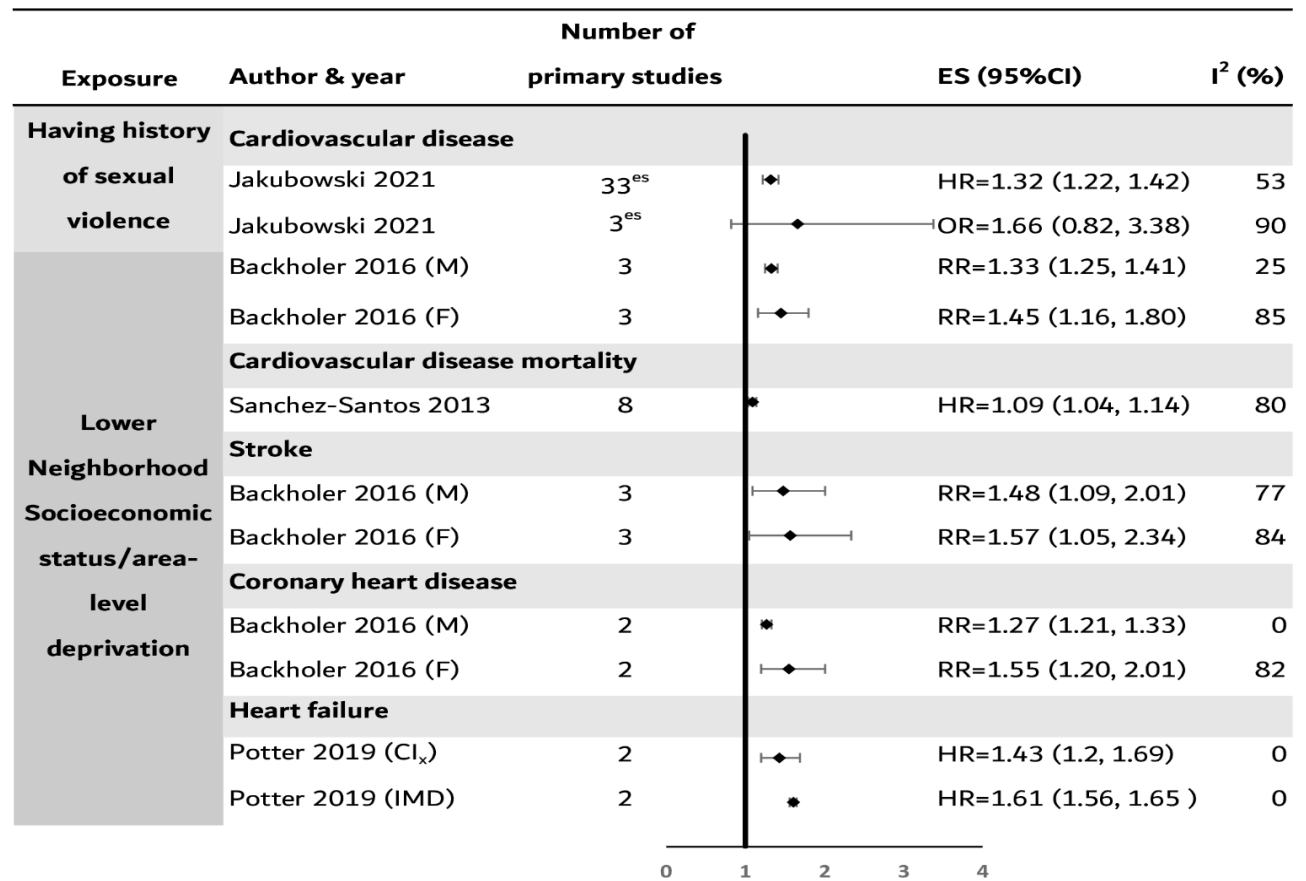

<sup>es</sup> number of effect sizes

**Abbreviations:** CI, confidence interval; CI<sub>x</sub>, Carstairs index; E, Effect size; F, Female; HR, Hazard Ratio; I<sup>2</sup>, Heterogeneity; IMD, Index of Multiple Deprivation; M, Male; OR, Odds Ratio; RR, Relative risk.
